# Supplementary material for: Copper-Mediated Nitrosation: 2-Nitrosophenolato Complexes and Their Use in the Synthesis of Heterocycles
Source: PubMed Central journal article supplement (PMC6891769; doi:10.3390/molecules24224154), 2019-11-16
Supplement: molecules-24-04154-s001.pdf [file molecules-24-04154-s001.pdf]

*Supplementary Information*

# **Towards Ortho-Nitrosation of Phenols via Formation of Copper-Nitrosophenolato Complexes- Supplementary Information**

**Alexander J. Nicholls<sup>1</sup>, Andrei S. Batsanov<sup>1</sup> and Ian R. Baxendale<sup>1\*</sup>**

<sup>1</sup>Department of Chemistry, University of Durham, South Road, Durham, Durham, UK. DH1 3LE.

S2 – X-ray Crystallography for compounds **2a,c,d,k, 3j(i), 4a,b, d**

S6 – NMR spectra of compounds **3a-3o** and **4a-4h**.

S27 – Accurate mass measurements for compounds **2a, b, d, h, i, 3a-c, g, h, j(i), l, m, o, 4a-4h**.

S38 – IR spectra of compounds **2a-2o, 3j(i), l, 4a-4h**.

# X-ray crystallography

**Table S1.** Crystal data and experimental details

| <b>Compound</b>                                              | <b>2a</b>                                                       | <b>2c</b>                                                                       | <b>2d</b>                                                       | <b>2k</b>                                                                       | <b><math>\alpha</math>-3j</b>                 | <b><math>\beta</math>-3j</b>                  | <b>4a</b>                                       | <b>4b</b>                                         | <b>4d</b>                                       |
|--------------------------------------------------------------|-----------------------------------------------------------------|---------------------------------------------------------------------------------|-----------------------------------------------------------------|---------------------------------------------------------------------------------|-----------------------------------------------|-----------------------------------------------|-------------------------------------------------|---------------------------------------------------|-------------------------------------------------|
|                                                              | 19srv268                                                        | 19srv011                                                                        | 19srv247                                                        | 19srv134                                                                        | 19srv010                                      | 19srv133                                      | 19srv012                                        | 19srv228                                          | 19srv290                                        |
| CCDC                                                         | 1957008                                                         | 1957005                                                                         | 1957006                                                         | 1957007                                                                         | 1957003                                       | 1957009                                       | 1957010                                         | 1957004                                           | 1963155                                         |
| Formula                                                      | C <sub>16</sub> H <sub>18</sub> CuN <sub>2</sub> O <sub>5</sub> | C <sub>14</sub> H <sub>12</sub> Br <sub>2</sub> CuN <sub>2</sub> O <sub>5</sub> | C <sub>16</sub> H <sub>12</sub> CuN <sub>2</sub> O <sub>8</sub> | C <sub>16</sub> H <sub>10</sub> Cl <sub>4</sub> CuN <sub>4</sub> O <sub>6</sub> | C <sub>7</sub> H <sub>7</sub> NO <sub>2</sub> | C <sub>7</sub> H <sub>7</sub> NO <sub>2</sub> | C <sub>13</sub> H <sub>13</sub> NO <sub>6</sub> | C <sub>12</sub> H <sub>10</sub> ClNO <sub>6</sub> | C <sub>14</sub> H <sub>13</sub> NO <sub>8</sub> |
| <i>D</i> <sub>calc.</sub> / g cm <sup>-3</sup>               | 1.598                                                           | 2.070                                                                           | 1.835                                                           | 1.810                                                                           | 1.365                                         | 1.389                                         | 1.490                                           | 1.589                                             | 1.494                                           |
| $\mu$ /mm <sup>-1</sup>                                      | 1.40                                                            | 5.74                                                                            | 1.48                                                            | 6.70                                                                            | 0.10                                          | 0.10                                          | 0.11                                            | 0.33                                              | 0.24                                            |
| Formula Weight                                               | 381.86                                                          | 511.62                                                                          | 423.82                                                          | 559.62                                                                          | 137.14                                        | 137.14                                        | 279.24                                          | 299.66                                            | 323.25                                          |
| <i>T</i> /K                                                  | 120                                                             | 100                                                                             | 120                                                             | 120                                                                             | 100                                           | 120                                           | 100                                             | 120                                               | 100                                             |
| Crystal System                                               | monoclinic                                                      | monoclinic                                                                      | monoclinic                                                      | orthorhombic                                                                    | triclinic                                     | monoclinic                                    | monoclinic                                      | monoclinic                                        | triclinic                                       |
| Space Group                                                  | <i>P</i> 2 <sub>1</sub> / <i>c</i> (no.14)                      | <i>P</i> 2 <sub>1</sub> / <i>n</i> (no.14)                                      | <i>P</i> 2 <sub>1</sub> / <i>c</i> (no.14)                      | <i>Cmce</i> (no.64)                                                             | <i>P</i> -1 (no.2)                            | <i>P</i> 2 <sub>1</sub> / <i>c</i> (no.14)    | <i>Pc</i> (no.7)                                | <i>P</i> 2 <sub>1</sub> (no.4)                    | <i>P</i> -1 (no.2)                              |
| <i>a</i> /Å                                                  | 10.1875(8)                                                      | 7.0128(16)                                                                      | 6.4741(5)                                                       | 20.491(2)                                                                       | 7.2648(8)                                     | 12.8007(13)                                   | 5.861(6)                                        | 5.8201(12)                                        | 5.8339(14)                                      |
| <i>b</i> /Å                                                  | 6.9915(5)                                                       | 10.020(2)                                                                       | 12.0560(9)                                                      | 7.5407(7)                                                                       | 7.3201(8)                                     | 7.7538(8)                                     | 14.109(15)                                      | 7.5030(15)                                        | 10.095(3)                                       |
| <i>c</i> /Å                                                  | 22.2994(17)                                                     | 23.311(5)                                                                       | 10.1090(7)                                                      | 13.2872(14)                                                                     | 12.8572(14)                                   | 13.8767(14)                                   | 7.528(8)                                        | 14.348(3)                                         | 12.653(3)                                       |
| $\alpha$ /°                                                  | 90                                                              | 90                                                                              | 90                                                              | 90                                                                              | 88.333(2)                                     | 90                                            | 90                                              | 90                                                | 103.773(5)                                      |
| $\beta$ /°                                                   | 91.781(3)                                                       | 93.502(5)                                                                       | 103.595(3)                                                      | 90                                                                              | 78.713(2)                                     | 107.805(4)                                    | 90.70(3)                                        | 90.784(8)                                         | 91.131(5)                                       |
| $\gamma$ /°                                                  | 90                                                              | 90                                                                              | 90                                                              | 90                                                                              | 84.279(2)                                     | 90                                            | 90                                              | 90                                                | 96.467(5)                                       |
| <i>V</i> /Å <sup>3</sup>                                     | 1587.5(2)                                                       | 1635.0(6)                                                                       | 766.92(10)                                                      | 2053.1(4)                                                                       | 667.14(13)                                    | 1311.4(2)                                     | 622.5(11)                                       | 626.5(2)                                          | 718.4(3)                                        |
| <i>Z</i>                                                     | 4                                                               | 4                                                                               | 2                                                               | 4                                                                               | 4                                             | 8                                             | 2                                               | 2                                                 | 2                                               |
| $\lambda$ /Å                                                 | 0.71073                                                         | 0.6889                                                                          | 0.71073                                                         | 1.54184                                                                         | 0.6889                                        | 0.71073                                       | 0.6889                                          | 0.71073                                           | 0.9098                                          |
| Radiation                                                    | MoK $\alpha$                                                    | synchrotron                                                                     | MoK $\alpha$                                                    | CuK $\alpha$                                                                    | synchrotron                                   | MoK $\alpha$                                  | synchrotron                                     | MoK $\alpha$                                      | synchrotron                                     |
| 2 $\theta$ <sub>max</sub> /°                                 | 56                                                              | 55                                                                              | 60                                                              | 133.2                                                                           | 58.4                                          | 55                                            | 49.6                                            | 55                                                | 70                                              |
| Reflections total                                            | 22237                                                           | 19075                                                                           | 16527                                                           | 8029                                                                            | 9388                                          | 16949                                         | 3986                                            | 7346                                              | 6906                                            |
| unique                                                       | 3840                                                            | 4121                                                                            | 2239                                                            | 922                                                                             | 3893                                          | 3000                                          | 2028                                            | 2831                                              | 2896                                            |
| with <i>I</i> > 2 $\sigma$ ( <i>I</i> )                      | 3047                                                            | 3493                                                                            | 1712                                                            | 672                                                                             | 2964                                          | 2356                                          | 844                                             | 2495                                              | 2211                                            |
| <i>R</i> <sub>int</sub>                                      | 0.050                                                           | 0.081                                                                           | 0.047                                                           | 0.073                                                                           | 0.050                                         | 0.036                                         | 0.111                                           | 0.043                                             | 0.057                                           |
| Parameters                                                   | 221                                                             | 221                                                                             | 126                                                             | 132                                                                             | 237                                           | 237                                           | 186                                             | 188*                                              | 230                                             |
| Restraints                                                   | 5                                                               | 3                                                                               | 0                                                               | 111                                                                             | 0                                             | 0                                             | 158                                             | 154                                               | 0                                               |
| $\Delta\rho$ <sub>max,min</sub> /eÅ <sup>-3</sup>            | 0.48, -0.36                                                     | 2.42, -0.96                                                                     | 0.65, -0.49                                                     | 0.37, -0.35                                                                     | 0.63, -0.33                                   | 0.28, -0.18                                   | 0.85, -0.48                                     | 2.55, -0.81                                       | 0.43, -0.36                                     |
| Goodness of fit                                              | 1.037                                                           | 1.056                                                                           | 1.037                                                           | 1.079                                                                           | 1.073                                         | 1.039                                         | 1.076                                           | 1.061                                             | 1.125                                           |
| <i>wR</i> <sub>2</sub> (all data)                            | 0.081                                                           | 0.240                                                                           | 0.101                                                           | 0.118                                                                           | 0.159                                         | 0.102                                         | 0.390                                           | 0.224                                             | 0.195                                           |
| <i>wR</i> <sub>2</sub> [ <i>I</i> > 2 $\sigma$ ( <i>I</i> )] | 0.075                                                           | 0.235                                                                           | 0.094                                                           | 0.108                                                                           | 0.154                                         | 0.095                                         | 0.338                                           | 0.214                                             | 0.182                                           |
| <i>R</i> <sub>1</sub> (all data)                             | 0.054                                                           | 0.093                                                                           | 0.059                                                           | 0.069                                                                           | 0.068                                         | 0.051                                         | 0.250                                           | 0.094                                             | 0.079                                           |
| <i>R</i> <sub>1</sub> [ <i>I</i> > 2 $\sigma$ ( <i>I</i> )]  | 0.034                                                           | 0.084                                                                           | 0.037                                                           | 0.045                                                                           | 0.056                                         | 0.037                                         | 0.147                                           | 0.085                                             | 0.064                                           |

\*Flack parameter  $x = -0.06(5)$

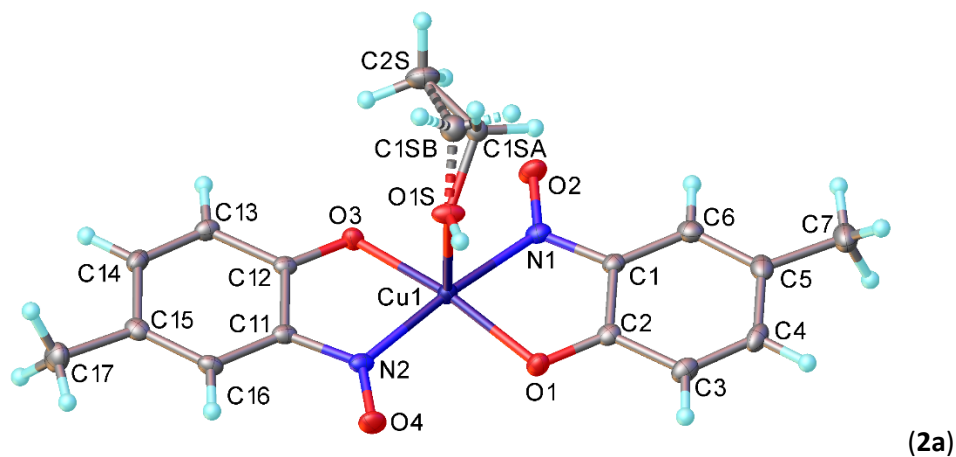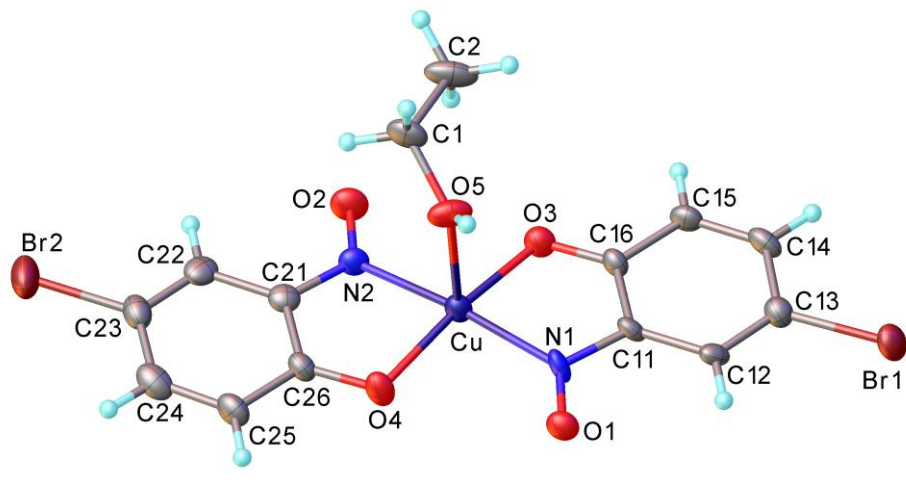

**Figure S1.** X-ray molecular structures of **2a** (showing the disorder) and **2c**. Thermal ellipsoids are drawn at the 50% probability level.

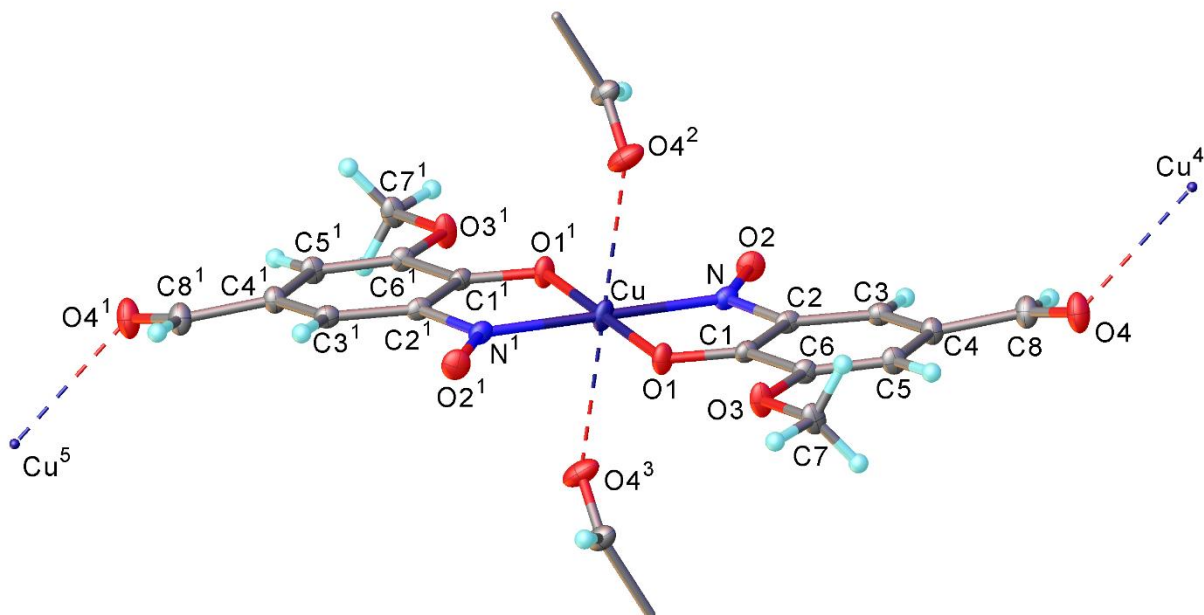

**Figure S2.** X-ray molecular structure of **2d**, showing intermolecular interactions (dashed lines). Symmetry transformations: (1)  $-x, 1-y, -z$ ; (2)  $x-1, 3/2-y, z-1/2$ ; (3)  $1-x, y-1/2, 1/2-z$ ; (4)  $x+1, 3/2-y, z+1/2$ ; (5)  $-1-x, y-1/2, -1/2-z$ .

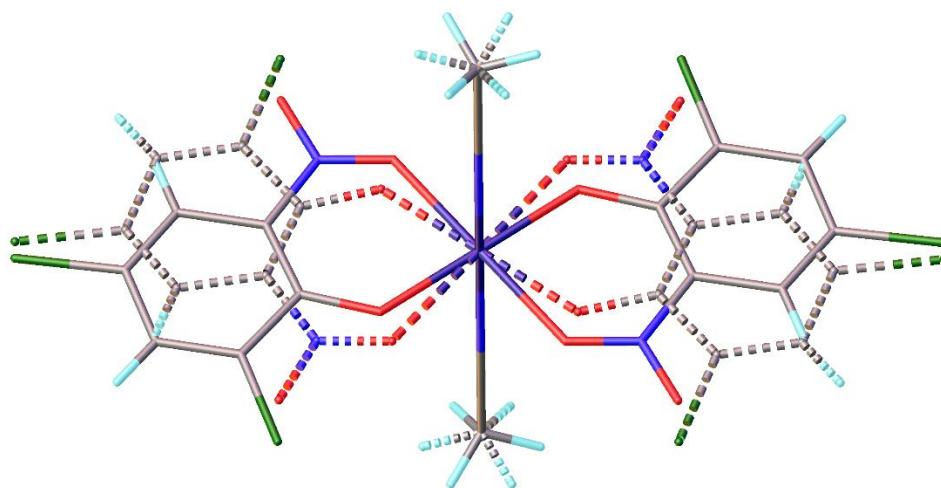

**Figure S3.** Disorder of the molecule **2k** in crystal.

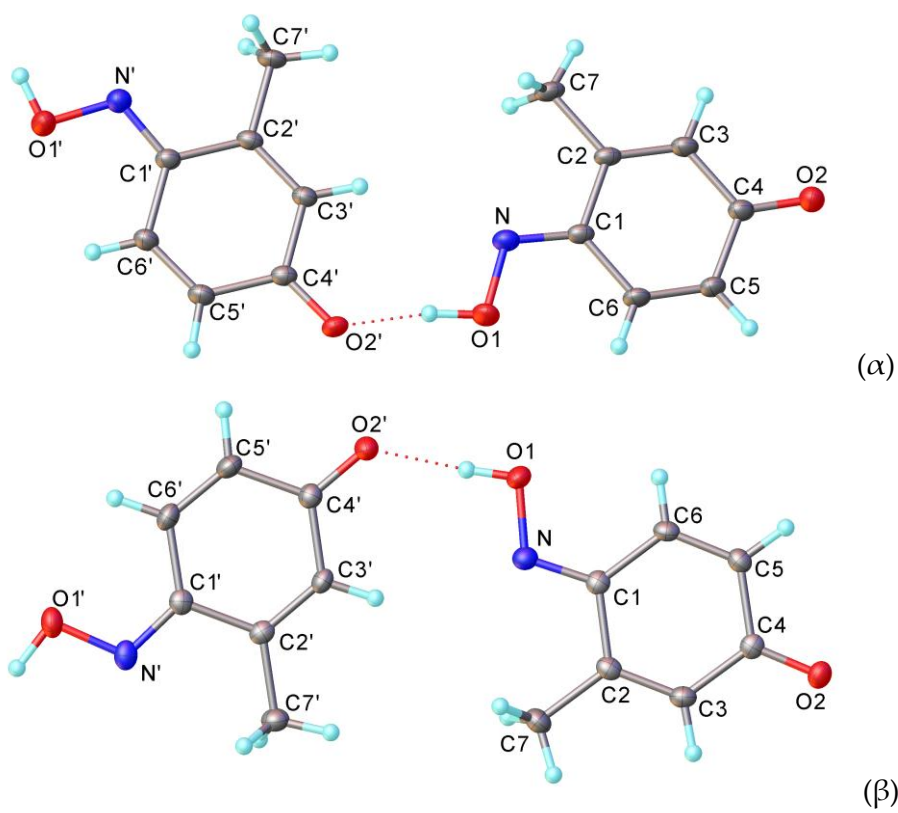

**Figure S4.** Independent molecules in the triclinic ( $\alpha$ ) and monoclinic ( $\beta$ ) polymorphs of **3j**

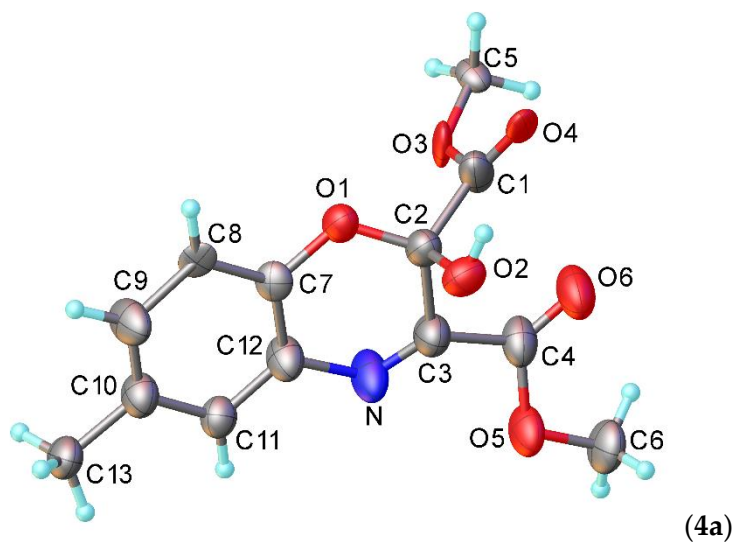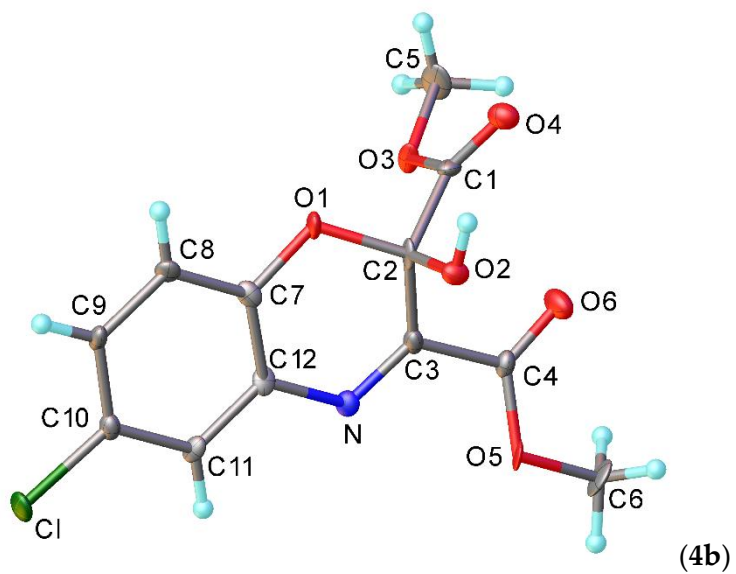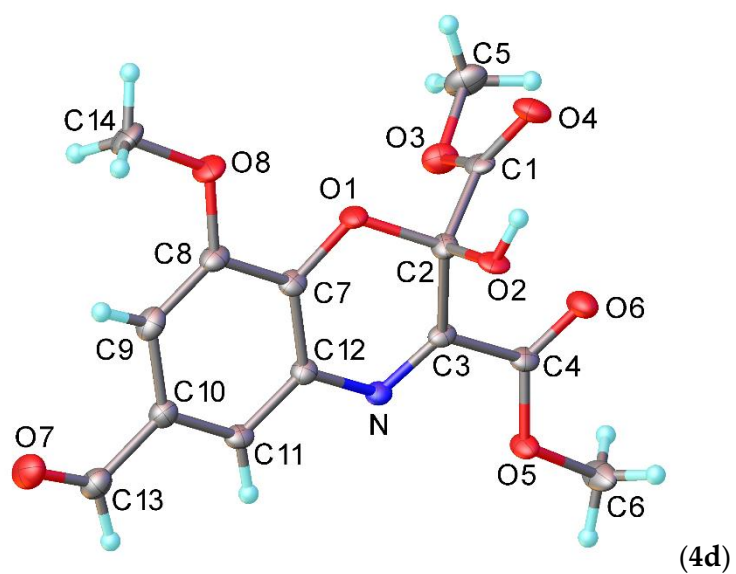

Figure S5. X-ray molecular structures of 4a, 4b and 4d

# NMR Spectra of Selected Compounds

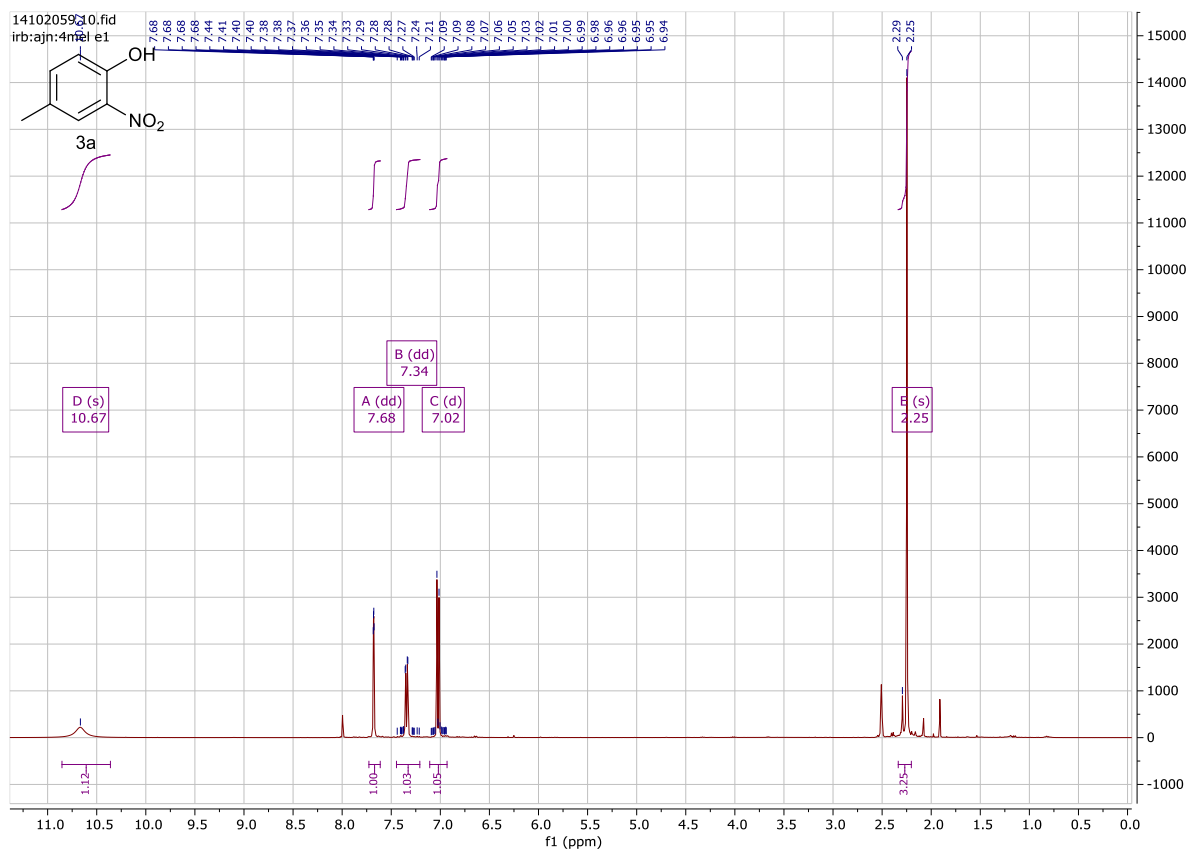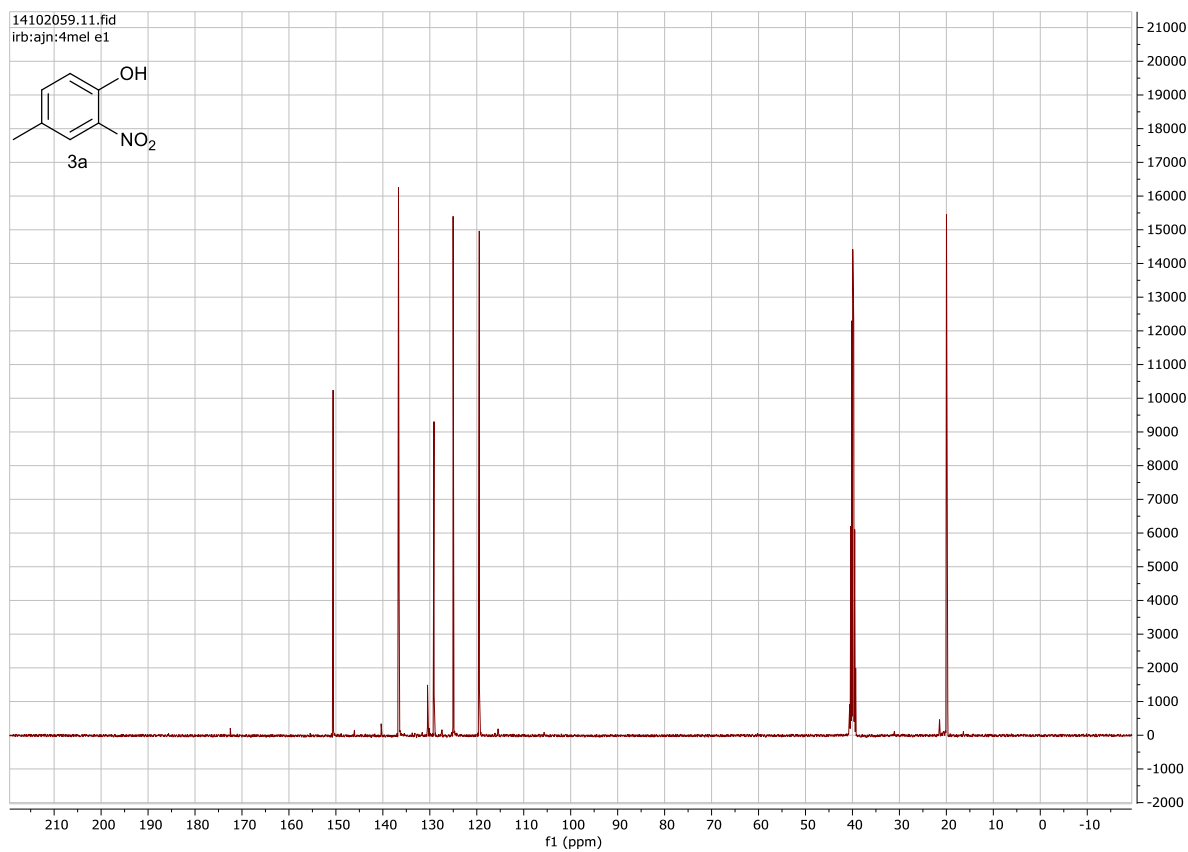

18162115.10.fid  
irb:ajj:ajj unknown sample

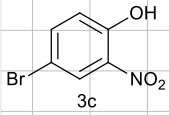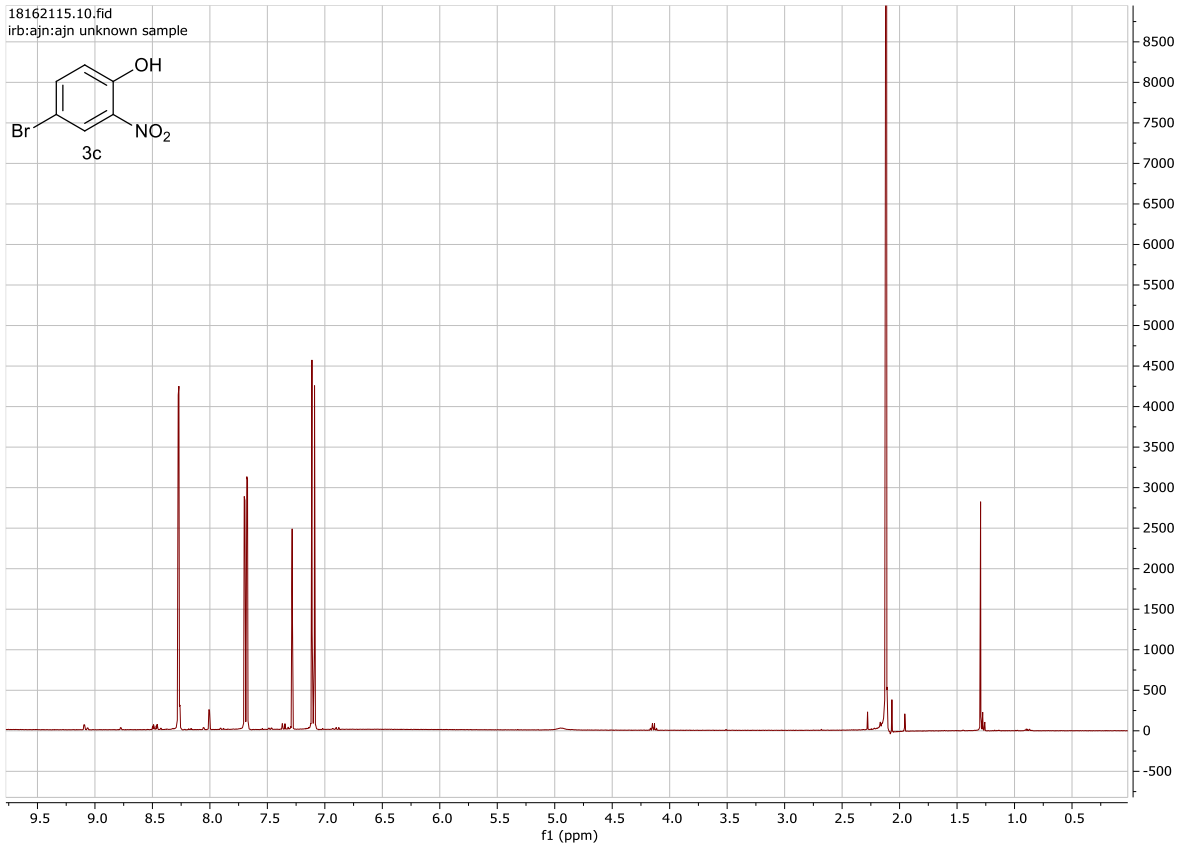

14092139.10.fid  
IRB:AJN:4BRL NO2

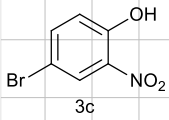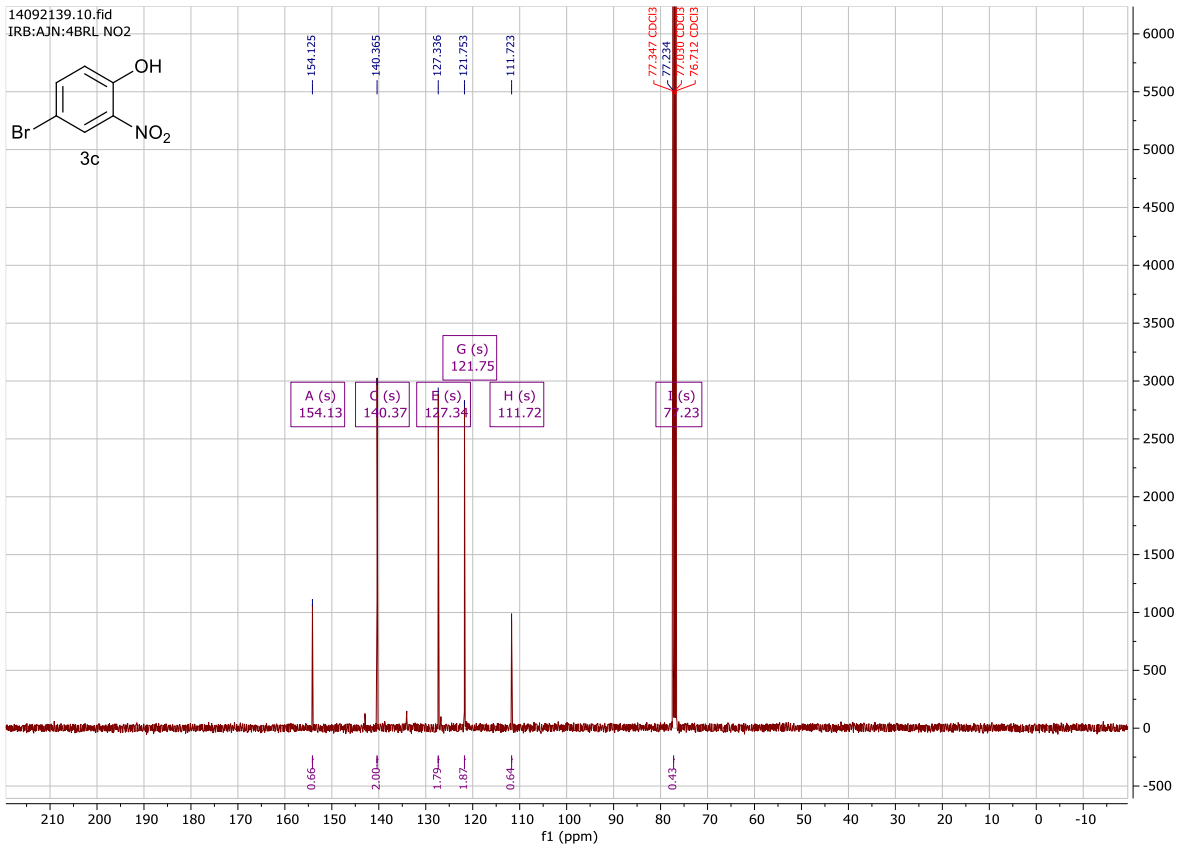

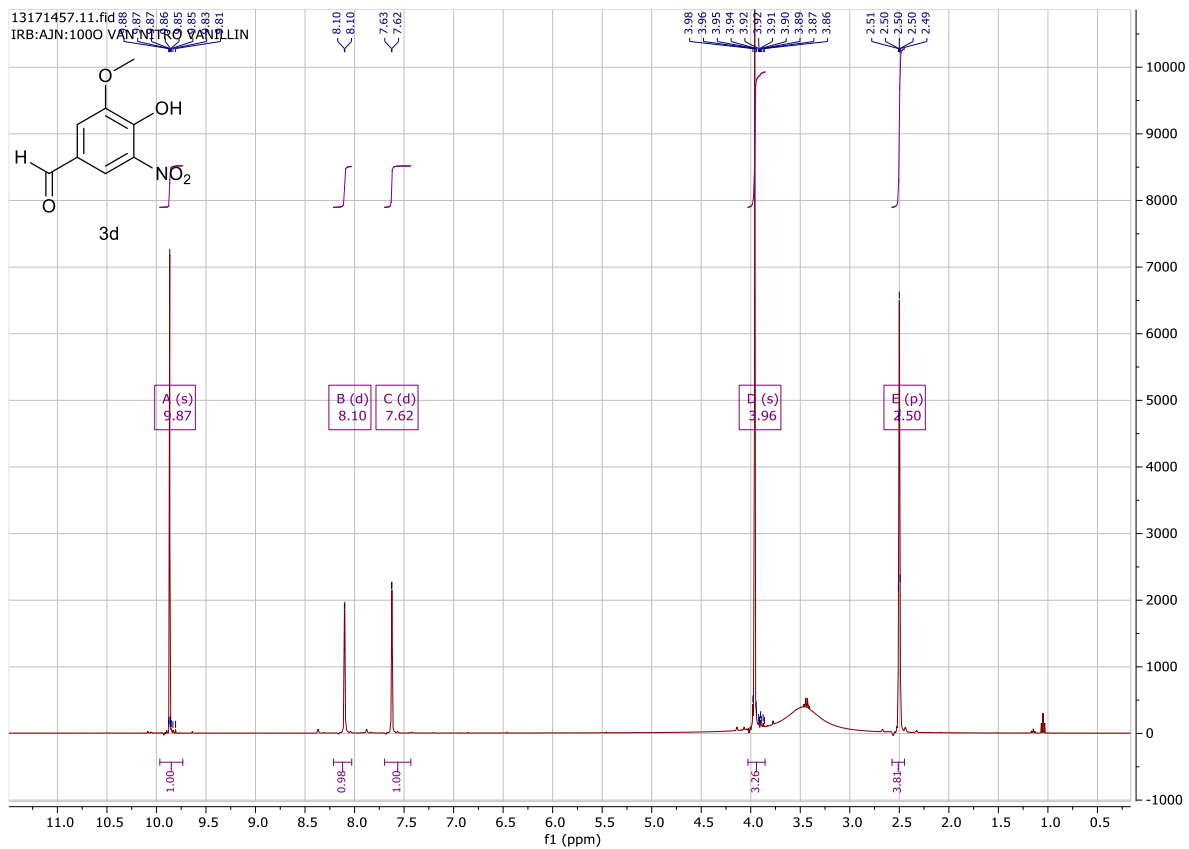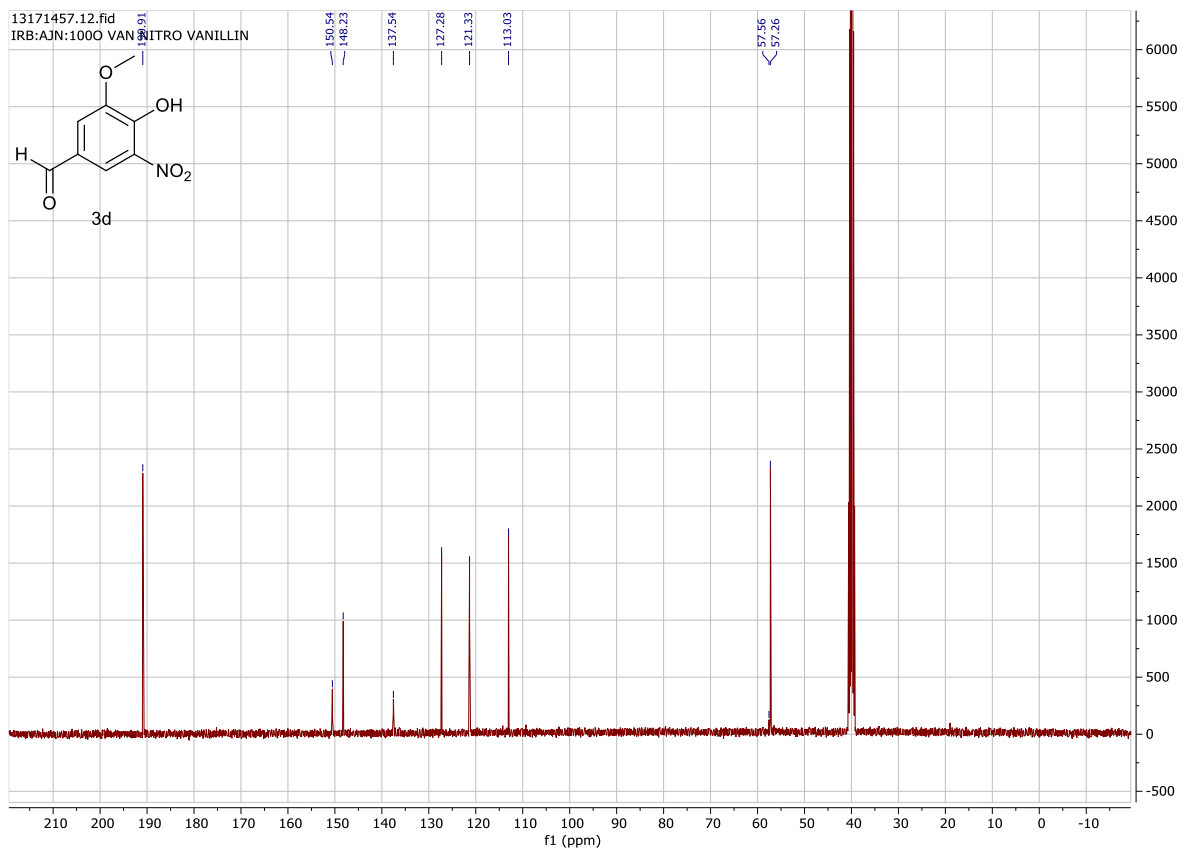



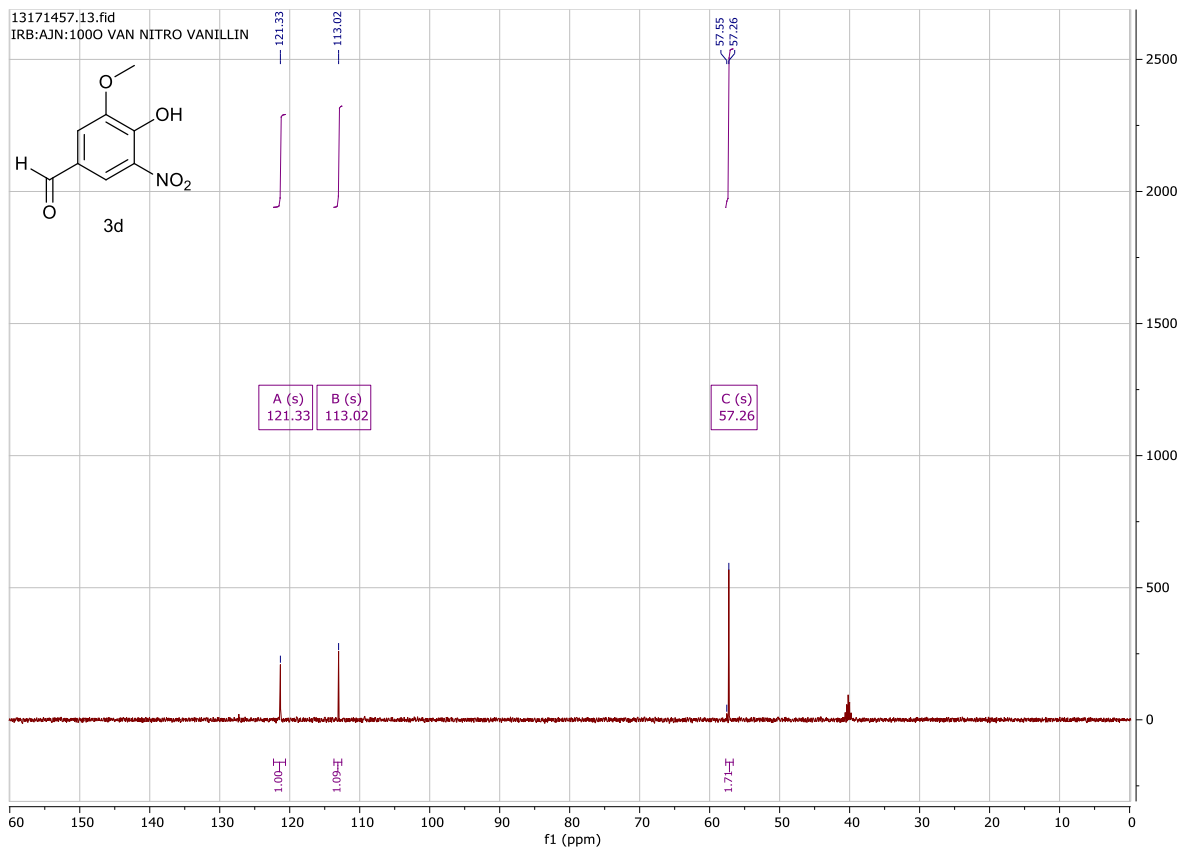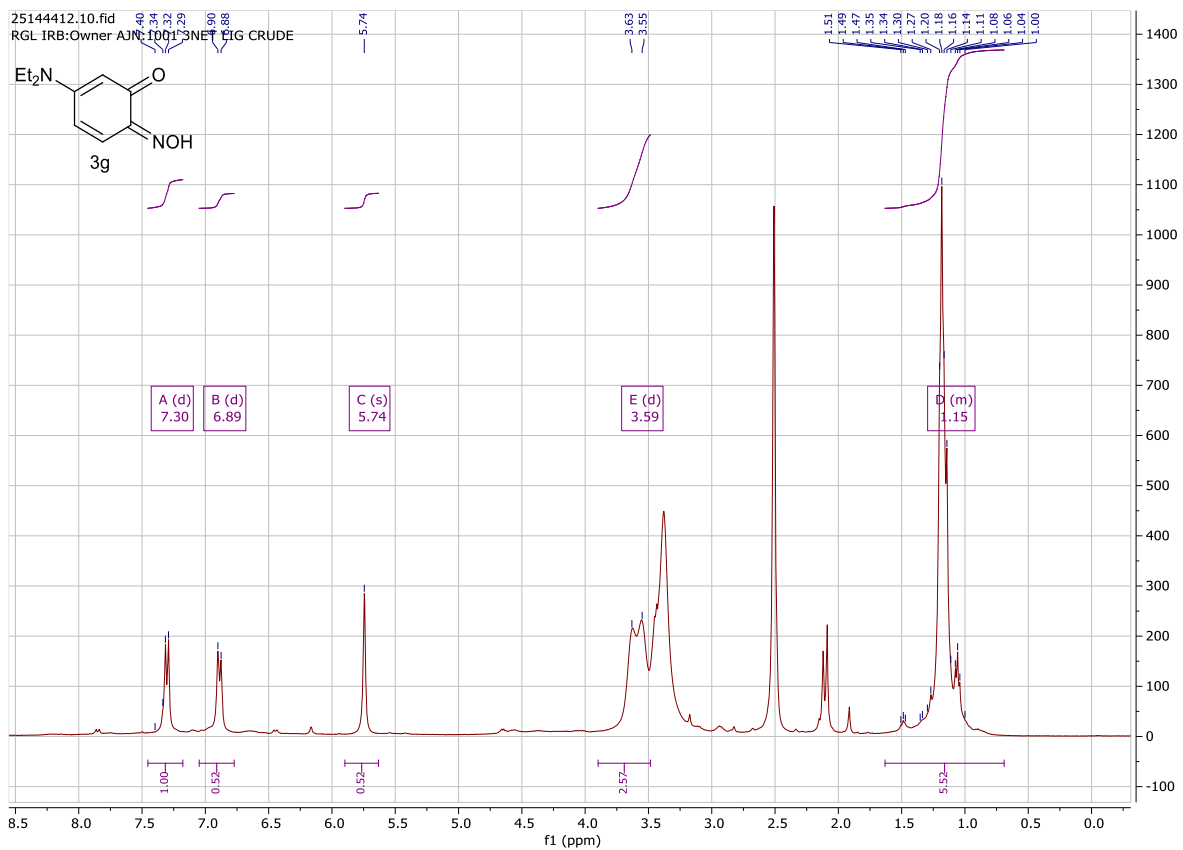

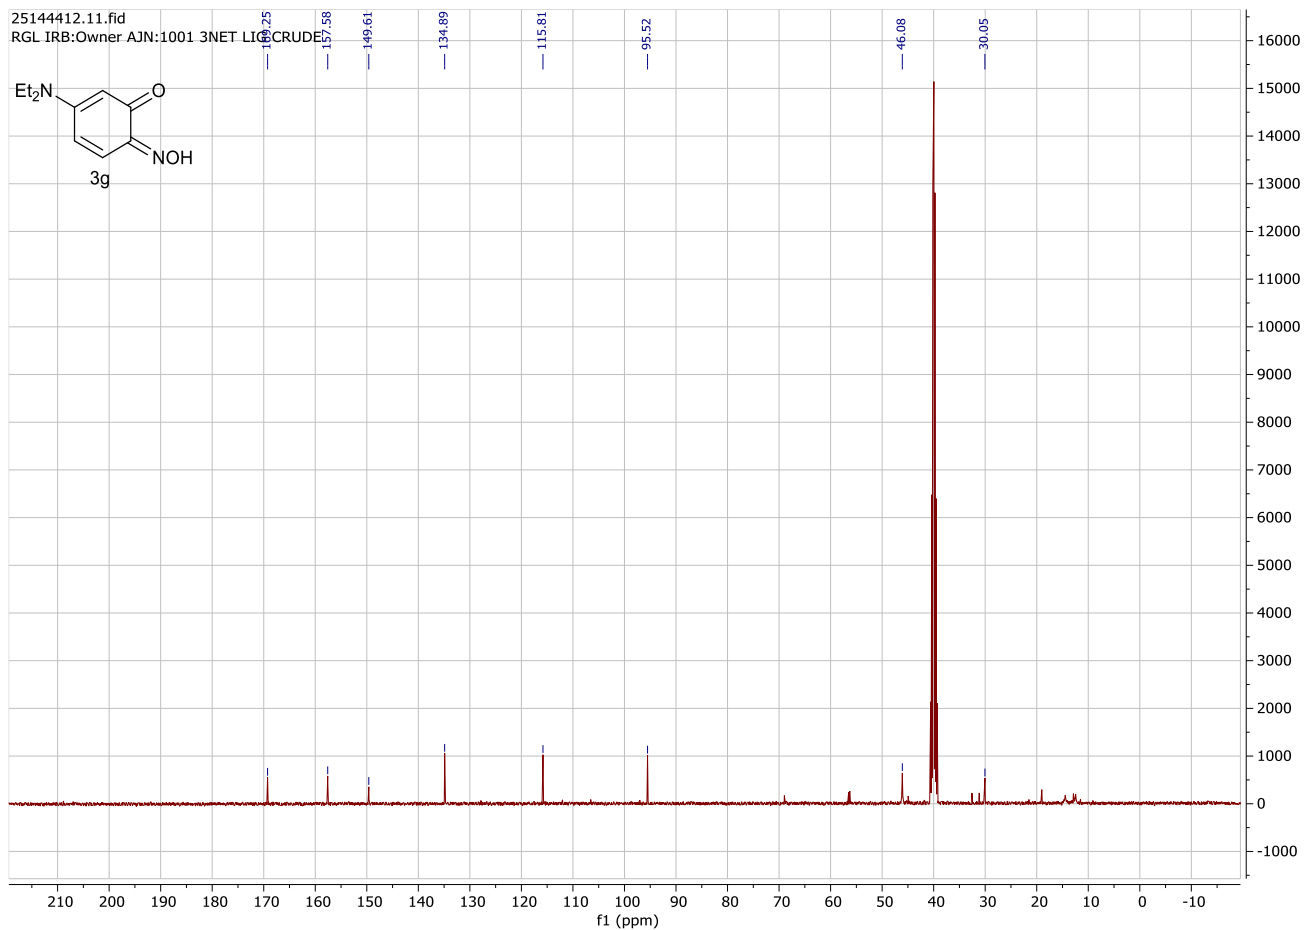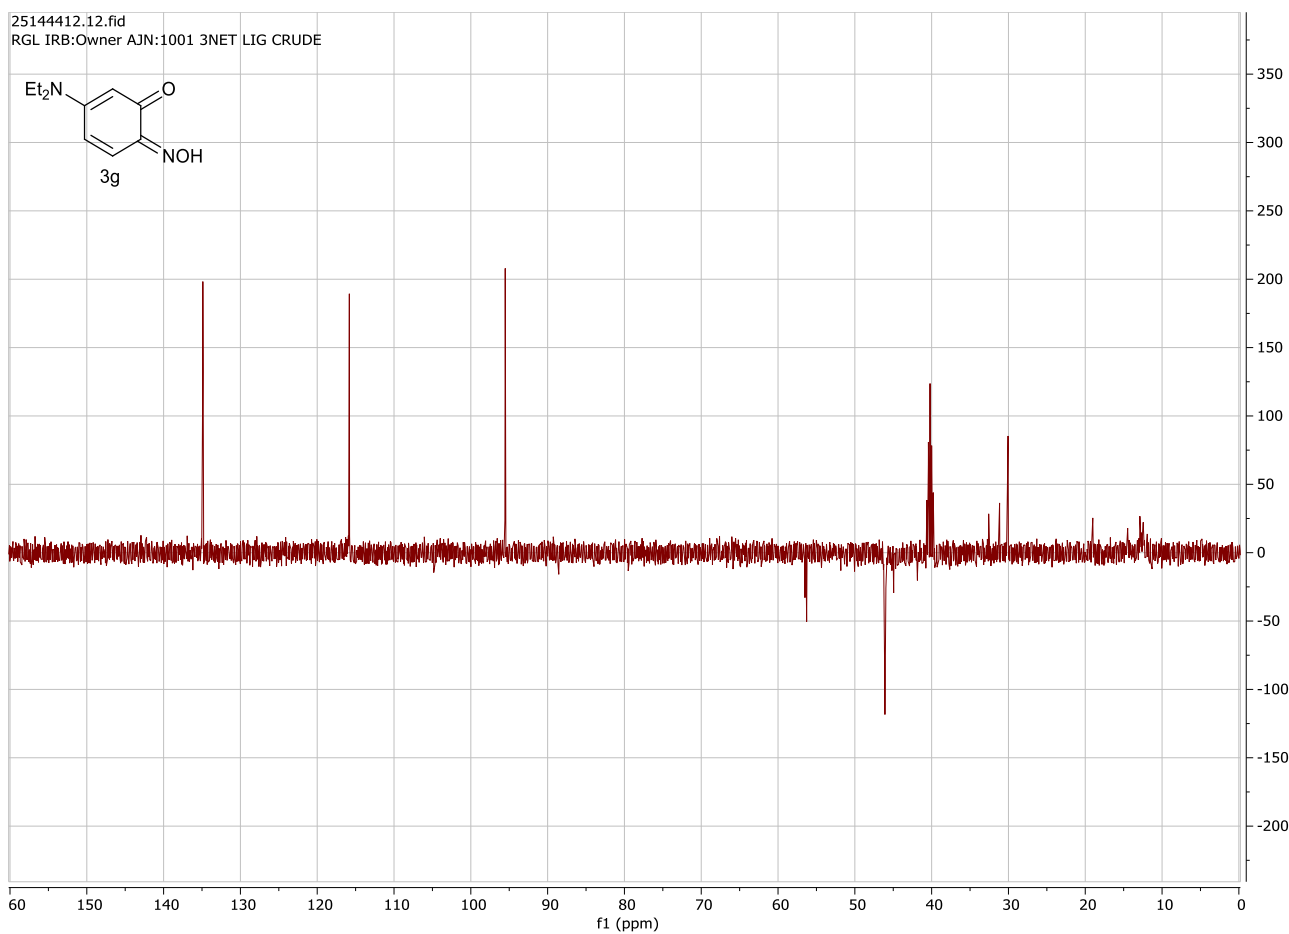

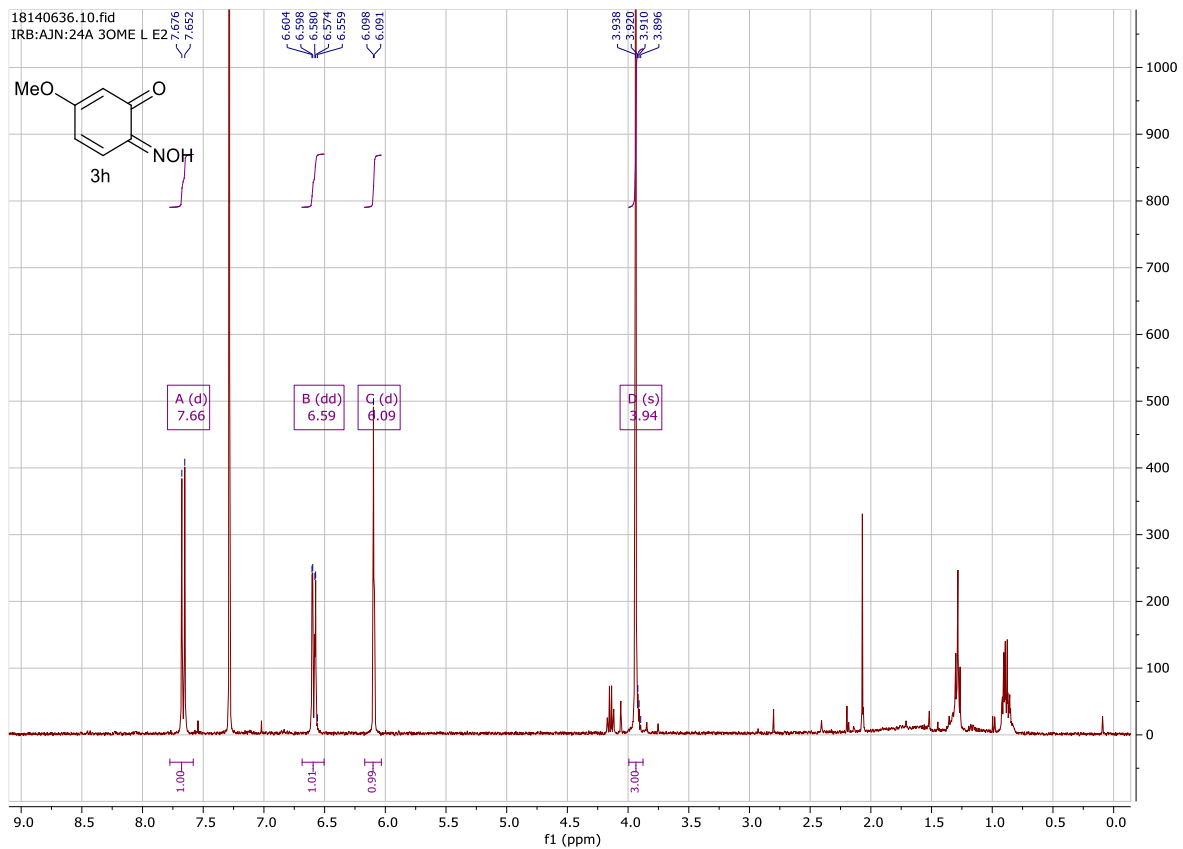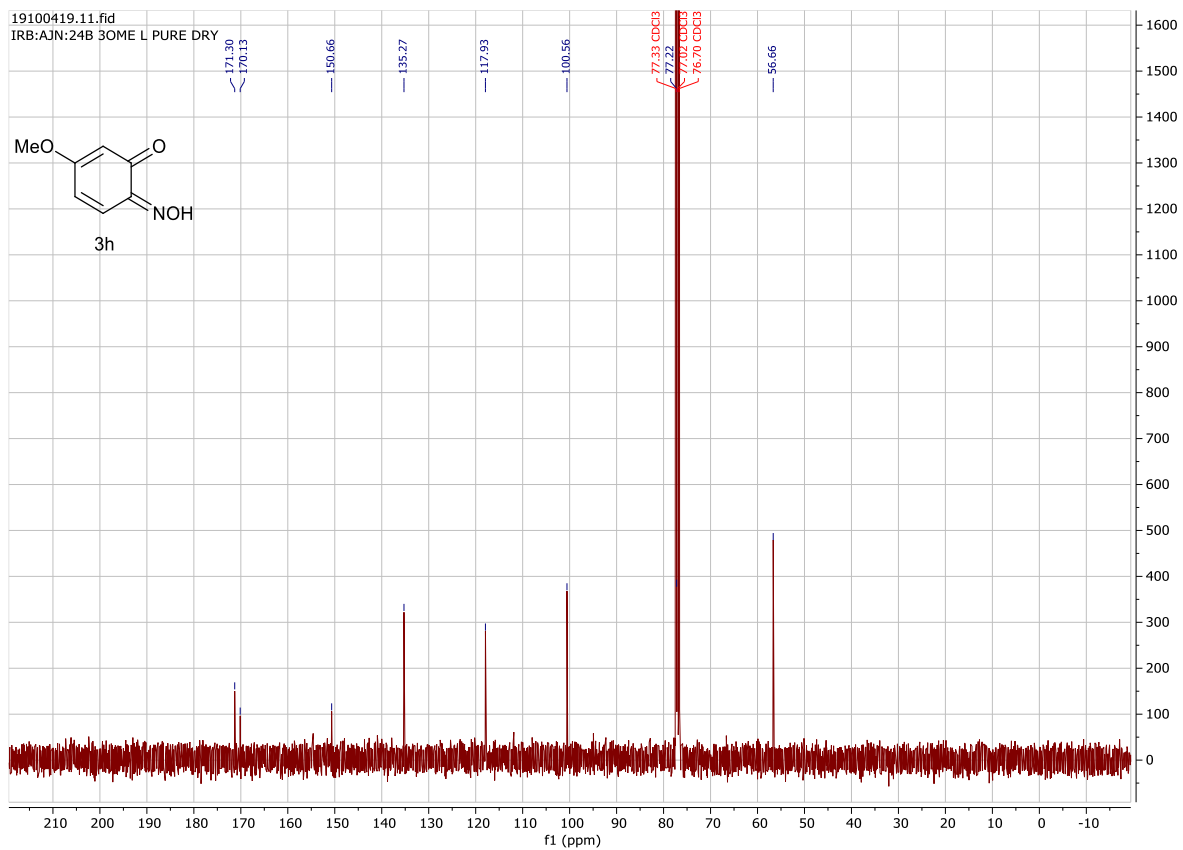

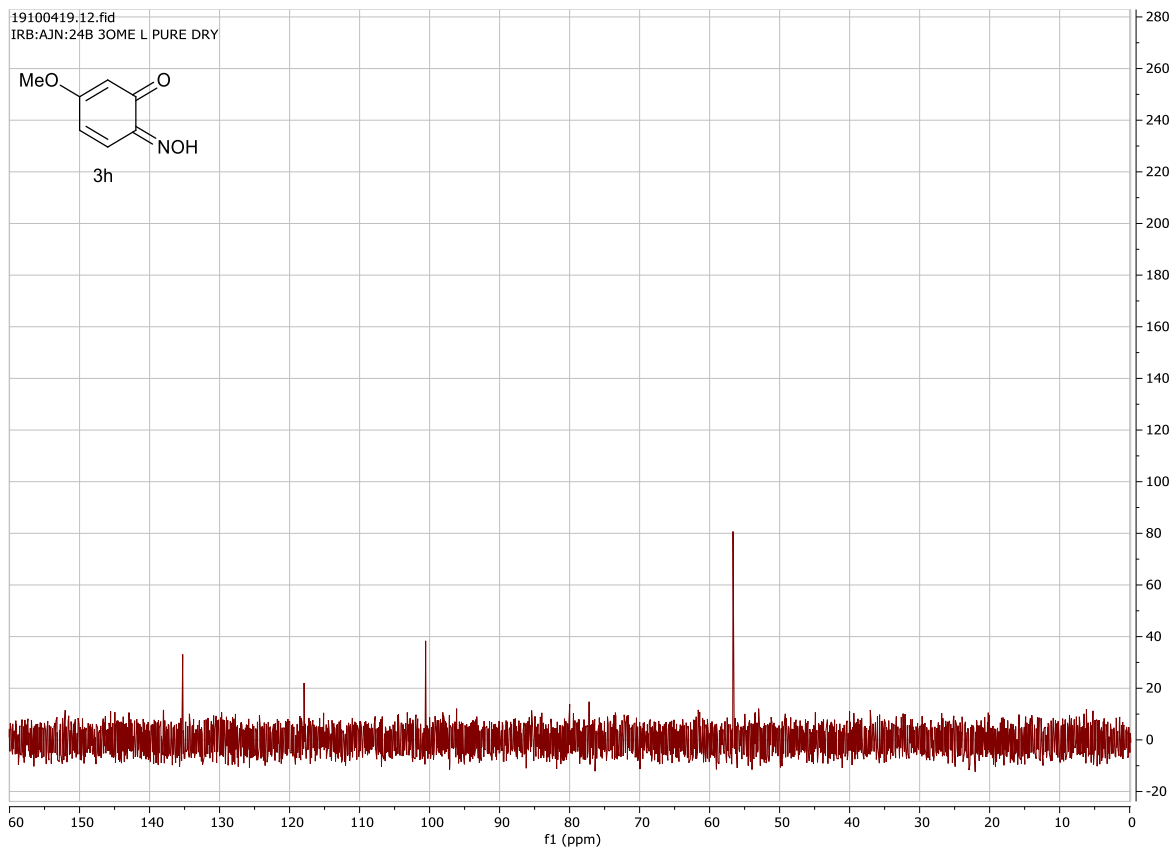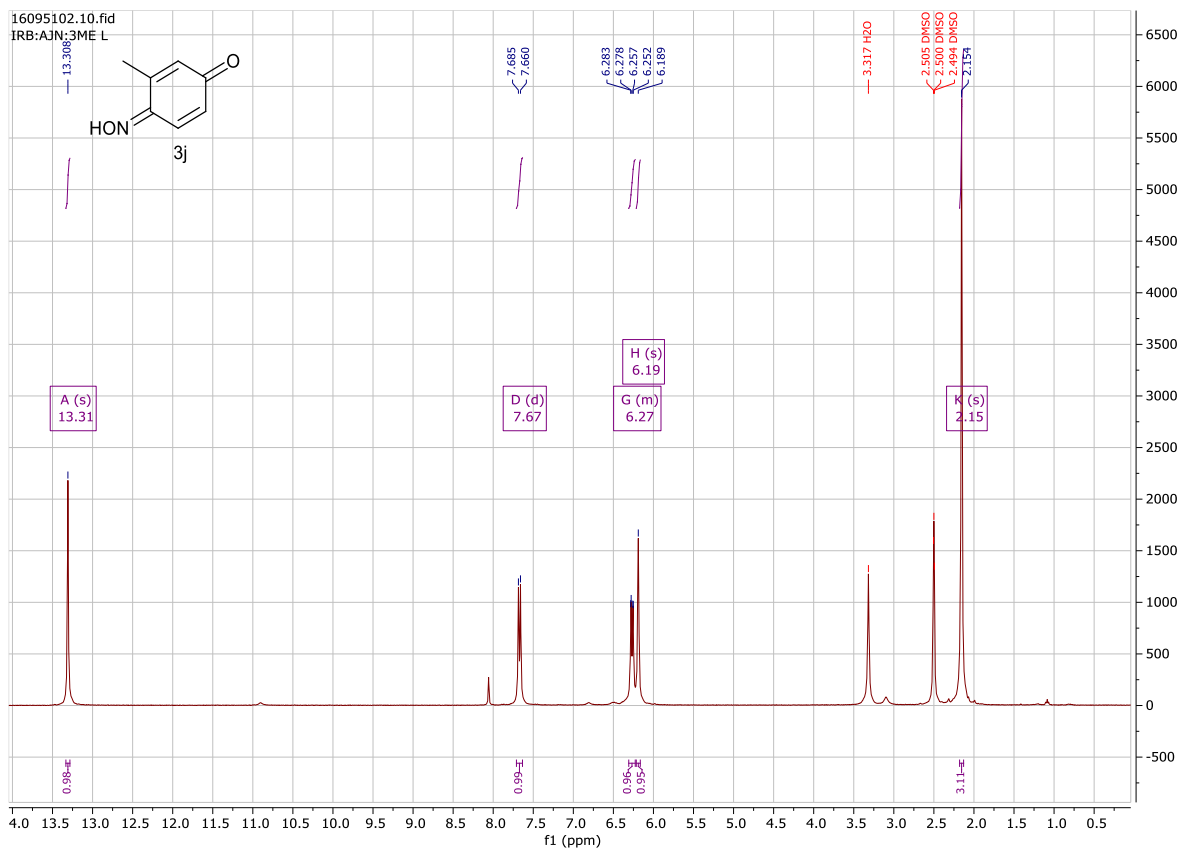

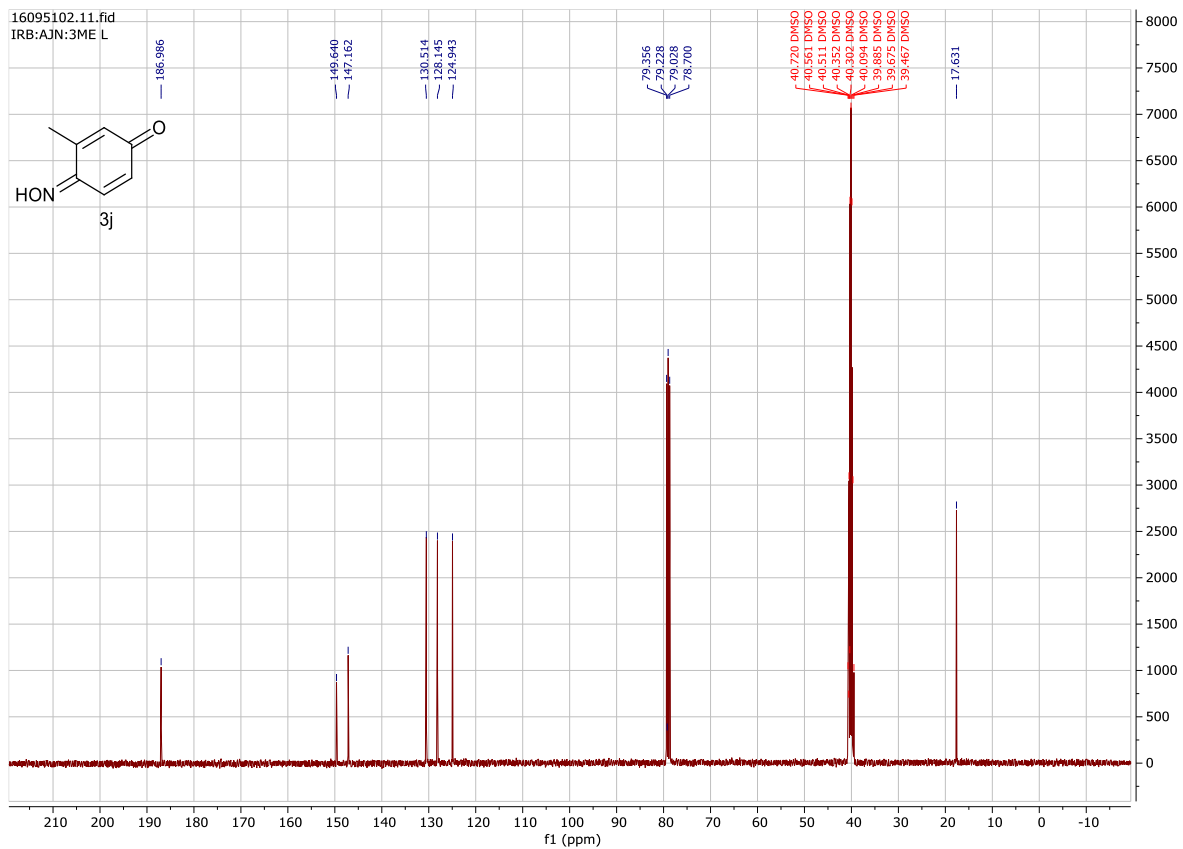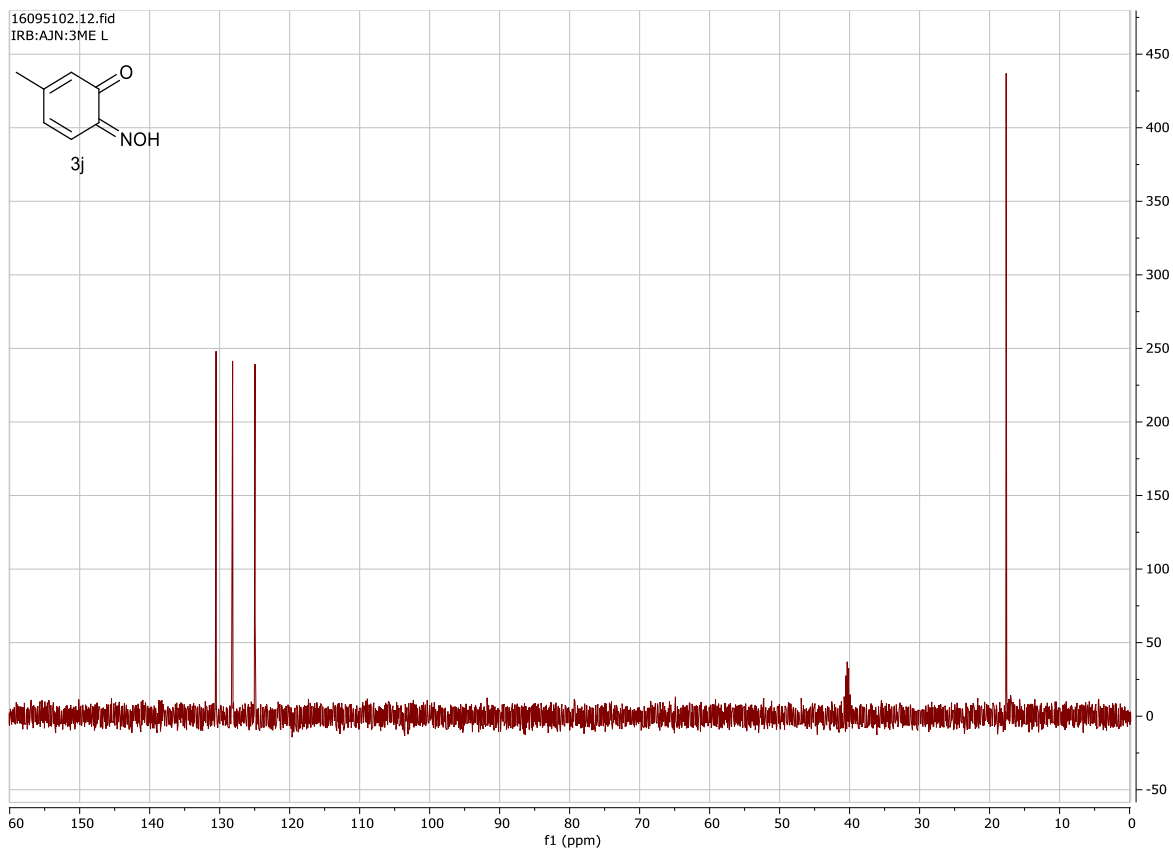

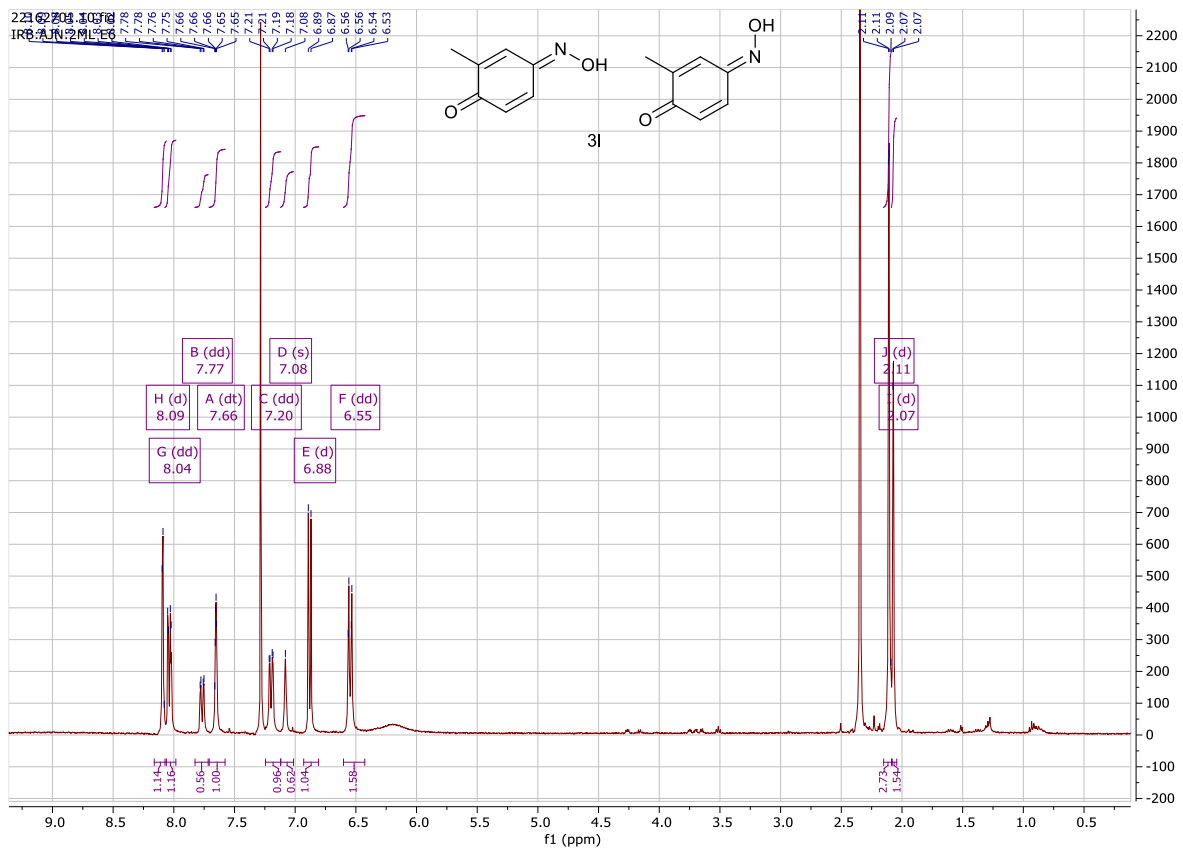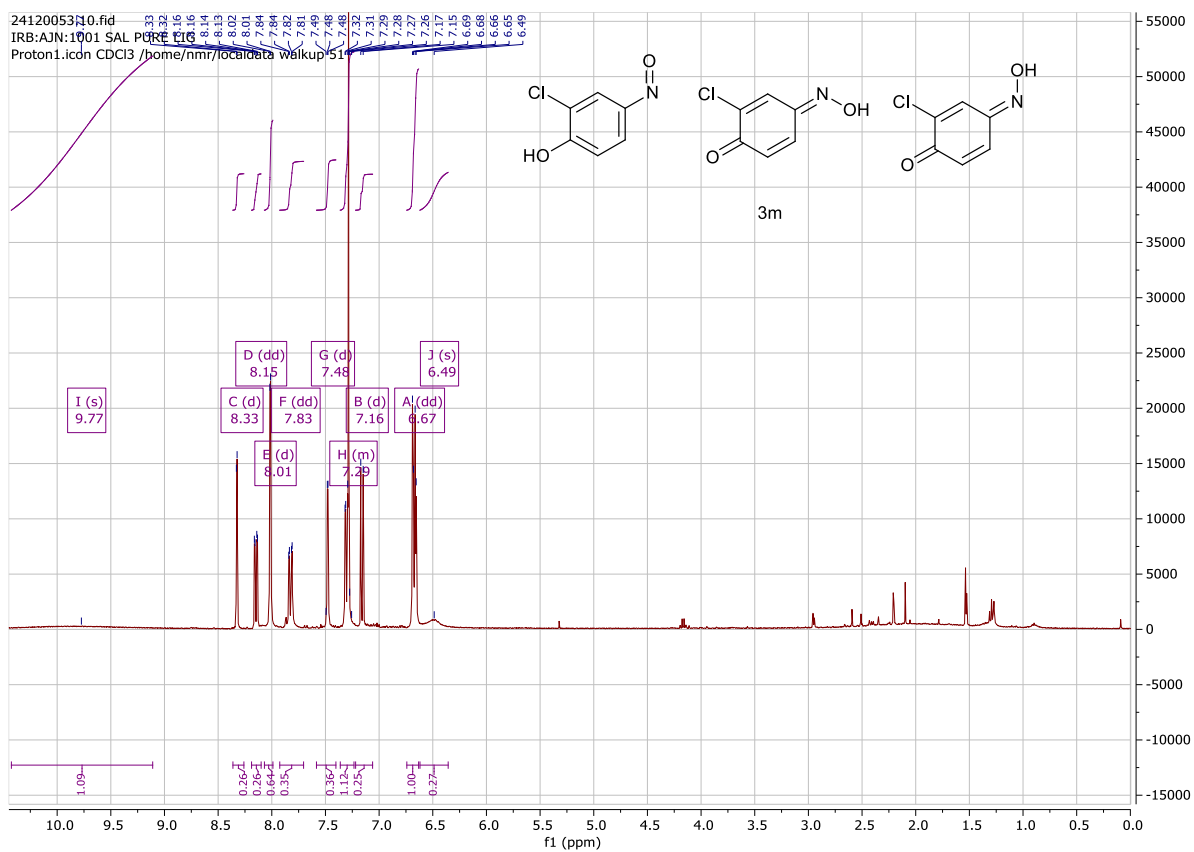

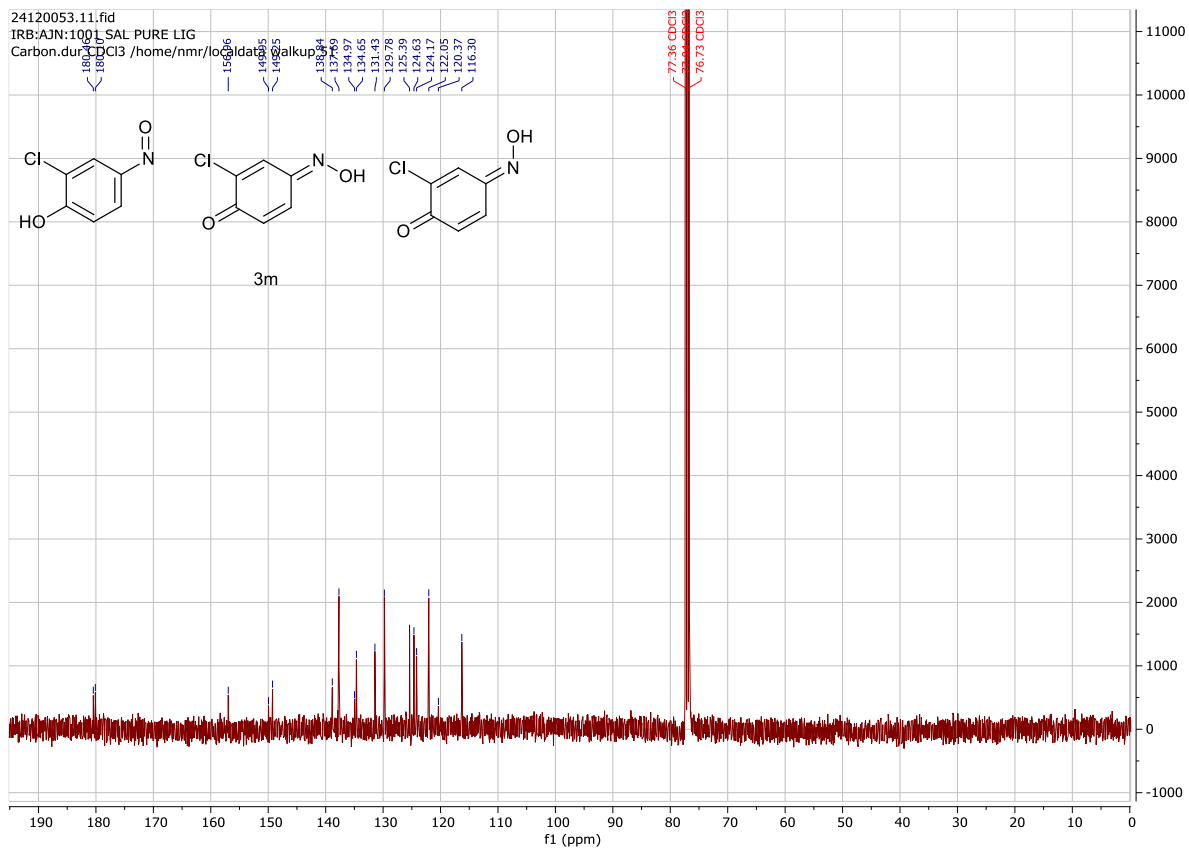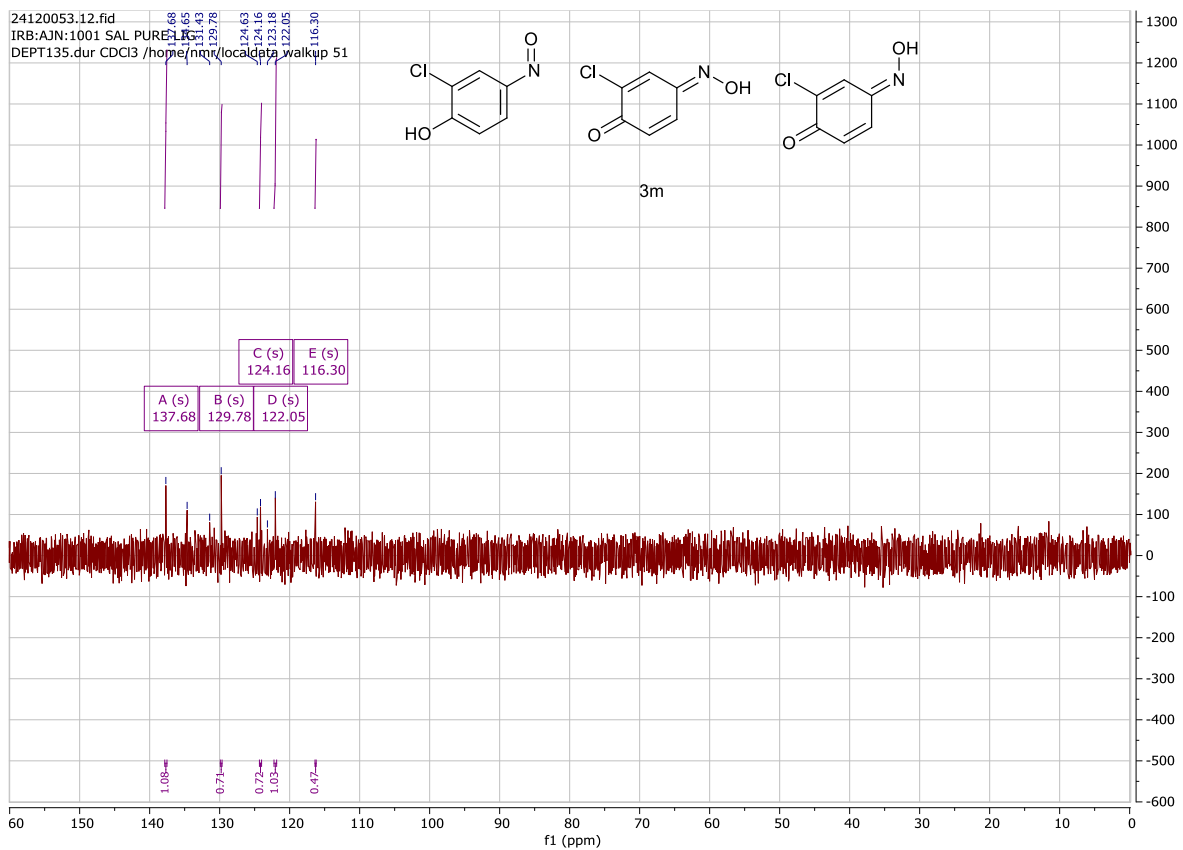

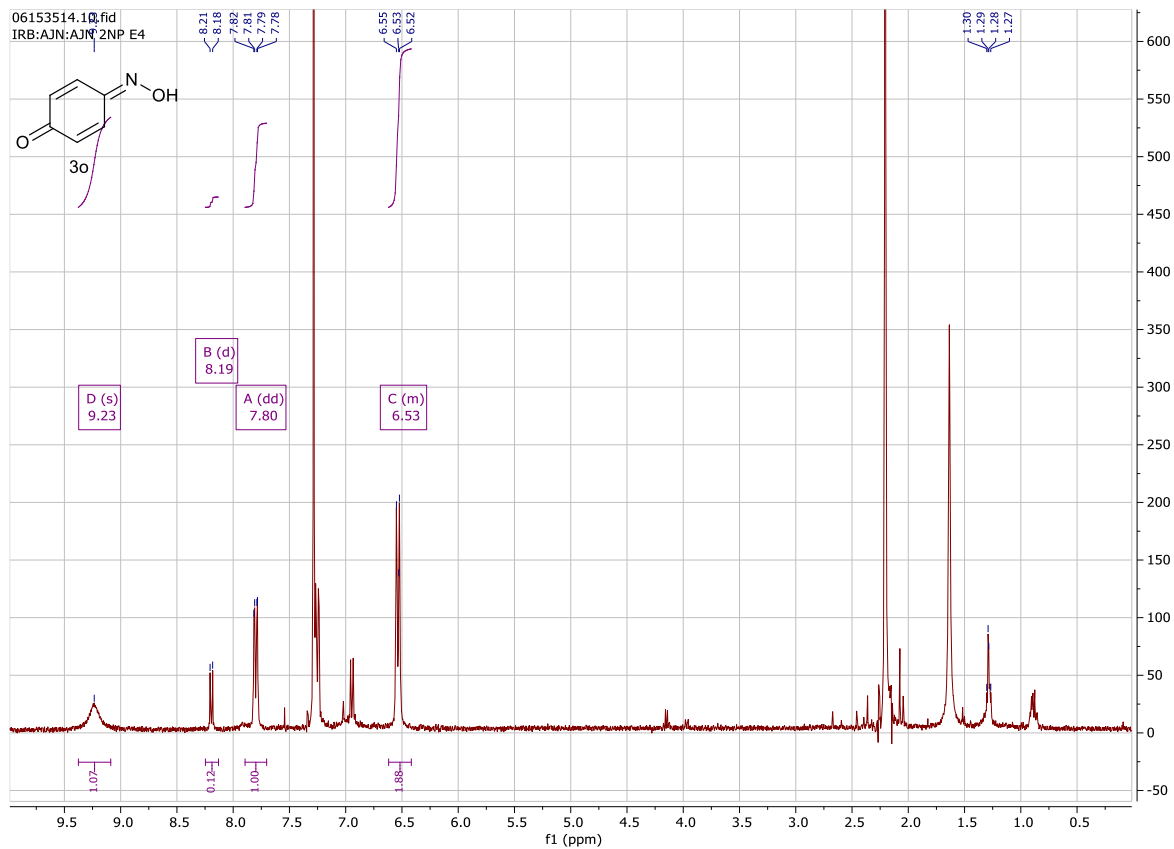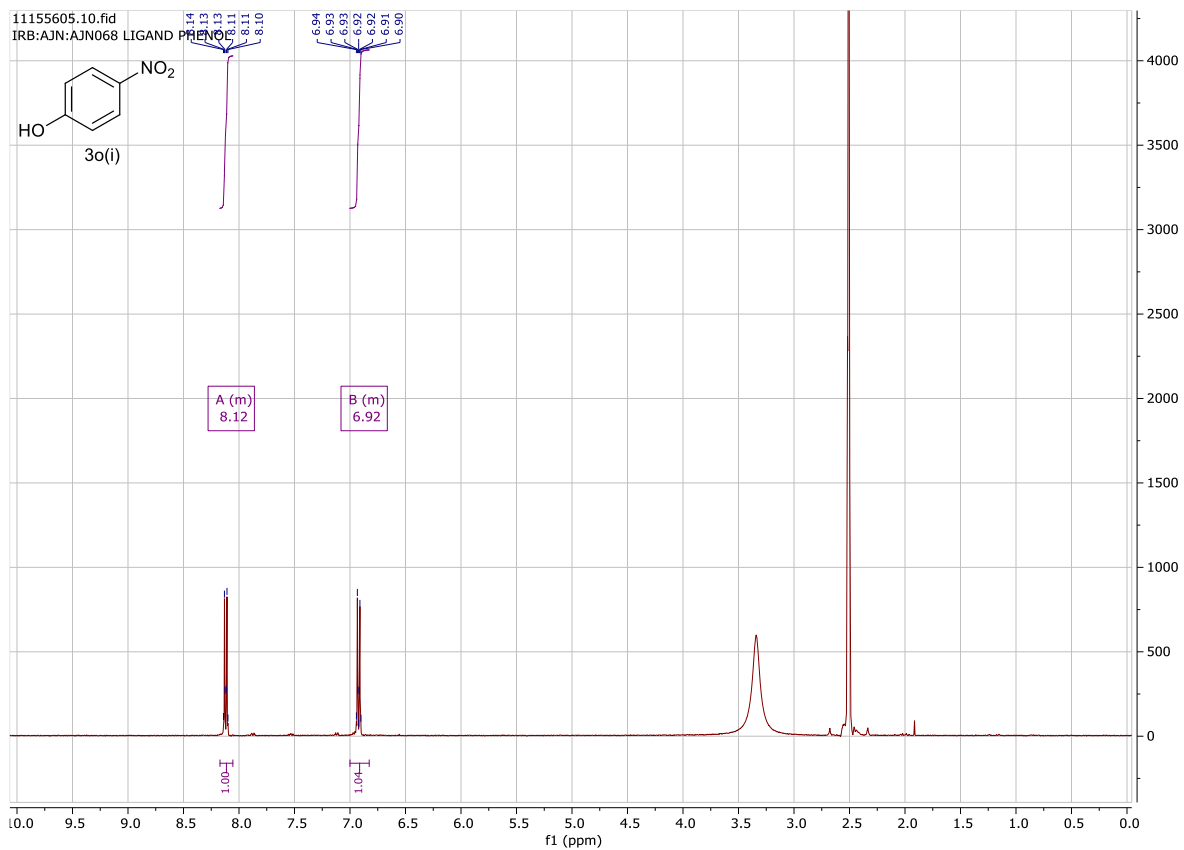



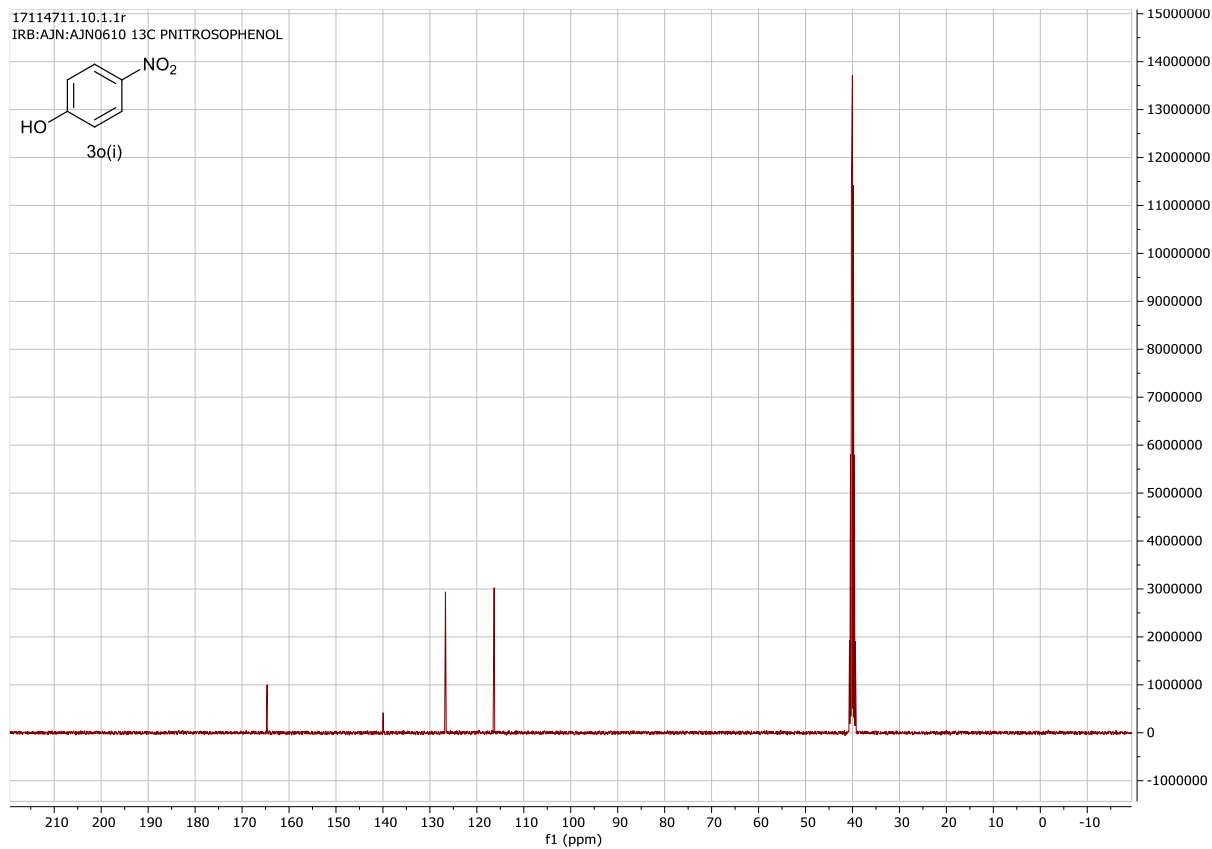

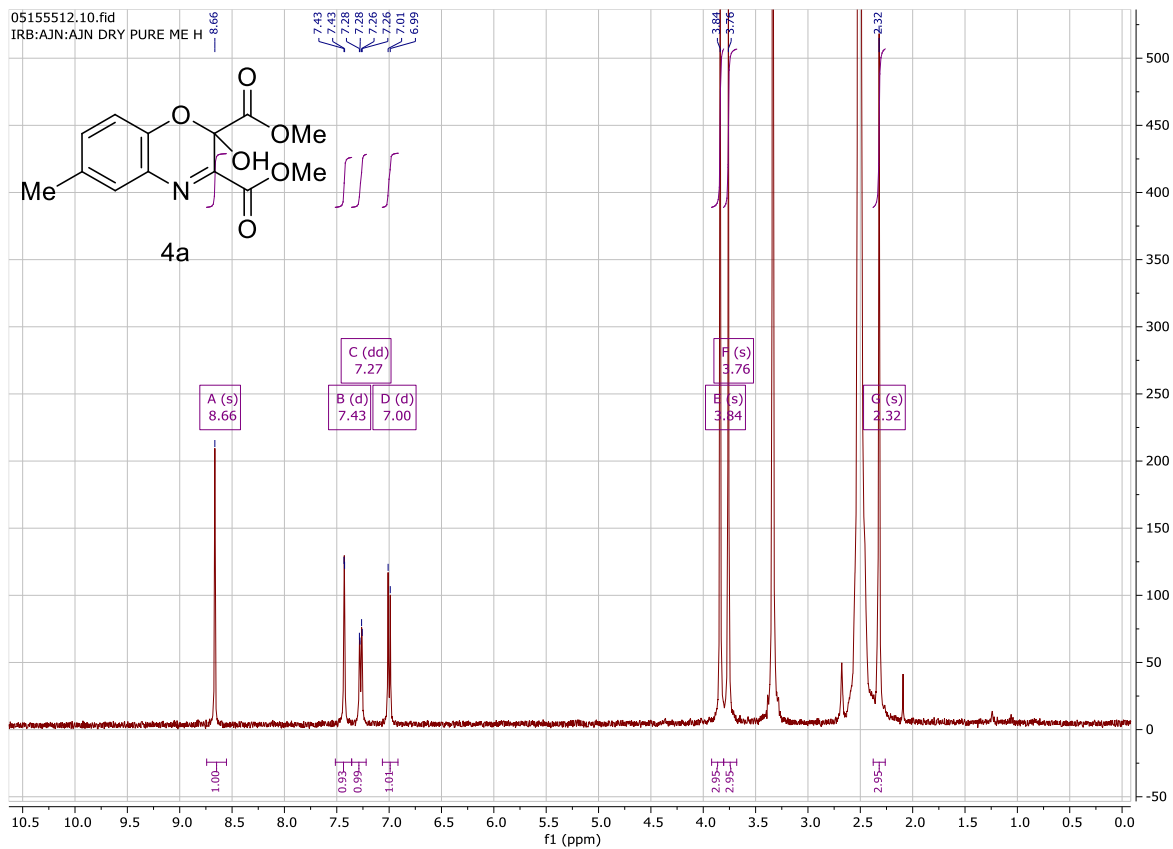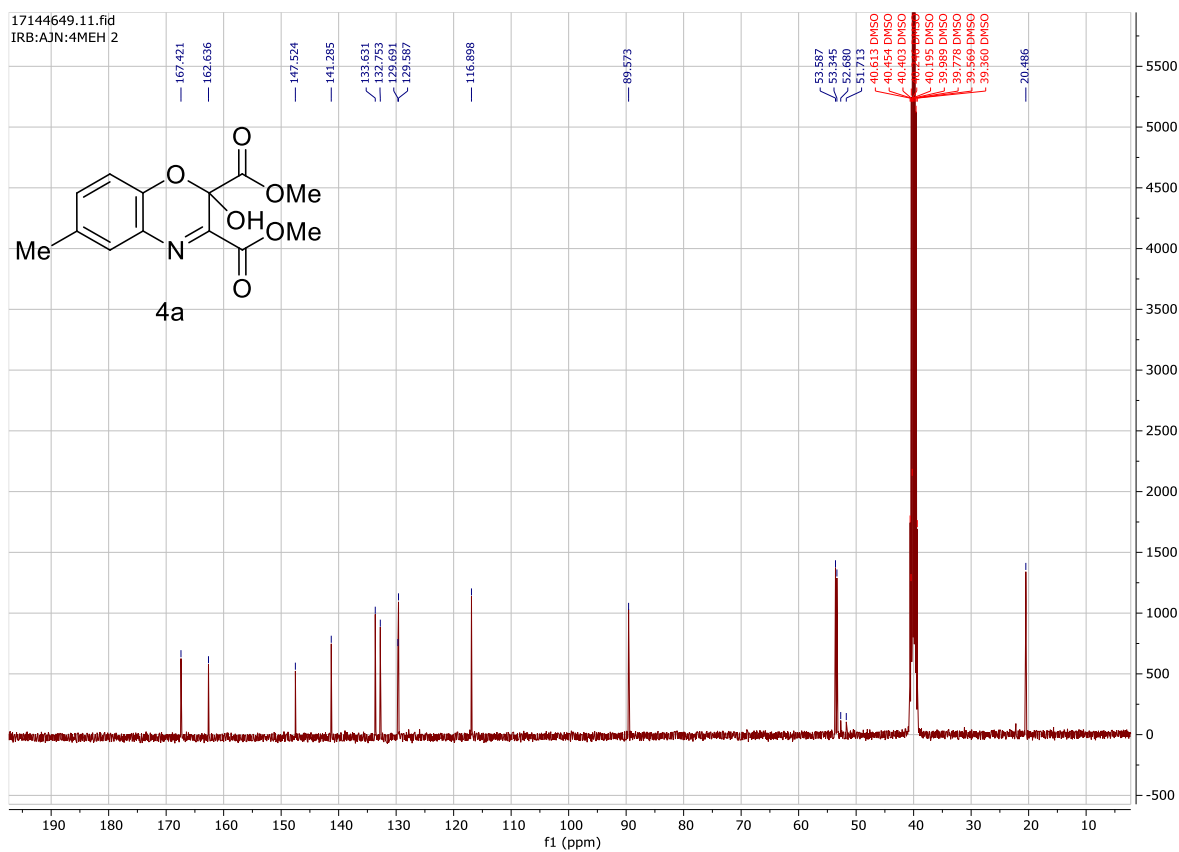

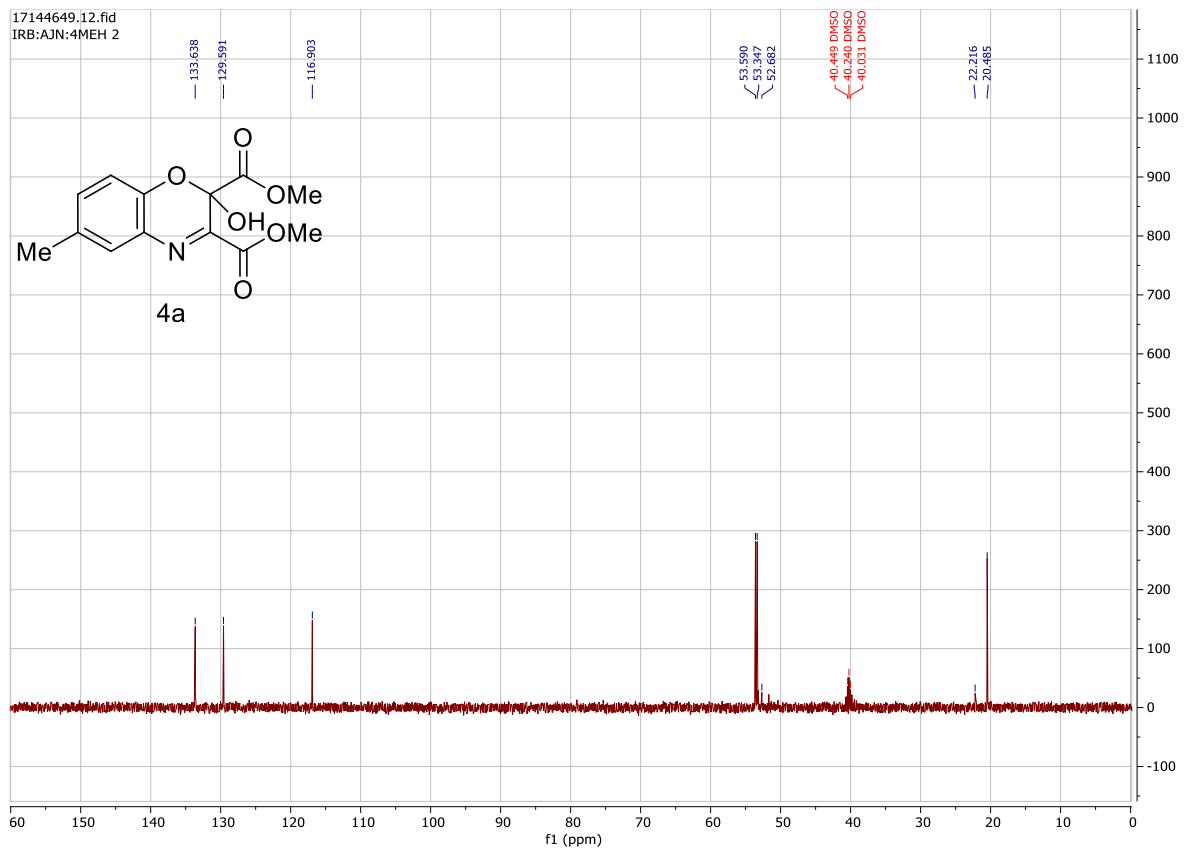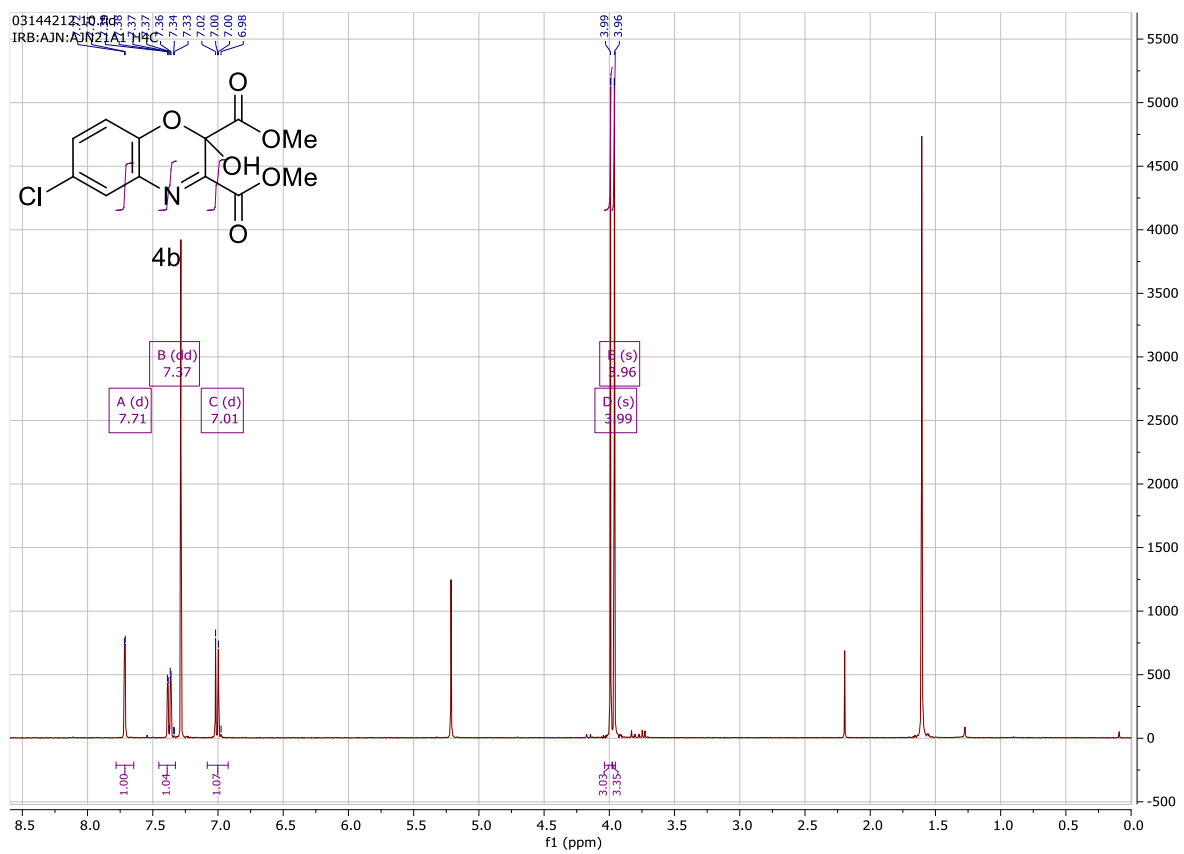

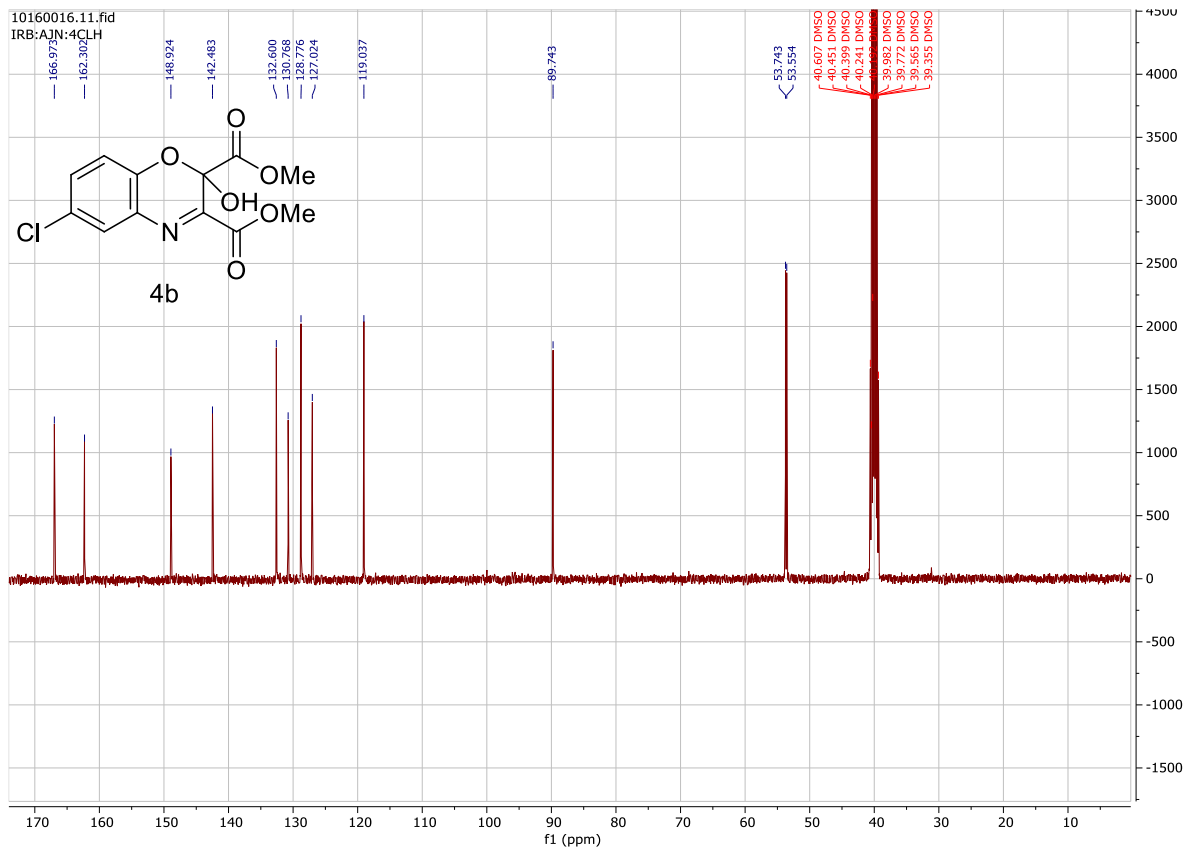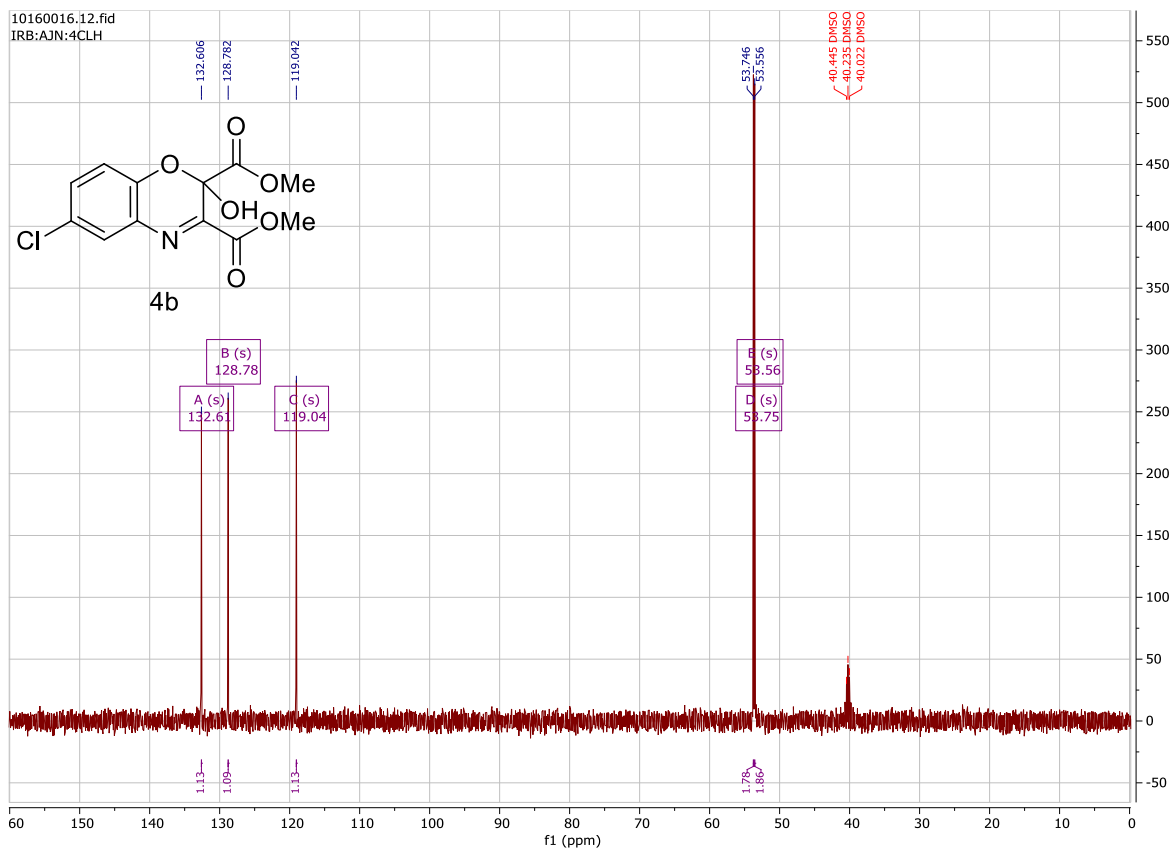

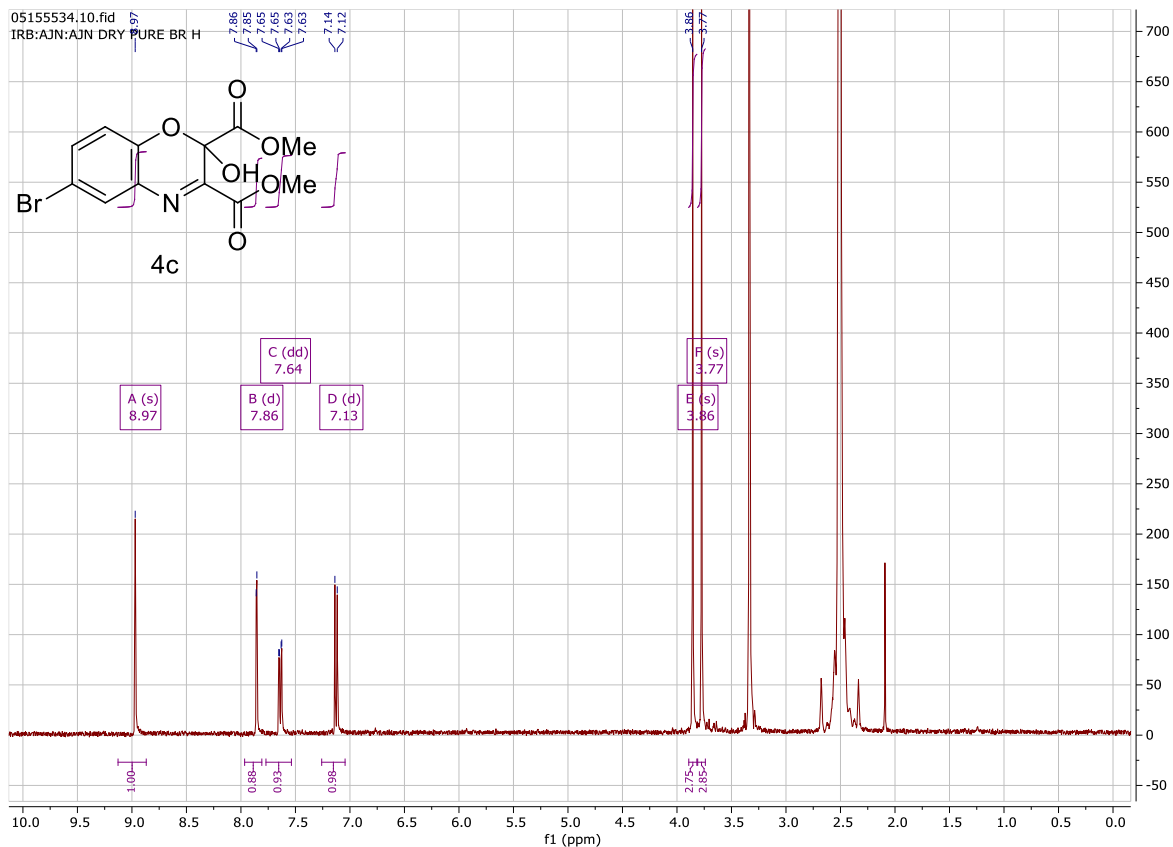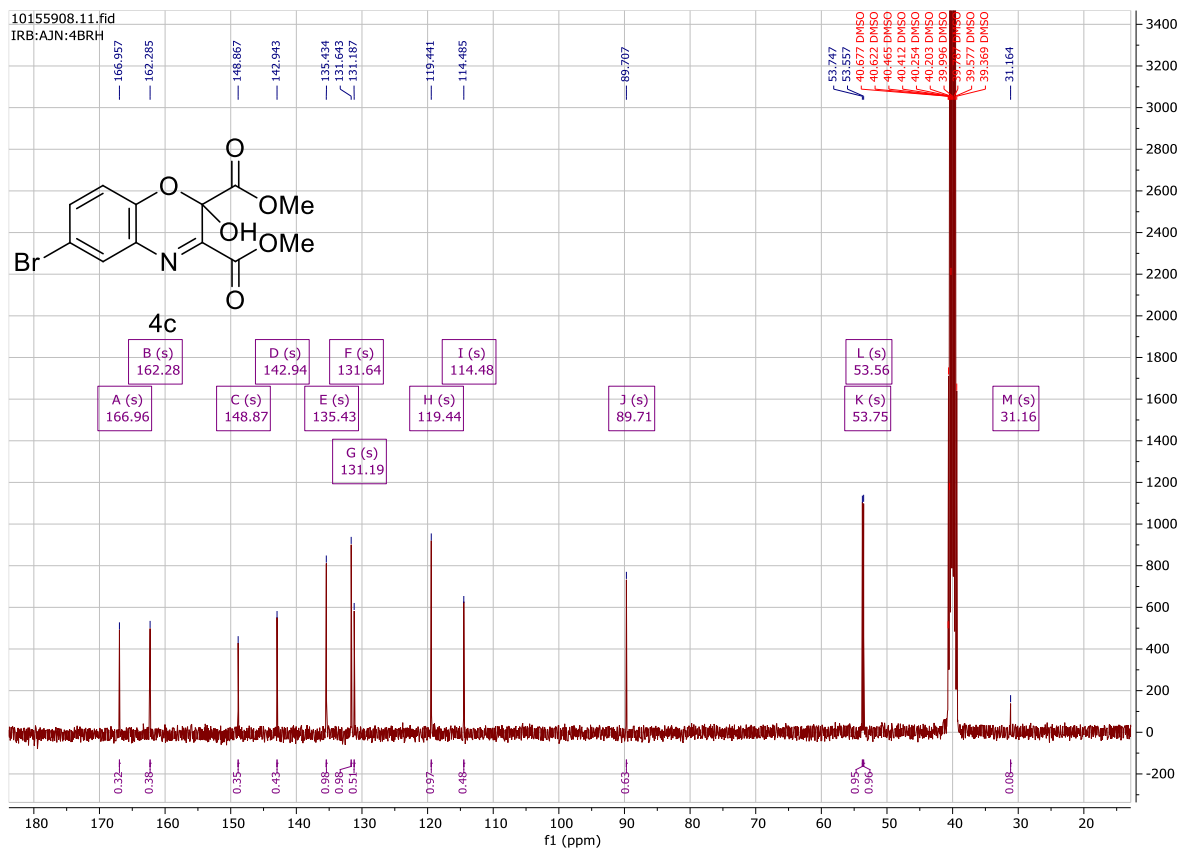

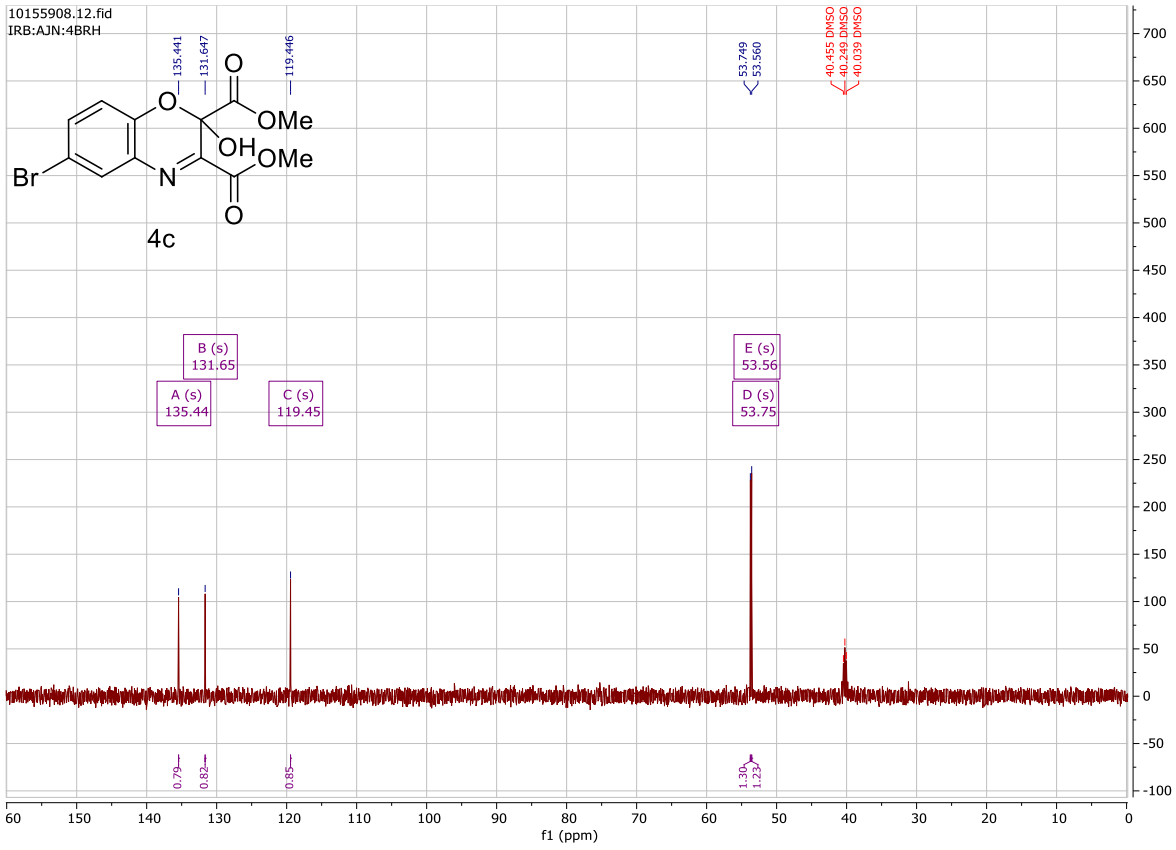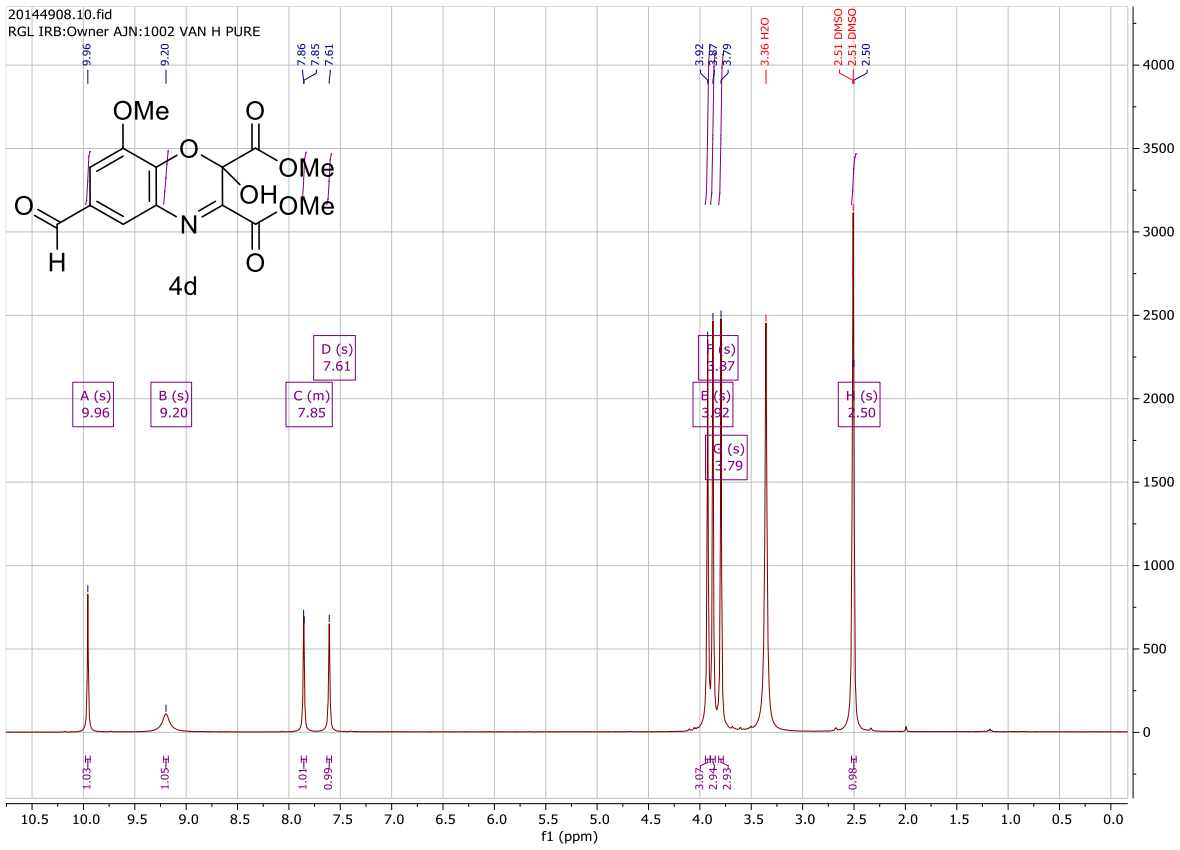

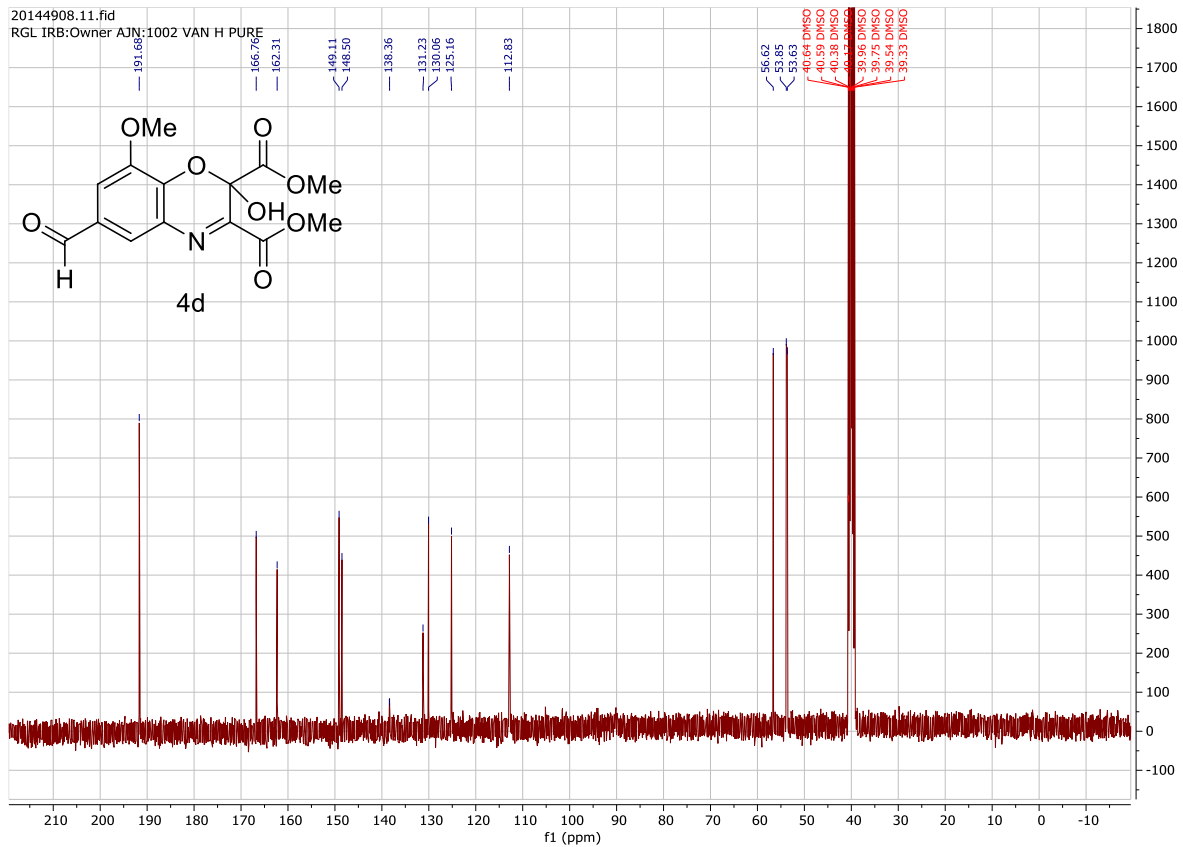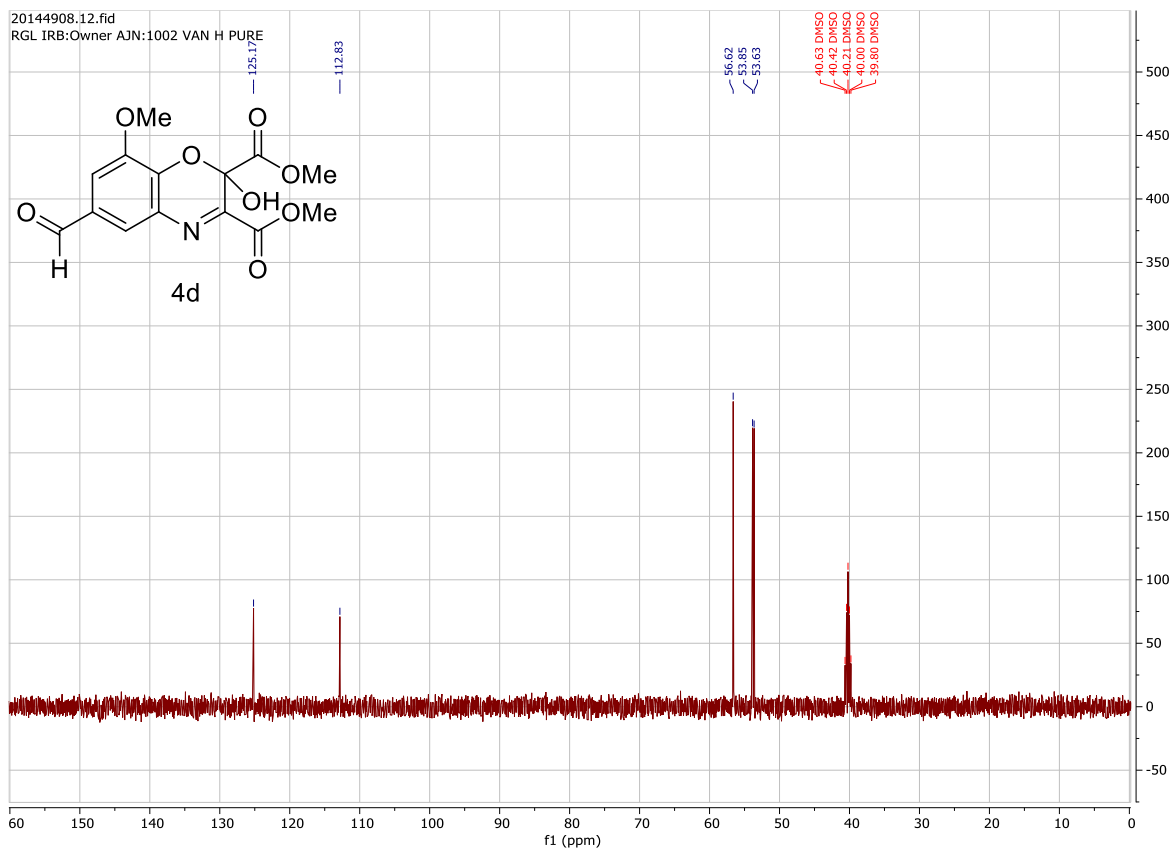

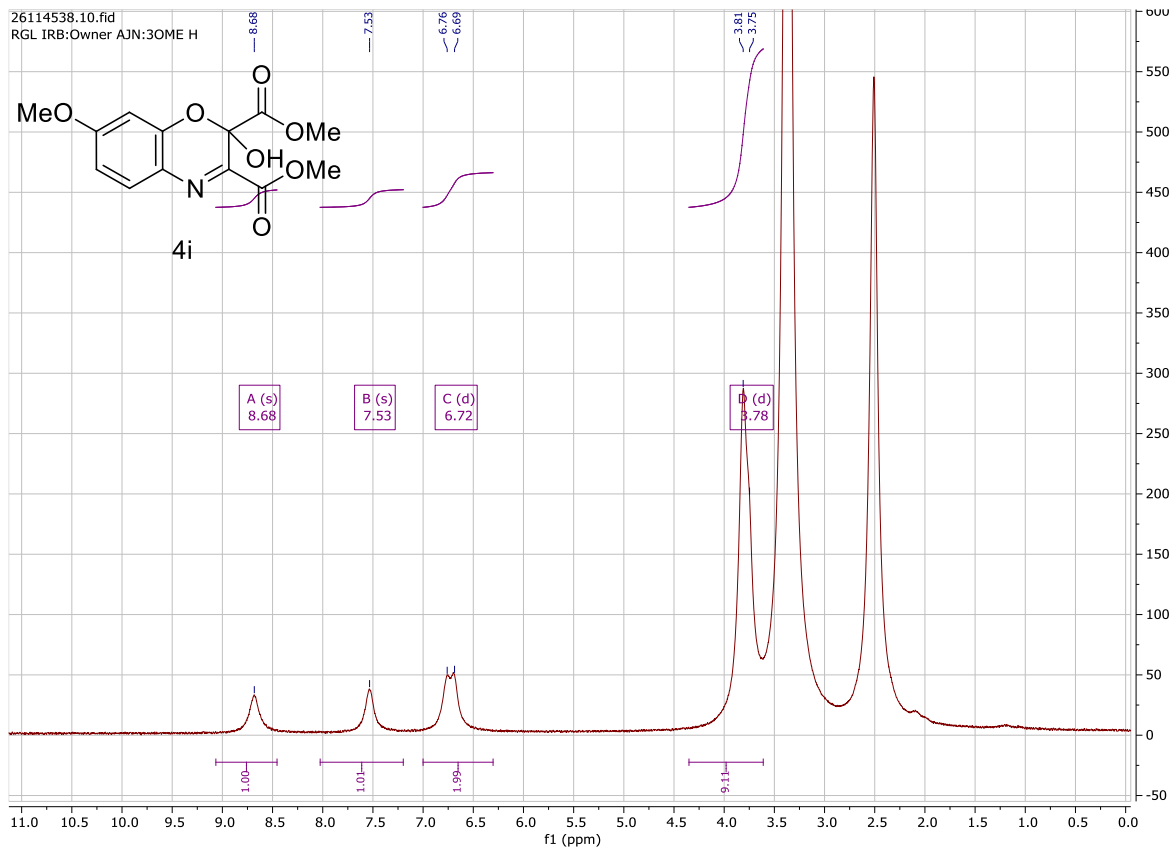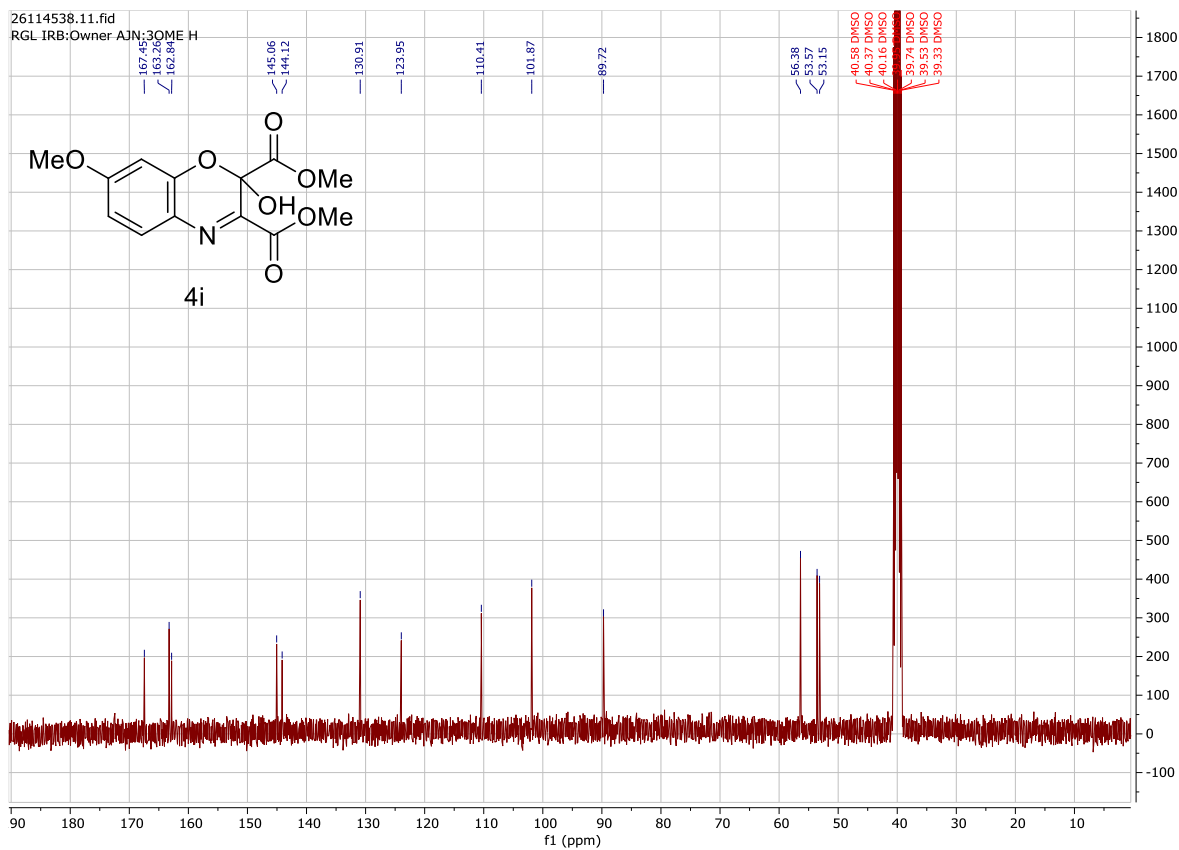



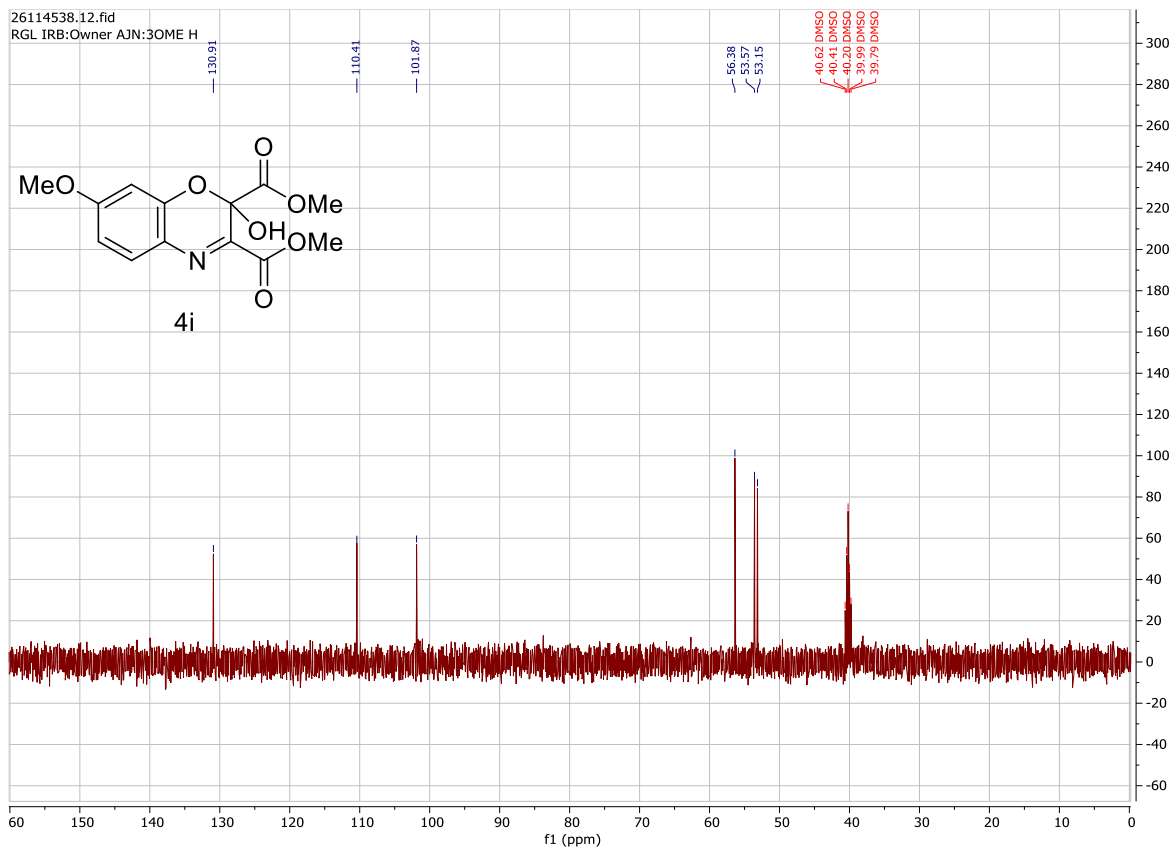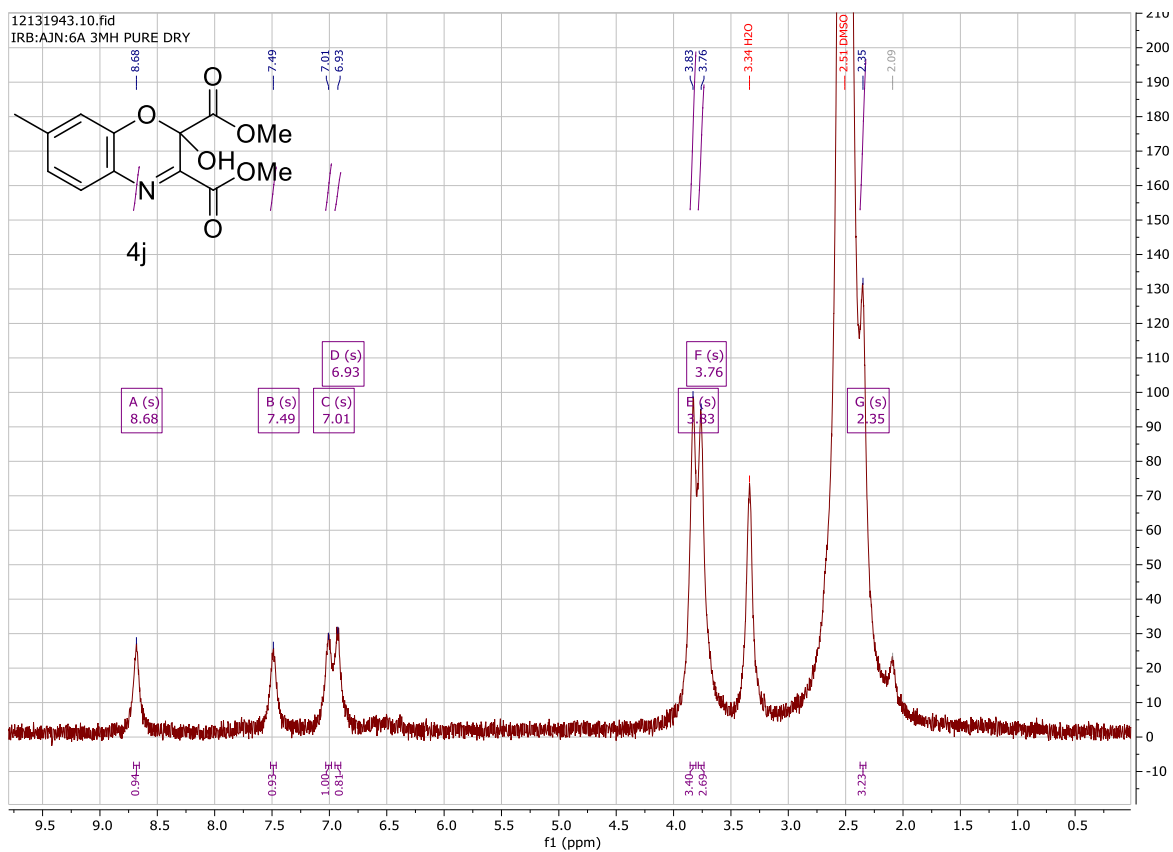

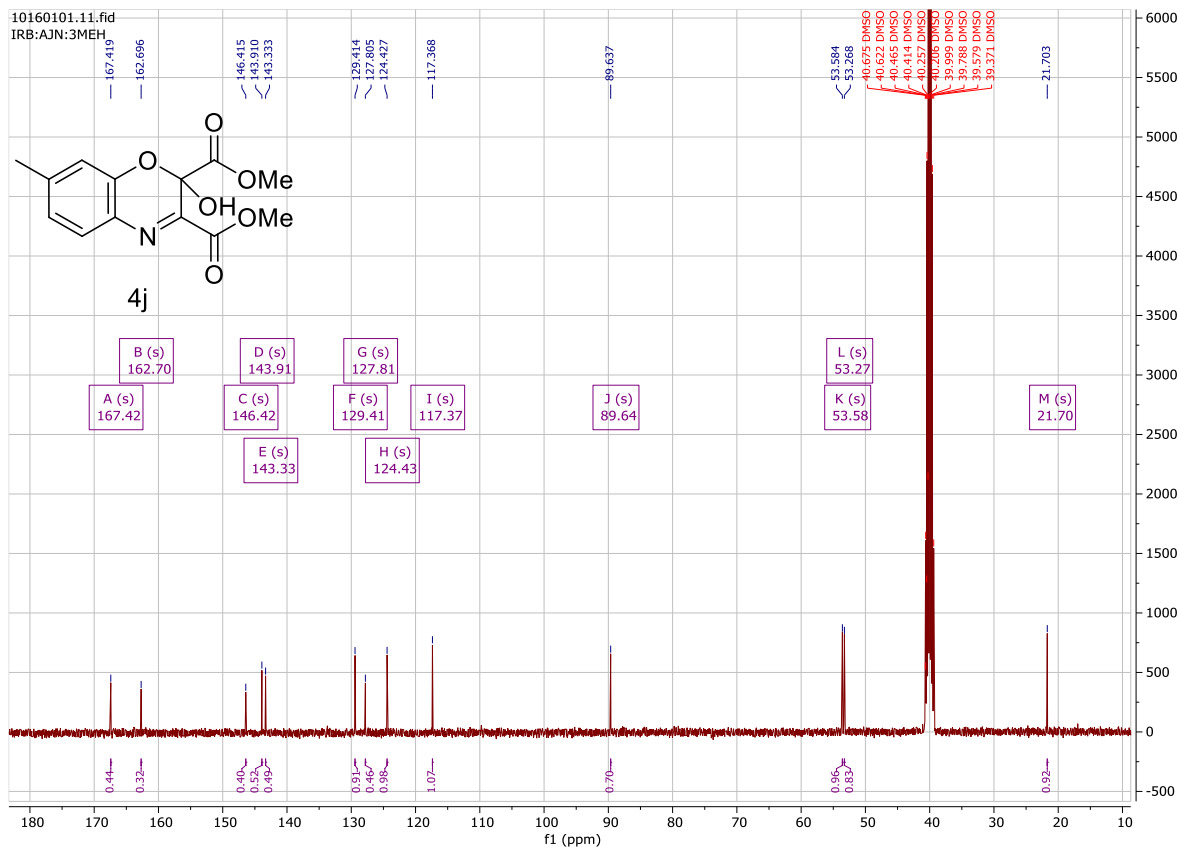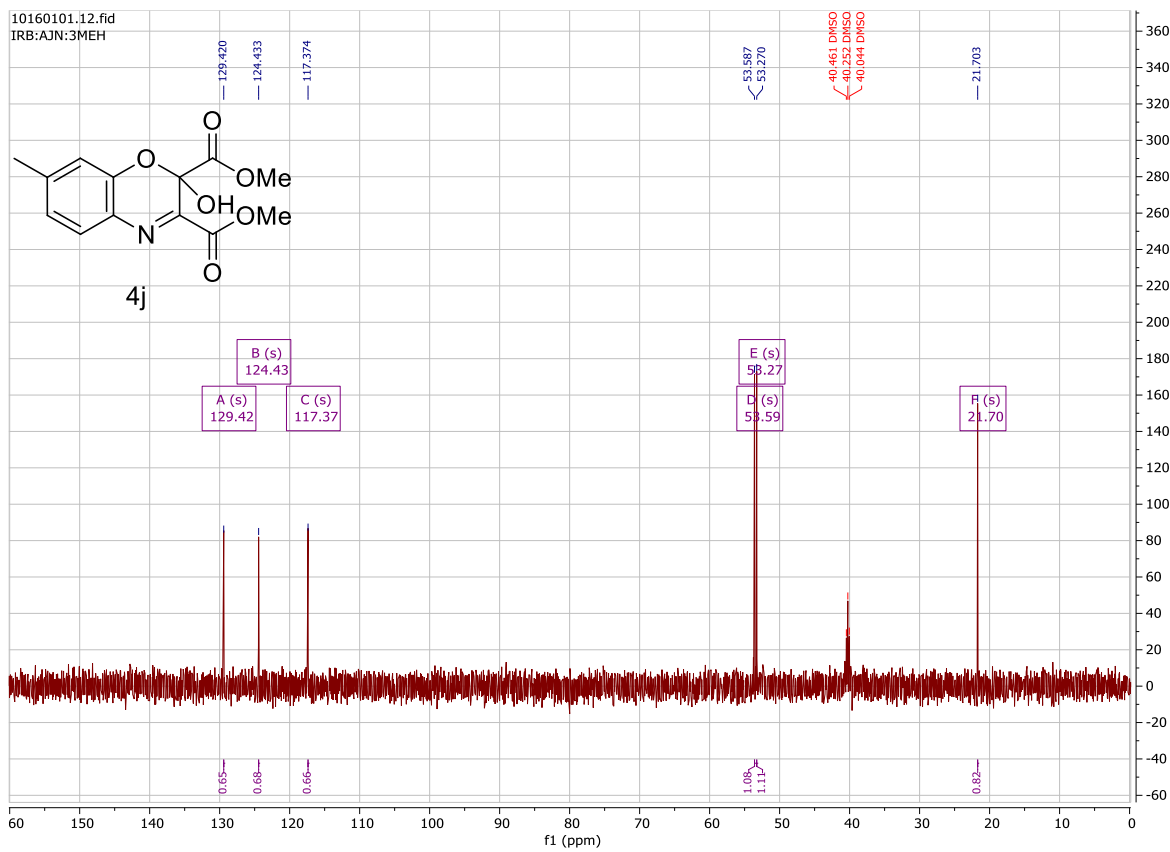

# Accurate Mass Spectra of Selected compounds:

## Elemental Composition Report

Page 1

### Single Mass Analysis

Tolerance = 5.0 mDa / DBE: min = -1.5, max = 50.0

Element prediction: Off

Number of isotope peaks used for i-FIT = 3

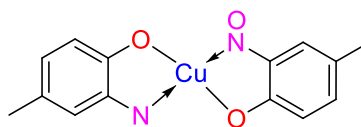

2a, 82% yield

Monoisotopic Mass, Even Electron Ions

815 formula(e) evaluated with 10 results within limits (up to 50 closest results for each mass)

Elements Used:

C: 0-35 H: 0-60 N: 0-3 O: 0-5 Cl: 0-2 I: 0-2 63Cu: 0-1

LCT Premier  
1: TOF MS AP+

350 °C

AJN\_4M\_4148 79 (0.633) Cm (77:79)

4.76e+004

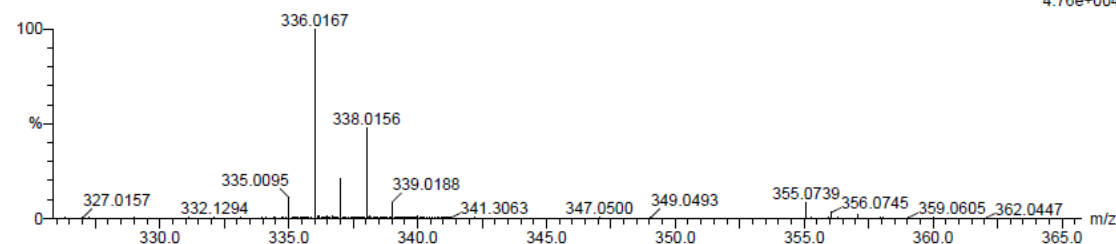

Minimum: 5.0 5.0 -1.5  
Maximum: 5.0 5.0 50.0

| Mass     | Calc. Mass | mDa  | PPM   | DBE  | i-FIT | i-FIT (Norm) | Formula            |
|----------|------------|------|-------|------|-------|--------------|--------------------|
| 336.0167 | 336.0171   | -0.4 | -1.2  | 9.5  | 458.6 | 8.6          | C14 H13 N2 O4 63Cu |
|          | 336.0176   | -0.9 | -2.7  | 15.5 | 450.7 | 0.7          | C17 H7 N3 O3 Cl    |
|          | 336.0154   | 1.3  | 3.9   | 6.5  | 452.7 | 2.8          | C11 H12 N3 O5 Cl2  |
|          | 336.0190   | -2.3 | -6.8  | 4.5  | 452.0 | 2.0          | C13 H18 O4 Cl 63Cu |
|          | 336.0194   | -2.7 | -8.0  | 10.5 | 452.3 | 2.3          | C16 H12 N O3 Cl2   |
|          | 336.0198   | -3.1 | -9.2  | 24.5 | 458.9 | 8.9          | C23 H2 N3 O        |
|          | 336.0209   | -4.2 | -12.5 | 4.5  | 458.7 | 8.7          | C10 H15 N3 O2 I    |
|          | 336.0124   | 4.3  | 12.8  | -1.5 | 459.2 | 9.2          | C8 H22 N2 I 63Cu   |

## Elemental Composition Report

Page 1

### Single Mass Analysis

Tolerance = 5.0 mDa / DBE: min = -1.5, max = 50.0

Element prediction: Off

Number of isotope peaks used for i-FIT = 3

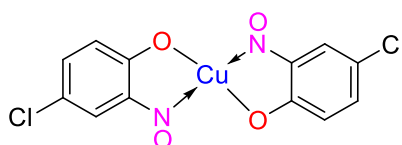

2b, 55% yield

Monoisotopic Mass, Odd and Even Electron Ions

989 formula(e) evaluated with 11 results within limits (up to 50 closest results for each mass)

Elements Used:

C: 0-35 H: 0-60 N: 0-4 O: 0-8 Cl: 0-2 63Cu: 0-1

LCT Premier  
1: TOF MS AP+

350 °C

AJN\_4CL\_4168 102 (0.825) Cm (102:116-13:88)

1.73e+005

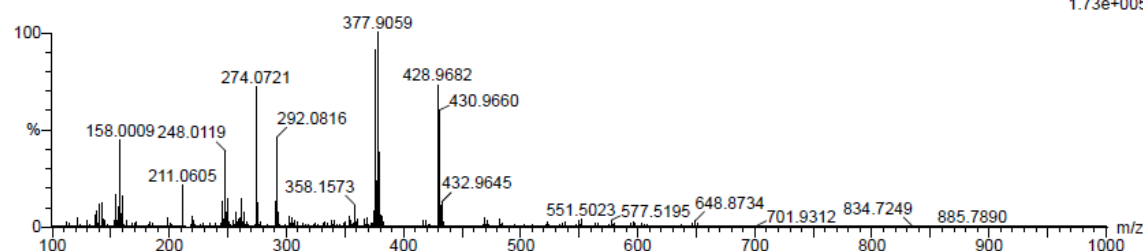

Minimum: 5.0 5.0 -1.5  
Maximum: 5.0 5.0 50.0

| Mass     | Calc. Mass | mDa  | PPM  | DBE  | i-FIT | i-FIT (Norm) | Formula                   |
|----------|------------|------|------|------|-------|--------------|---------------------------|
| 374.8990 | 374.8991   | -0.1 | -0.3 | 19.0 | 634.2 | 1.2          | C18 O6 63Cu               |
|          | 374.8996   | -0.6 | -1.6 | 14.5 | 635.9 | 2.9          | C15 H3 N O5 Cl            |
|          | 374.8982   | 0.8  | 2.1  | 15.0 | 636.0 | 3.0          | 63Cu<br>C13 H N4 O4 Cl    |
|          | 374.9001   | -1.1 | -2.9 | 10.0 | 635.8 | 2.8          | 63Cu<br>C12 H6 N2 O4 Cl2  |
|          | 374.8974   | 1.6  | 4.3  | 5.5  | 635.9 | 2.9          | 63Cu<br>C9 H8 N O7 Cl2    |
|          | 374.8969   | 2.1  | 5.6  | 10.0 | 636.0 | 3.0          | 63Cu<br>C12 H5 O8 Cl 63Cu |
|          | 374.8960   | 3.0  | 8.0  | 6.0  | 636.0 | 3.0          | 63Cu<br>C7 H6 N4 O6 Cl2   |
|          | 374.9023   | -3.3 | -8.8 | 19.0 | 635.8 | 2.8          | 63Cu<br>C18 H N2 O2 Cl    |

Elemental Composition Report

Single Mass Analysis

Tolerance = 5.0 PPM / DBE: min = -1.5, max = 50.0  
 Element prediction: Off  
 Number of isotope peaks used for i-FIT = 3

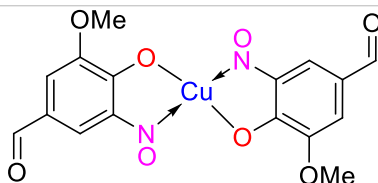

2d, 63% yield

Monoisotopic Mass, Even Electron Ions  
 506 formula(e) evaluated with 3 results within limits (up to 50 best isotopic matches for each mass)  
 Elements Used:  
 C: 0-60 H: 0-120 N: 0-5 O: 0-8 63Cu: 0-1

AJN\_VAN\_128456 97 (0.776) Cm (85:104)

1: TOF MS AP+  
1.67e+005

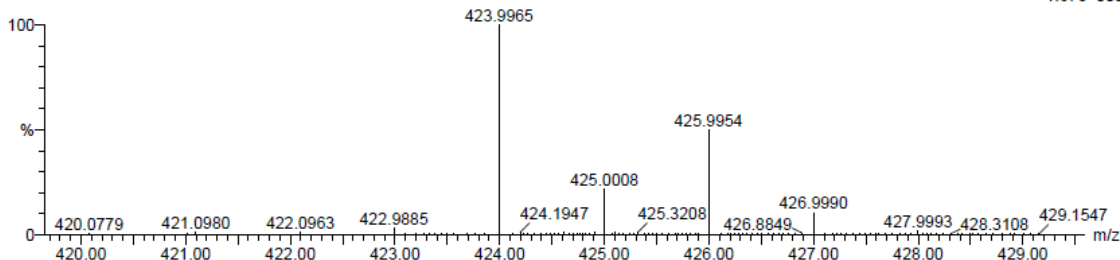

Minimum: -1.5  
 Maximum: 5.0 5.0 50.0

| Mass     | Calc. Mass | mDa  | PPM  | DBE  | i-FIT | i-FIT (Norm) | Formula            |
|----------|------------|------|------|------|-------|--------------|--------------------|
| 423.9965 | 423.9954   | 1.1  | 2.6  | 22.5 | 689.2 | 0.9          | C20 H2 N5 O7       |
|          | 423.9968   | -0.3 | -0.7 | 11.5 | 689.3 | 1.0          | C16 H13 N2 O8 63Cu |
|          | 423.9949   | 1.6  | 3.8  | 24.5 | 689.9 | 1.6          | C28 H9 O 63Cu      |

Elemental Composition Report

Single Mass Analysis

Tolerance = 5.0 mDa / DBE: min = -1.5, max = 50.0  
 Element prediction: Off  
 Number of isotope peaks used for i-FIT = 3

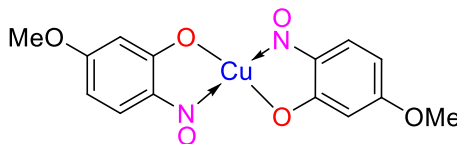

2h, 86% yield

Monoisotopic Mass, Odd and Even Electron Ions  
 366 formula(e) evaluated with 7 results within limits (up to 50 closest results for each mass)  
 Elements Used:  
 C: 0-35 H: 0-60 N: 0-4 O: 0-8 63Cu: 0-1

LCT Premier  
 1: TOF MS AP+

350 °C

AJN\_3OME\_4169 116 (0.929) Cm (116:122-(24:84+213:246))

7.84e+003

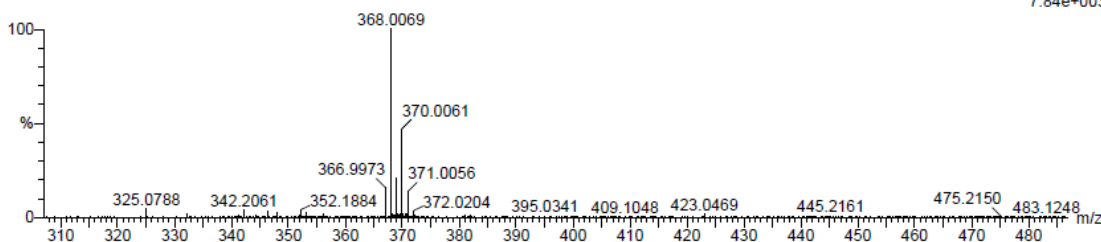

Minimum: -1.5  
 Maximum: 5.0 5.0 50.0

| Mass     | Calc. Mass | mDa  | PPM   | DBE  | i-FIT | i-FIT (Norm) | Formula            |
|----------|------------|------|-------|------|-------|--------------|--------------------|
| 366.9973 | 366.9991   | -1.8 | -4.9  | 10.0 | 209.4 | 1.8          | C14 H12 N2 O6 63Cu |
|          | 366.9991   | -1.8 | -4.9  | 20.5 | 209.4 | 1.7          | C20 H3 N2 O6       |
|          | 366.9951   | 2.2  | 6.0   | 16.5 | 209.8 | 2.1          | C15 H3 N4 O8       |
|          | 366.9951   | 2.2  | 6.0   | 6.0  | 209.9 | 2.3          | C9 H12 N4 O8 63Cu  |
|          | 366.9933   | 4.0  | 10.9  | 19.0 | 209.9 | 2.3          | C21 H8 N2 O 63Cu   |
|          | 367.0018   | -4.5 | -12.3 | 25.0 | 209.4 | 1.8          | C23 H N3 O3        |
|          | 367.0018   | -4.5 | -12.3 | 14.5 | 209.5 | 1.8          | C17 H10 N3 O3 63Cu |

Elemental Composition Report

Single Mass Analysis

Tolerance = 5.0 mDa / DBE: min = -1.5, max = 50.0

Element prediction: Off

Number of isotope peaks used for i-FIT = 3

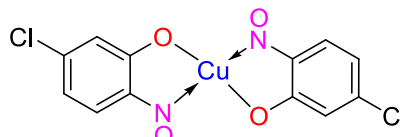

2i, 73% yield

Monoisotopic Mass, Even Electron Ions

1011 formula(e) evaluated with 8 results within limits (up to 50 closest results for each mass)

Elements Used:

C: 0-35 H: 0-60 N: 0-3 O: 0-5 Cl: 0-2 I: 0-2 63Cu: 0-1

LCT Premier  
1: TOF MS AP+

350 °C

AJN\_3C\_4149 98 (0.786) Cm (93:104)

1.33e+005

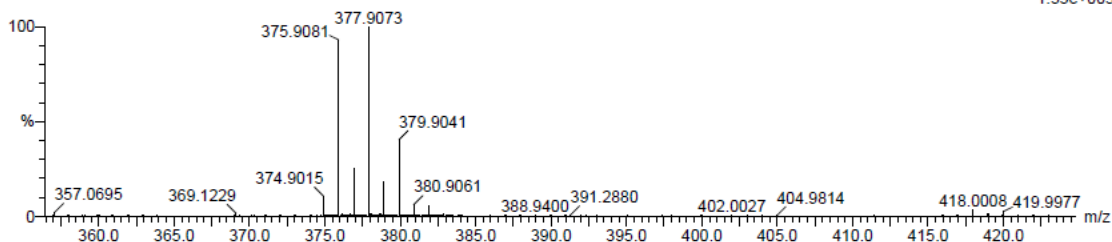

Minimum: -1.5  
Maximum: 50.0

| Mass     | Calc. Mass | mDa  | PPM   | DBE  | i-FIT | i-FIT (Norm) | Formula                   |
|----------|------------|------|-------|------|-------|--------------|---------------------------|
| 375.9081 | 375.9079   | 0.2  | 0.5   | 9.5  | 655.7 | 1.3          | C12 H7 N2 O4 Cl2<br>63Cu  |
|          | 375.9101   | -2.0 | -5.3  | 18.5 | 657.8 | 3.4          | C18 H2 N2 O2 Cl<br>63Cu   |
|          | 375.9059   | 2.2  | 5.9   | 2.5  | 660.0 | 5.6          | C8 H12 N I2               |
|          | 375.9107   | -2.6 | -6.9  | 13.5 | 659.6 | 5.2          | C14 H3 N O4 I             |
|          | 375.9112   | -3.1 | -8.2  | -1.5 | 658.5 | 4.0          | C5 H15 N2 O3 Cl I<br>63Cu |
|          | 375.9117   | -3.6 | -9.6  | 4.5  | 656.2 | 1.7          | C8 H9 N3 O2 Cl2 I         |
|          | 375.9119   | -3.8 | -10.1 | 13.5 | 655.4 | 1.0          | C17 H7 O2 Cl2 63Cu        |
|          | 375.9031   | 5.0  | 13.3  | -1.5 | 656.7 | 2.2          | C6 H16 N2 Cl2 I<br>63Cu   |

Elemental Composition Report

Single Mass Analysis

Tolerance = 5.0 mDa / DBE: min = -1.5, max = 50.0

Element prediction: Off

Number of isotope peaks used for i-FIT = 3

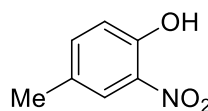

3a, 14 % yield

Monoisotopic Mass, Odd and Even Electron Ions

114 formula(e) evaluated with 5 results within limits (up to 50 closest results for each mass)

Elements Used:

C: 0-50 H: 0-80 N: 0-5 O: 0-8 Br: 0-2 127I: 0-1

LCT Premier  
1: TOF MS AP+

350 °C

AJN\_4M2NP\_3665 47 (0.376) Cm (45:47)

9.84e+002

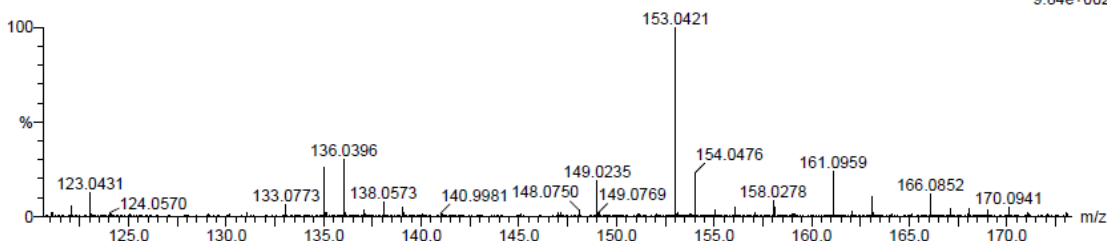

Minimum: -1.5  
Maximum: 50.0

| Mass     | Calc. Mass | mDa  | PPM   | DBE | i-FIT | i-FIT (Norm) | Formula     |
|----------|------------|------|-------|-----|-------|--------------|-------------|
| 153.0421 | 153.0426   | -0.5 | -3.3  | 5.0 | 159.5 | 1.5          | C7 H7 N O3  |
|          | 153.0413   | 0.8  | 5.2   | 5.5 | 160.4 | 2.5          | C5 H5 N4 O2 |
|          | 153.0399   | 2.2  | 14.4  | 0.5 | 160.3 | 2.4          | C4 H9 O6    |
|          | 153.0453   | -3.2 | -20.9 | 9.5 | 158.5 | 0.5          | C10 H5 N2   |
|          | 153.0386   | 3.5  | 22.9  | 1.0 | 161.4 | 3.4          | C2 H7 N3 O5 |

## Elemental Composition Report

Page 1

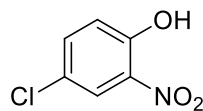

3b, 5 % yield

### Single Mass Analysis

Tolerance = 3.0 mDa / DBE: min = -1.5, max = 50.0

Element prediction: Off

Number of isotope peaks used for i-FIT = 3

Monoisotopic Mass, Even Electron Ions

552 formula(e) evaluated with 7 results within limits (up to 500 best isotopic matches for each mass)

Elements Used:

C: 0-60 H: 0-80 N: 0-10 O: 0-10 S: 0-3 Cl: 0-2

Alexander Nicholls

15-Mar-2016

4Cl-LNO2 638 (3.157) Cm (634:690)

1: TOF MS ES-  
1.89e+004

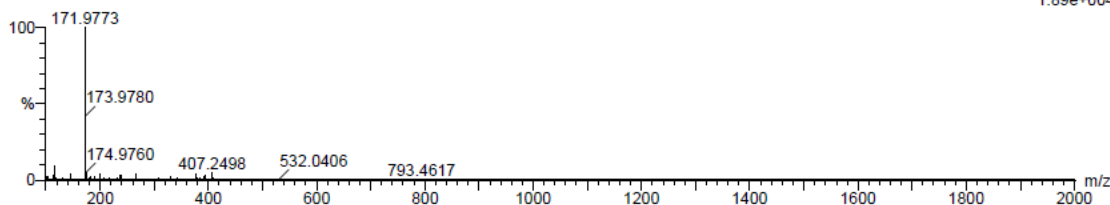

Minimum: -1.5  
Maximum: 3.0 5.0 50.0

| Mass     | Calc. Mass | mDa  | PPM   | DBE | i-FIT | i-FIT (Norm) | Formula        |
|----------|------------|------|-------|-----|-------|--------------|----------------|
| 171.9773 | 171.9801   | -2.8 | -16.3 | 5.5 | 368.0 | 0.3          | C6 H3 N O3 Cl  |
|          | 171.9770   | 0.3  | 1.7   | 0.5 | 369.3 | 1.6          | C2 H7 N3 S2 Cl |
|          | 171.9761   | 1.2  | 7.0   | 1.5 | 371.6 | 3.8          | C H3 N3 O5 Cl  |
|          | 171.9755   | 1.8  | 10.5  | 0.5 | 371.7 | 4.0          | C4 H8 N S Cl2  |
|          | 171.9793   | -2.0 | -11.6 | 1.5 | 373.0 | 5.2          | C H4 N5 O Cl2  |
|          | 171.9752   | 2.1  | 12.2  | 5.5 | 374.5 | 6.8          | C3 H2 N5 S2    |
|          | 171.9785   | -1.2 | -7.0  | 0.5 | 374.8 | 7.1          | H6 N5 S3       |

## Elemental Composition Report

Page 1

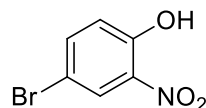

3c, 9 % yield

### Single Mass Analysis

Tolerance = 3.0 mDa / DBE: min = -1.5, max = 50.0

Element prediction: Off

Number of isotope peaks used for i-FIT = 3

Monoisotopic Mass, Even Electron Ions

636 formula(e) evaluated with 5 results within limits (up to 500 best isotopic matches for each mass)

Elements Used:

C: 0-60 H: 0-80 N: 0-10 O: 0-10 <sup>23</sup>Na: 0-1 Br: 0-2 <sup>127</sup>I: 0-1

Alexander Nicholls

17-Mar-2016

4BRLNO2 656 (3.239) Cm (654:658)

1: TOF MS ES-  
3.69e+003

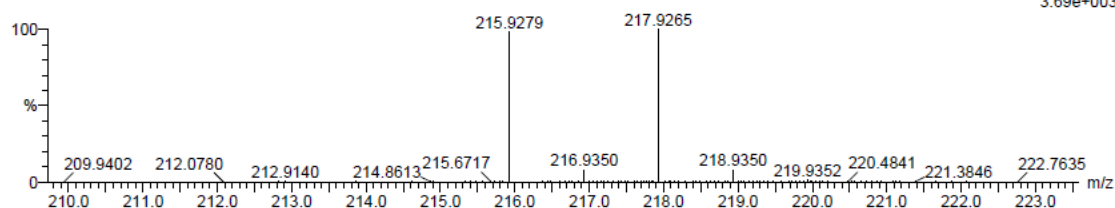

Minimum: -1.5  
Maximum: 3.0 5.0 50.0

| Mass     | Calc. Mass | mDa  | PPM  | DBE | i-FIT | i-FIT (Norm) | Formula                                   |
|----------|------------|------|------|-----|-------|--------------|-------------------------------------------|
| 215.9279 | 215.9296   | -1.7 | -7.9 | 5.5 | 172.0 | 0.0          | C6 H3 N O3 Br                             |
|          | 215.9272   | 0.7  | 3.2  | 2.5 | 176.2 | 4.1          | C4 H4 N O3 <sup>23</sup> Na Br            |
|          | 215.9256   | 2.3  | 10.7 | 1.5 | 180.6 | 8.5          | C H3 N3 O5 Br                             |
|          | 215.9270   | 0.9  | 4.2  | 1.5 | 190.6 | 18.5         | C H3 N3 O2 <sup>127</sup> I               |
|          | 215.9286   | -0.7 | -3.2 | 2.5 | 191.1 | 19.1         | C4 H4 N <sup>23</sup> Na <sup>127</sup> I |

## Elemental Composition Report

### Single Mass Analysis

Tolerance = 3.0 mDa / DBE: min = -1.5, max = 100.0

Element prediction: Off

Number of isotope peaks used for i-FIT = 5

Monoisotopic Mass, Even Electron Ions

400 formula(e) evaluated with 3 results within limits (up to 500 closest results for each mass)

Elements Used:

C: 0-60 H: 0-50 N: 0-6 O: 0-8 S: 0-4

QToF Premier

26-Sep-2019

AJN\_3NET\_L\_135718 313 (2.668) Cm (313:330)

1: TOF MS ES+  
9.77e+004

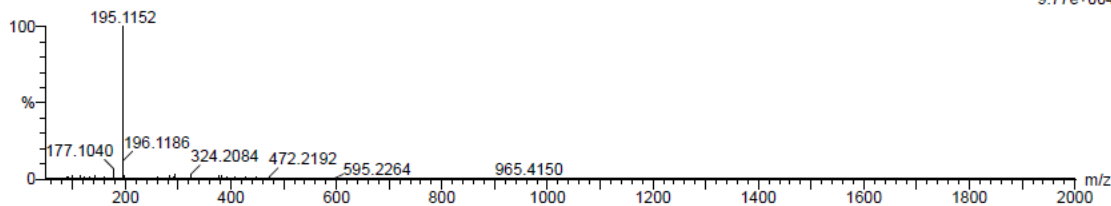

Minimum: -1.5  
Maximum: 3.0 5.0 100.0

| Mass     | Calc. Mass | mDa  | PPM   | DBE  | i-FIT | i-FIT (Norm) | Formula        |
|----------|------------|------|-------|------|-------|--------------|----------------|
| 195.1152 | 195.1167   | -1.5 | -7.7  | -0.5 | 842.0 | 6.7          | C7 H19 N2 O2 S |
|          | 195.1134   | 1.8  | 9.2   | 4.5  | 835.3 | 0.0          | C10 H15 N2 O2  |
|          | 195.1174   | -2.2 | -11.3 | 8.5  | 840.4 | 5.1          | C15 H15        |

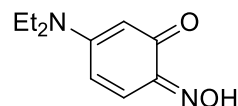

Page 1

3g, 84 % yield

## Elemental Composition Report

### Single Mass Analysis

Tolerance = 5.0 mDa / DBE: min = -1.5, max = 50.0

Element prediction: Off

Number of isotope peaks used for i-FIT = 3

Monoisotopic Mass, Even Electron Ions

148 formula(e) evaluated with 4 results within limits (up to 500 best isotopic matches for each mass)

Elements Used:

C: 0-50 H: 0-50 N: 0-3 O: 0-9 S: 0-3 191I: 0-1

Alexander Nicholls

22-Feb-2016

AN3OMEL 232 (1.938) Cm (232:237)

1: TOF MS ES+  
1.22e+004

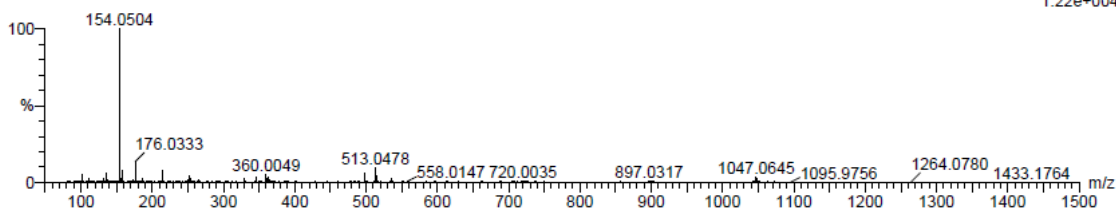

Minimum: -1.5  
Maximum: 5.0 5.0 50.0

| Mass     | Calc. Mass | mDa  | PPM   | DBE  | i-FIT | i-FIT (Norm) | Formula       |
|----------|------------|------|-------|------|-------|--------------|---------------|
| 154.0504 | 154.0504   | 0.0  | 0.0   | 4.5  | 406.4 | 0.0          | C7 H8 N O3    |
|          | 154.0464   | 4.0  | 26.0  | 0.5  | 411.8 | 5.4          | C2 H8 N3 O5   |
|          | 154.0538   | -3.4 | -22.1 | -0.5 | 415.5 | 9.1          | C4 H12 N O3 S |
|          | 154.0473   | 3.1  | 20.1  | -0.5 | 418.1 | 11.7         | C3 H12 N3 S2  |

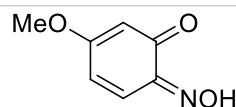

Page 1

3h, 79 % yield

Elemental Composition Report

Single Mass Analysis

Tolerance = 5.0 PPM / DBE: min = -1.5, max = 50.0

Element prediction: Off

Number of isotope peaks used for i-FIT = 3

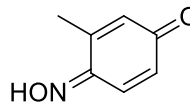

3j(i)

Monoisotopic Mass, Even Electron Ions

615 formula(e) evaluated with 3 results within limits (up to 500 best isotopic matches for each mass)

Elements Used:

C: 0-40 H: 0-80 10B: 0-1 N: 0-8 O: 0-8 F: 0-3 S: 0-1

Alexander Nicholls

11-Feb-2016

3M2NO 191 (1.597) Cm (187:195)

1: TOF MS ES+  
1.14e+005

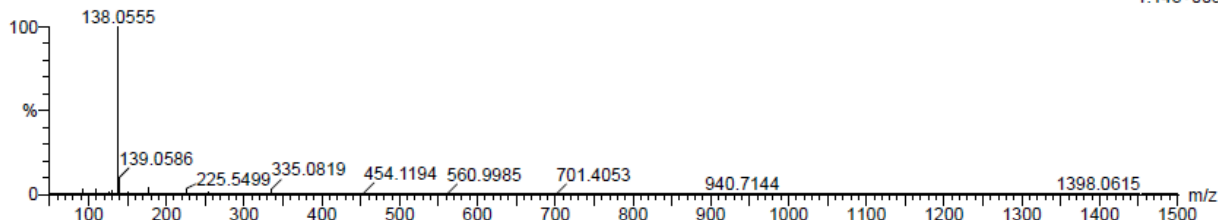

Minimum: -1.5  
Maximum: 5.0 5.0 50.0

| Mass     | Calc. Mass | mDa  | PPM  | DBE  | i-FIT | i-FIT (Norm) | Formula          |
|----------|------------|------|------|------|-------|--------------|------------------|
| 138.0555 | 138.0555   | 0.0  | 0.0  | 4.5  | 713.4 | 0.0          | C7 H8 N O2       |
|          | 138.0549   | 0.6  | 4.3  | -0.5 | 728.3 | 15.0         | C2 H9 10B N2 O F |
|          | 138.0562   | -0.7 | -5.1 | 0.5  | 728.6 | 15.3         | S H8 N7 S        |

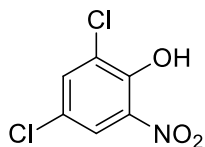

3k, 39% yield



Elemental Composition Report

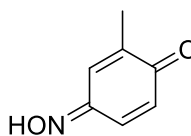

Single Mass Analysis

Tolerance = 5.0 PPM / DBE: min = -1.5, max = 50.0

Element prediction: Off

Number of isotope peaks used for i-FIT = 3

3l, 48 % yield

Monoisotopic Mass, Even Electron Ions

615 formula(e) evaluated with 3 results within limits (up to 500 best isotopic matches for each mass)

Elements Used:

C: 0-40 H: 0-80 10B: 0-1 N: 0-8 O: 0-8 F: 0-3 S: 0-1

Alexander Nicholls

11-Feb-2016

2M6NOP 216 (1.803) Cm (211:220)

1: TOF MS ES+

8.04e+004

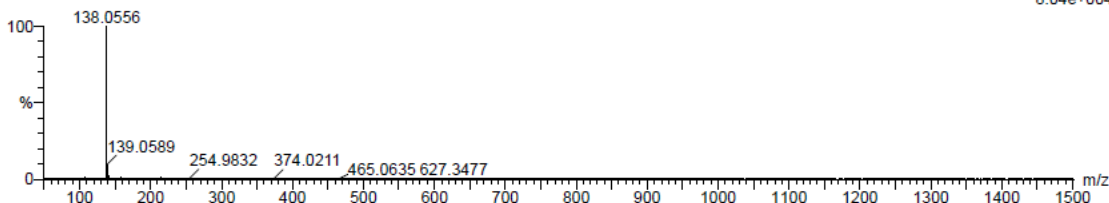

Minimum: -1.5  
Maximum: 5.0 5.0 50.0

| Mass     | Calc. Mass | mDa  | PPM  | DBE  | i-FIT | i-FIT (Norm) | Formula        |
|----------|------------|------|------|------|-------|--------------|----------------|
| 138.0556 | 138.0555   | 0.1  | 0.7  | 4.5  | 682.1 | 0.0          | C7 H8 N O2     |
|          | 138.0563   | -0.7 | -5.1 | -0.5 | 688.8 | 6.6          | C H8 10B N2 O5 |
|          | 138.0562   | -0.6 | -4.3 | 0.5  | 694.1 | 11.9         | H8 N7 S        |

Elemental Composition Report

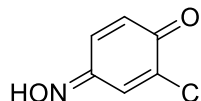

Single Mass Analysis

Tolerance = 3.0 mDa / DBE: min = -1.5, max = 100.0

Element prediction: Off

Number of isotope peaks used for i-FIT = 5

3m, 34% yield

Monoisotopic Mass, Even Electron Ions

426 formula(e) evaluated with 8 results within limits (up to 500 closest results for each mass)

Elements Used:

C: 0-60 H: 0-50 N: 0-6 O: 0-8 P: 0-3 Cl: 0-3

QToF Premier

24-Sep-2019

AJN\_2CL\_L\_135596 294 (2.477) Cm (292:295)

1: TOF MS ES+

4.39e+004

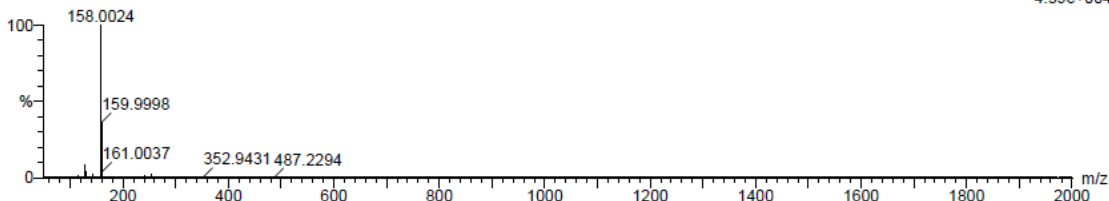

Minimum: -1.5  
Maximum: 3.0 5.0 100.0

| Mass     | Calc. Mass | mDa  | PPM   | DBE  | i-FIT | i-FIT (Norm) | Formula       |
|----------|------------|------|-------|------|-------|--------------|---------------|
| 158.0024 | 158.0031   | -0.7 | -4.4  | 13.5 | 643.9 | 15.7         | C12 N         |
|          | 158.0037   | -1.3 | -8.2  | 4.5  | 642.2 | 14.0         | C4 H6 N3 P2   |
|          | 158.0009   | 1.5  | 9.5   | 4.5  | 628.2 | 0.0          | C6 H5 N O2 Cl |
|          | 158.0007   | 1.7  | 10.8  | 4.5  | 642.7 | 14.5         | C5 H5 N O3 P  |
|          | 158.0000   | 2.4  | 15.2  | 0.5  | 639.5 | 11.3         | C H6 N5 Cl2   |
|          | 157.9999   | 2.5  | 15.8  | 0.5  | 636.5 | 8.3          | H6 N5 O P Cl  |
|          | 158.0049   | -2.5 | -15.8 | 0.5  | 643.7 | 15.5         | H4 N3 O7      |
|          | 158.0054   | -3.0 | -19.0 | -0.5 | 642.9 | 14.7         | C2 H11 N O P3 |

## Elemental Composition Report

### Single Mass Analysis

Tolerance = 10.0 mDa / DBE: min = -1.5, max = 50.0

Element prediction: Off

Number of isotope peaks used for i-FIT = 3

Monoisotopic Mass, Even Electron Ions

59 formula(e) evaluated with 3 results within limits (up to 500 best isotopic matches for each mass)

Elements Used:

C: 0-40 H: 0-40 N: 0-6 O: 0-4

Alex Nicholls

18-Mar-2016

2NOP 177 (1.500) Cm (177:197)

1: TOF MS ES+  
2.00e+003

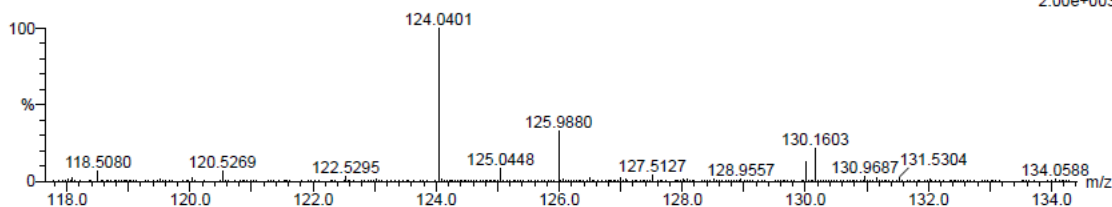

Minimum: -1.5  
Maximum: 10.0 5.0 50.0

| Mass     | Calc. Mass | mDa  | PPM   | DBE | i-FIT | i-FIT (Norm) | Formula    |
|----------|------------|------|-------|-----|-------|--------------|------------|
| 124.0401 | 124.0399   | 0.2  | 1.6   | 4.5 | 211.6 | 0.0          | C6 H6 N O2 |
|          | 124.0358   | 4.3  | 34.7  | 0.5 | 217.8 | 6.2          | C H6 N3 O4 |
|          | 124.0471   | -7.0 | -56.4 | 0.5 | 219.3 | 7.7          | H6 N5 O3   |

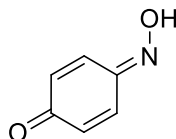

3o, 55% isolated mixture.

Page 1

## Elemental Composition Report

### Single Mass Analysis

Tolerance = 5.0 mDa / DBE: min = -1.5, max = 50.0

Element prediction: Off

Number of isotope peaks used for i-FIT = 3

Monoisotopic Mass, Even Electron Ions

429 formula(e) evaluated with 5 results within limits (up to 500 best isotopic matches for each mass)

Elements Used:

C: 0-40 H: 0-60 N: 0-8 O: 0-8 Br: 0-1

Alexander Nicholls

08-Feb-2016

MEDMAD 332 (2.807) Cm (332:337)

1: TOF MS ES+  
3.82e+002

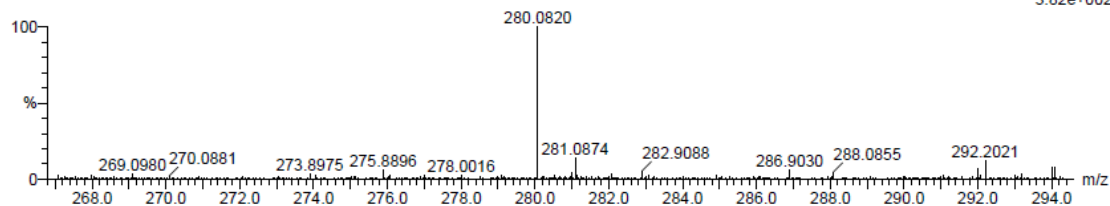

Minimum: -1.5  
Maximum: 5.0 20.0 50.0

| Mass     | Calc. Mass | mDa  | PPM  | DBE  | i-FIT | i-FIT (Norm) | Formula        |
|----------|------------|------|------|------|-------|--------------|----------------|
| 280.0820 | 280.0821   | -0.1 | -0.4 | 7.5  | 130.0 | 1.2          | C13 H14 N O6   |
|          | 280.0834   | -1.4 | -5.0 | 12.5 | 130.0 | 1.3          | C14 H10 N5 O2  |
|          | 280.0794   | 2.6  | 9.3  | 8.5  | 129.9 | 1.1          | C9 H10 N7 O4   |
|          | 280.0781   | 3.9  | 13.9 | 3.5  | 131.1 | 2.4          | C8 H14 N3 O8   |
|          | 280.0773   | 4.7  | 16.8 | 1.5  | 140.5 | 11.8         | C8 H19 N5 O Br |

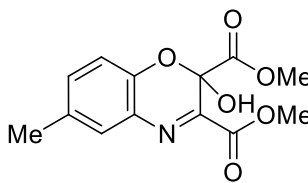

4a, 58% yield

Page 1

**Elemental Composition Report**

**Single Mass Analysis**

Tolerance = 5.0 mDa / DBE: min = -1.5, max = 50.0

Element prediction: Off

Number of isotope peaks used for i-FIT = 3

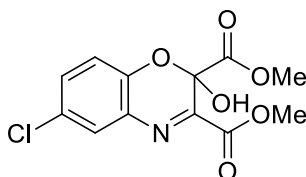

**4b, 24 % yield**

Monoisotopic Mass, Even Electron Ions

712 formula(e) evaluated with 12 results within limits (up to 500 best isotopic matches for each mass)

Elements Used:

C: 0-40 H: 0-60 N: 0-8 O: 0-8 Cl: 0-2

Alexander Nicholls

08-Feb-2016

4CLH 360 (2.997) Cm (360:361)

1: TOF MS ES+  
2.47e+002

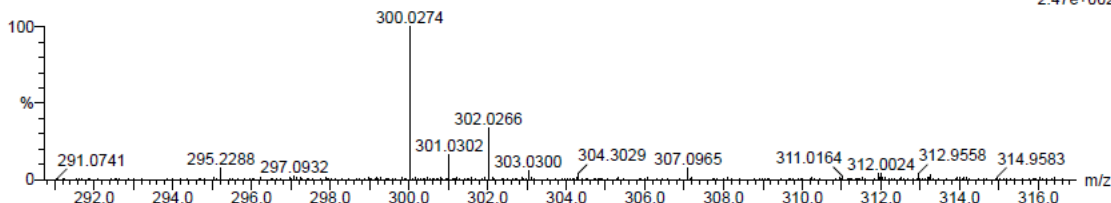

Minimum: -1.5  
Maximum: 5.0 20.0 50.0

| Mass     | Calc. Mass | mDa  | PPM   | DBE  | i-FIT | i-FIT (Norm) | Formula           |
|----------|------------|------|-------|------|-------|--------------|-------------------|
| 300.0274 | 300.0275   | -0.1 | -0.3  | 7.5  | 66.2  | 0.8          | C12 H11 N O6 Cl   |
|          | 300.0288   | -1.4 | -4.7  | 12.5 | 66.2  | 0.8          | C13 H7 N5 O2 Cl   |
|          | 300.0248   | 2.6  | 8.7   | 8.5  | 68.2  | 2.8          | C8 H7 N7 O4 Cl    |
|          | 300.0235   | 3.9  | 13.0  | 3.5  | 70.1  | 4.7          | C7 H11 N3 O8 Cl   |
|          | 300.0266   | 0.8  | 2.7   | 3.5  | 71.9  | 6.4          | C7 H12 N5 O4 Cl2  |
|          | 300.0307   | -3.3 | -11.0 | 7.5  | 72.4  | 6.9          | C12 H12 N3 O2 Cl2 |
|          | 300.0253   | 2.1  | 7.0   | -1.5 | 72.8  | 7.4          | C6 H16 N O8 Cl2   |
|          | 300.0226   | 4.8  | 16.0  | -0.5 | 75.3  | 9.8          | C2 H12 N7 O6 Cl2  |
|          | 300.0270   | 0.4  | 1.3   | 17.5 | 75.3  | 9.9          | C14 H2 N7 O2      |
|          | 300.0257   | 1.7  | 5.7   | 12.5 | 75.3  | 9.9          | C13 H6 N3 O6      |
|          | 300.0297   | -2.3 | -7.7  | 16.5 | 76.6  | 11.1         | C18 H6 N O4       |
|          | 300.0310   | -3.6 | -12.0 | 21.5 | 77.1  | 11.6         | C19 H2 N5         |

**Elemental Composition Report**

**Single Mass Analysis**

Tolerance = 5.0 mDa / DBE: min = -1.5, max = 50.0

Element prediction: Off

Number of isotope peaks used for i-FIT = 3

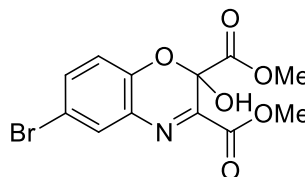

**4c, 10% yield**

Monoisotopic Mass, Even Electron Ions

562 formula(e) evaluated with 5 results within limits (up to 500 best isotopic matches for each mass)

Elements Used:

C: 0-40 H: 0-60 N: 0-8 O: 0-8 Br: 0-1

Alexander Nicholls

08-Feb-2016

4BRH 367 (3.056) Cm (367:371)

1: TOF MS ES+  
3.19e+002

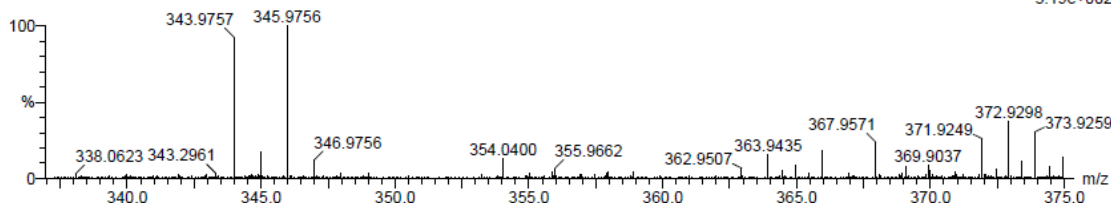

Minimum: -1.5  
Maximum: 5.0 20.0 50.0

| Mass     | Calc. Mass | mDa  | PPM  | DBE  | i-FIT | i-FIT (Norm) | Formula         |
|----------|------------|------|------|------|-------|--------------|-----------------|
| 343.9757 | 343.9770   | -1.3 | -3.8 | 7.5  | 122.4 | 0.8          | C12 H11 N O6 Br |
|          | 343.9743   | 1.4  | 4.1  | 8.5  | 124.5 | 2.9          | C8 H7 N7 O4 Br  |
|          | 343.9783   | -2.6 | -7.6 | 12.5 | 122.4 | 0.8          | C13 H7 N5 O2 Br |
|          | 343.9730   | 2.7  | 7.8  | 3.5  | 126.3 | 4.7          | C7 H11 N3 O8 Br |
|          | 343.9711   | 4.6  | 13.4 | 16.5 | 125.4 | 3.8          | C19 H7 N O Br   |

## Elemental Composition Report

### Single Mass Analysis

Tolerance = 3.0 mDa / DBE: min = -1.5, max = 100.0

Element prediction: Off

Number of isotope peaks used for i-FIT = 5

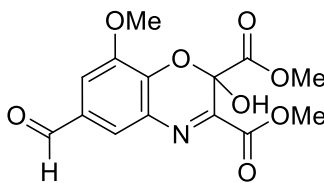

4d, 57% yield

Page 1

Monoisotopic Mass, Even Electron Ions

633 formula(e) evaluated with 4 results within limits (up to 500 closest results for each mass)

Elements Used:

C: 0-60 H: 0-50 N: 0-6 O: 0-8 S: 0-2

QToF Premier

23-Sep-2019

AJN\_VAN\_H\_135501 720 (2.908) Cm (720:754)

1: TOF MS ES-  
7.19e+003

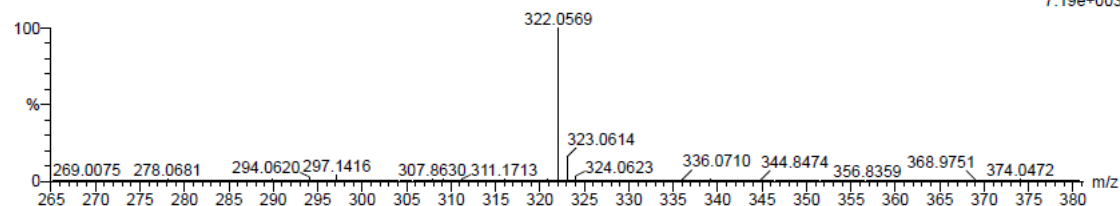

Minimum: -1.5  
Maximum: 3.0 5.0 100.0

| Mass     | Calc. Mass | mDa  | PFM  | DBE  | i-FIT | i-FIT (Norm) | Formula         |
|----------|------------|------|------|------|-------|--------------|-----------------|
| 322.0569 | 322.0572   | -0.3 | -0.9 | 8.5  | 398.3 | 19.0         | C15 H16 N O3 S2 |
|          | 322.0563   | 0.6  | 1.9  | 9.5  | 379.3 | 0.0          | C14 H12 N O8    |
|          | 322.0576   | -0.7 | -2.2 | 14.5 | 385.1 | 5.8          | C15 H8 N5 O4    |
|          | 322.0597   | -2.8 | -8.7 | 4.5  | 394.0 | 14.7         | C11 H16 N O8 S  |

## Elemental Composition Report

### Single Mass Analysis

Tolerance = 3.0 mDa / DBE: min = -1.5, max = 100.0

Element prediction: Off

Number of isotope peaks used for i-FIT = 5

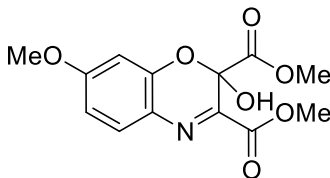

4h, 31% yield

Page 1

Monoisotopic Mass, Even Electron Ions

836 formula(e) evaluated with 6 results within limits (up to 500 closest results for each mass)

Elements Used:

C: 0-60 H: 0-50 N: 0-6 O: 0-8 S: 0-4

QToF Premier

26-Sep-2019

AJN\_3OME\_H\_135690 343 (2.892) Cm (343:345)

1: TOF MS ES+  
1.45e+005

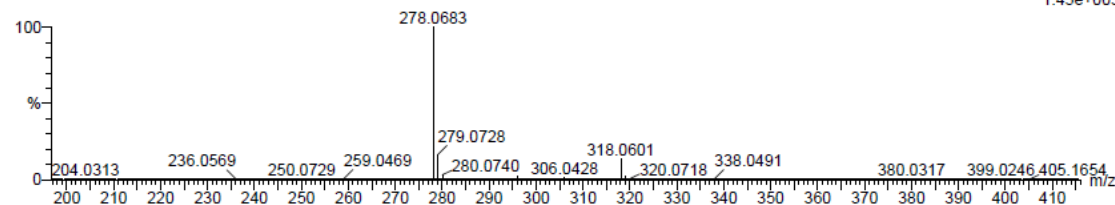

Minimum: -1.5  
Maximum: 3.0 5.0 100.0

| Mass     | Calc. Mass | mDa  | PFM  | DBE  | i-FIT | i-FIT (Norm) | Formula         |
|----------|------------|------|------|------|-------|--------------|-----------------|
| 296.0790 | 296.0784   | 0.6  | 2.0  | 12.5 | 198.4 | 1.5          | C14 H10 N5 O3   |
|          | 296.0779   | 1.1  | 3.7  | 6.5  | 200.4 | 3.6          | C14 H18 N O2 S2 |
|          | 296.0804   | -1.4 | -4.7 | 2.5  | 199.3 | 2.5          | C10 H18 N O7 S  |
|          | 296.0770   | 2.0  | 6.8  | 7.5  | 197.5 | 0.7          | C13 H14 N O7    |
|          | 296.0813   | -2.3 | -7.8 | 1.5  | 202.2 | 5.4          | C11 H22 N O2 S3 |
|          | 296.0817   | -2.7 | -9.1 | 7.5  | 198.7 | 1.9          | C11 H14 N5 O3 S |

## Elemental Composition Report

### Single Mass Analysis

Tolerance = 3.0 mDa / DBE: min = -1.5, max = 50.0

Element prediction: Off

Number of isotope peaks used for i-FIT = 3

Monoisotopic Mass, Even Electron Ions

3704 formula(e) evaluated with 30 results within limits (up to 500 best isotopic matches for each mass)

Elements Used:

C: 0-40 H: 0-80 N: 0-8 O: 0-8 F: 0-3 S: 0-1 127I: 0-1 23Na: 0-1

Alexander Nicholls

16-Feb-2016

3MEH 351 (2.921) Cm (342:357)

1: TOF MS ES+  
4.65e+004

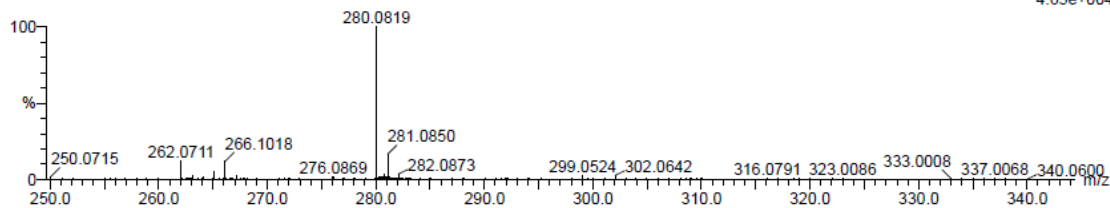

Minimum:

Maximum: 3.0 5.0 -1.5 50.0

| Mass     | Calc. Mass | mDa  | PPM  | DBE  | i-FIT | i-FIT (Norm) | Formula                |
|----------|------------|------|------|------|-------|--------------|------------------------|
| 280.0819 | 280.0821   | -0.2 | -0.7 | 7.5  | 573.4 | 0.1          | C13 H14 N O6           |
|          | 280.0834   | -1.5 | -5.4 | 12.5 | 576.5 | 3.2          | C14 H10 N5 O2          |
|          | 280.0810   | 0.9  | 3.2  | 9.5  | 577.1 | 3.8          | C12 H11 N5 O2 23Na     |
|          | 280.0810   | 0.9  | 3.2  | 9.5  | 577.9 | 4.6          | C12 H9 N5 F3           |
|          | 280.0833   | -1.4 | -5.0 | 3.5  | 578.0 | 4.7          | C10 H15 N O7 F         |
|          | 280.0797   | 2.2  | 7.9  | 4.5  | 578.2 | 4.9          | C11 H15 N O6 23Na      |
|          | 280.0797   | 2.2  | 7.9  | 4.5  | 578.8 | 5.5          | C11 H13 N O4 F3        |
|          | 280.0846   | -2.7 | -9.6 | 8.5  | 579.1 | 5.8          | C11 H11 N5 O3 F        |
|          | 280.0822   | -0.3 | -1.1 | 5.5  | 579.3 | 6.0          | C9 H12 N5 O3 F<br>23Na |

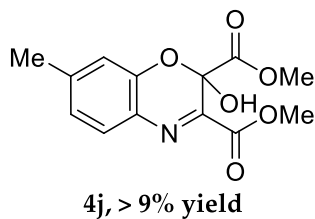

# IR Spectra of selected Compounds

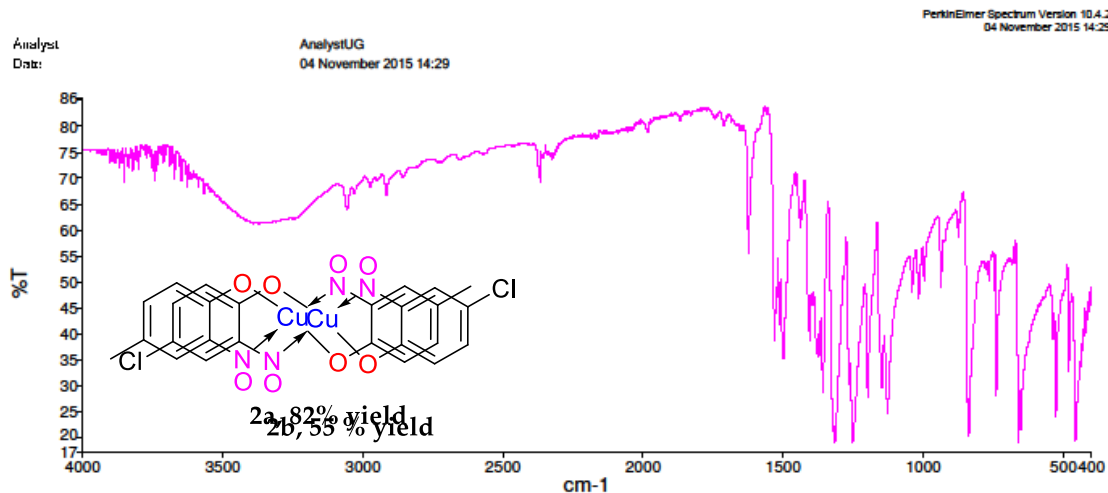

| Sample Name | Description | Quality Checks                                                |
|-------------|-------------|---------------------------------------------------------------|
| AJN_004     | ME          | The Quality Checks do not report any warnings for the sample. |

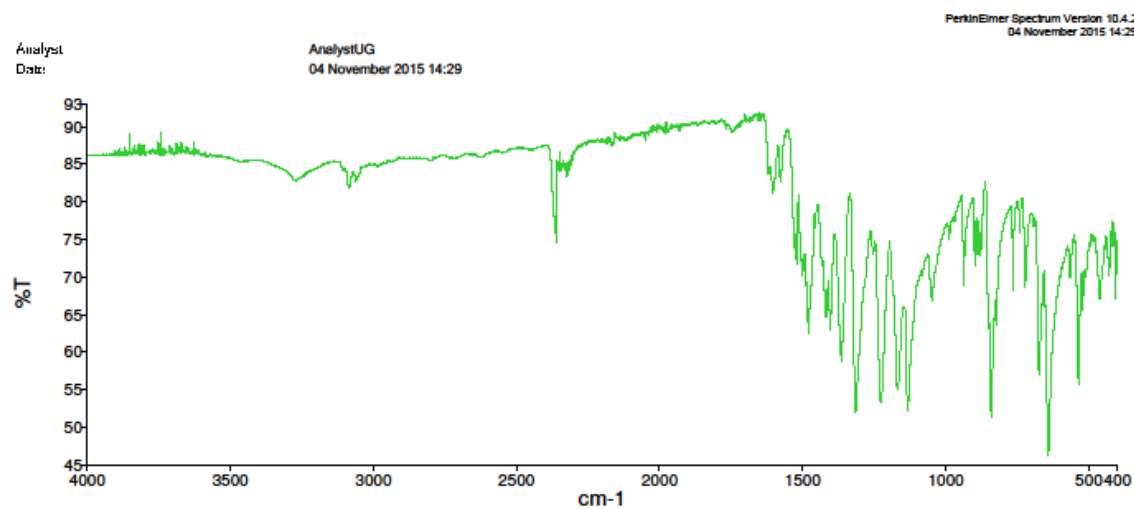

| Sample Name | Description | Quality Checks                                                |
|-------------|-------------|---------------------------------------------------------------|
| AJN_005     | CL          | The Quality Checks do not report any warnings for the sample. |

Analyst  
Date:

AnalystUG  
04 November 2015 14:30

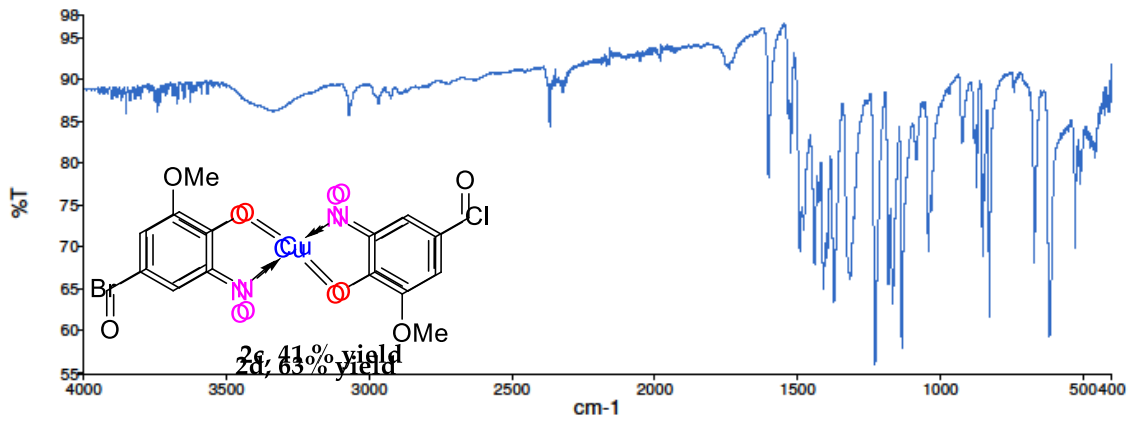

| Sample Name | Description | Quality Checks                                                |
|-------------|-------------|---------------------------------------------------------------|
| AJN_003     | BR          | The Quality Checks do not report any warnings for the sample. |

Analyst  
Date:

AnalystUG  
02 October 2019 14:17

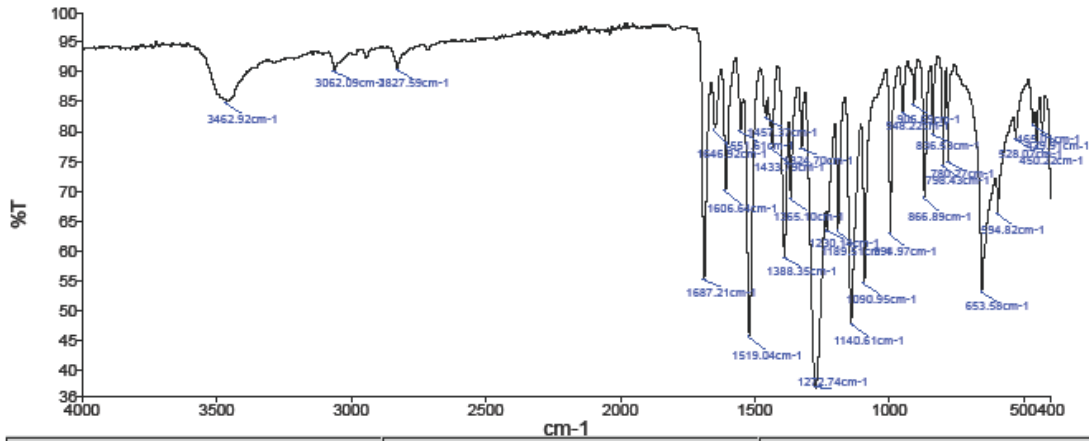

| Sample Name   | Description                                             | Quality Checks                                                |
|---------------|---------------------------------------------------------|---------------------------------------------------------------|
| AnalystUG 918 | Sample 918 By AnalystUG Date Wednesday, October 02 2019 | The Quality Checks do not report any warnings for the sample. |

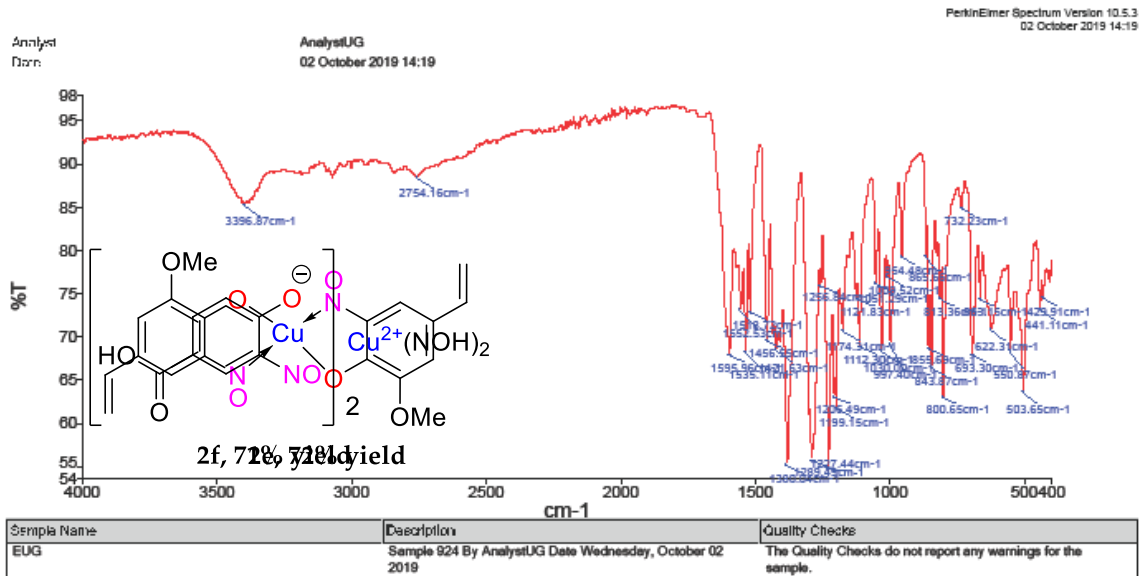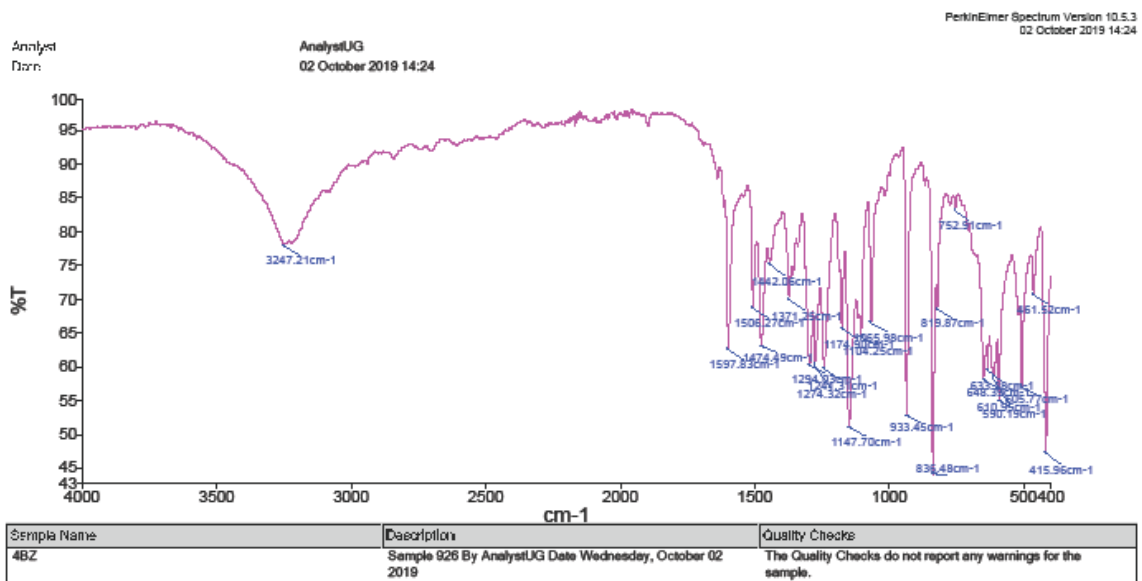



Analyst  
Date:

AnalystUG  
02 October 2019 14:26

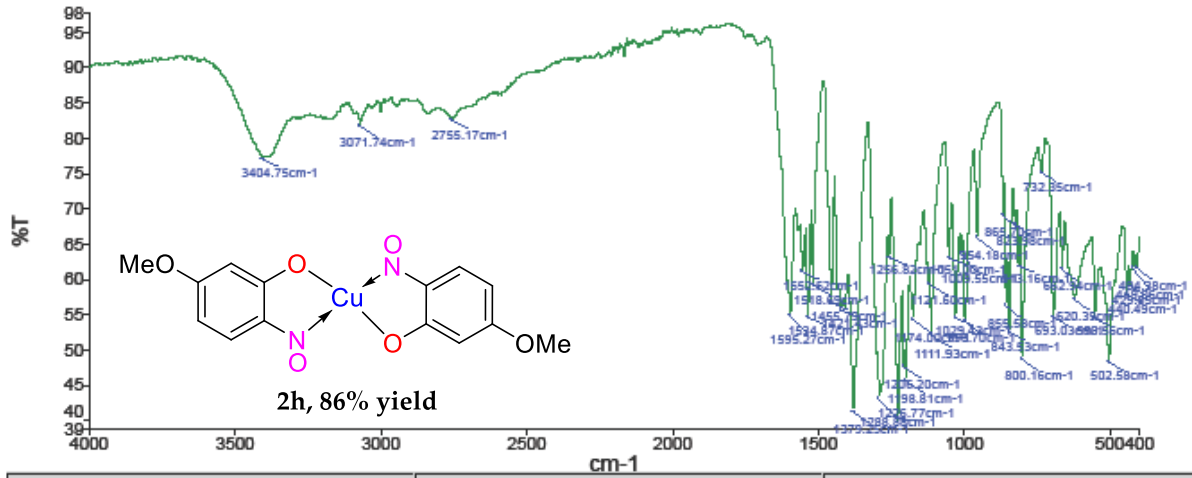

| Sample Name   | Description                                             | Quality Checks                                                |
|---------------|---------------------------------------------------------|---------------------------------------------------------------|
| AnalystUG 928 | Sample 928 By AnalystUG Date Wednesday, October 02 2019 | The Quality Checks do not report any warnings for the sample. |

Analyst  
Date:

AnalystUG  
04 November 2015 14:31

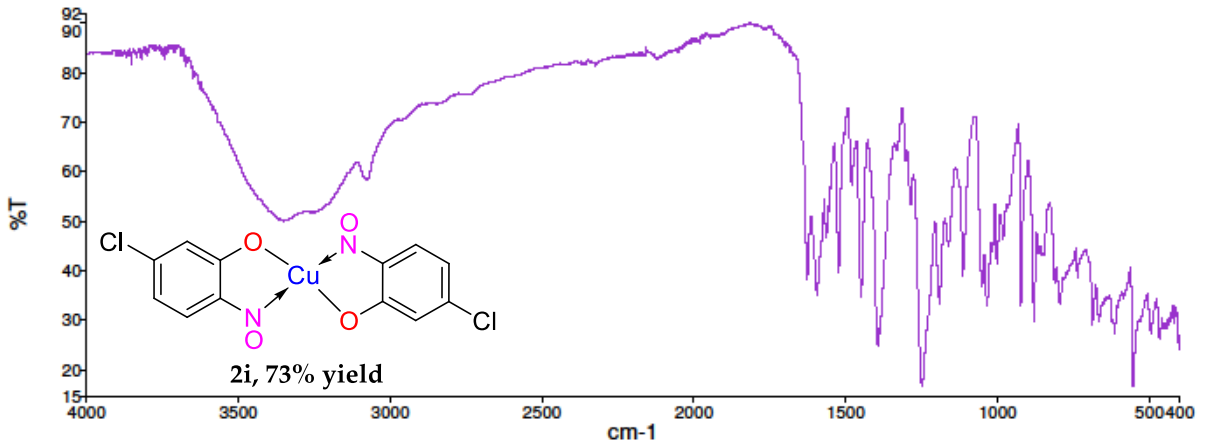

| Sample Name | Description | Quality Checks                                                |
|-------------|-------------|---------------------------------------------------------------|
| Alex N_001  | 3Ca         | The Quality Checks do not report any warnings for the sample. |

Analyst  
Date:

AnalystUG  
10 February 2016 16:45

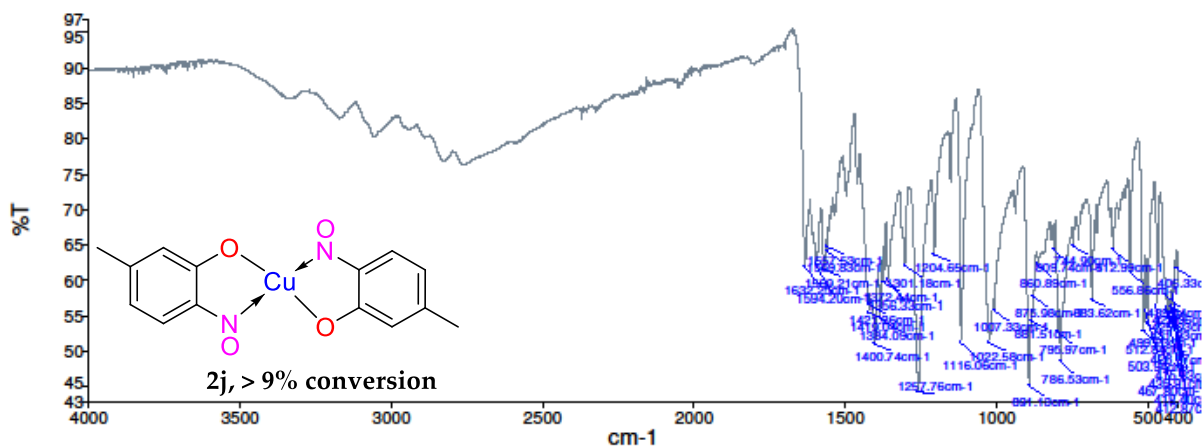

| Sample Name | Description | Quality Checks                                                |
|-------------|-------------|---------------------------------------------------------------|
| 3M          | AJN         | The Quality Checks do not report any warnings for the sample. |

Analyst  
Date:

AnalystUG  
02 October 2019 14:22

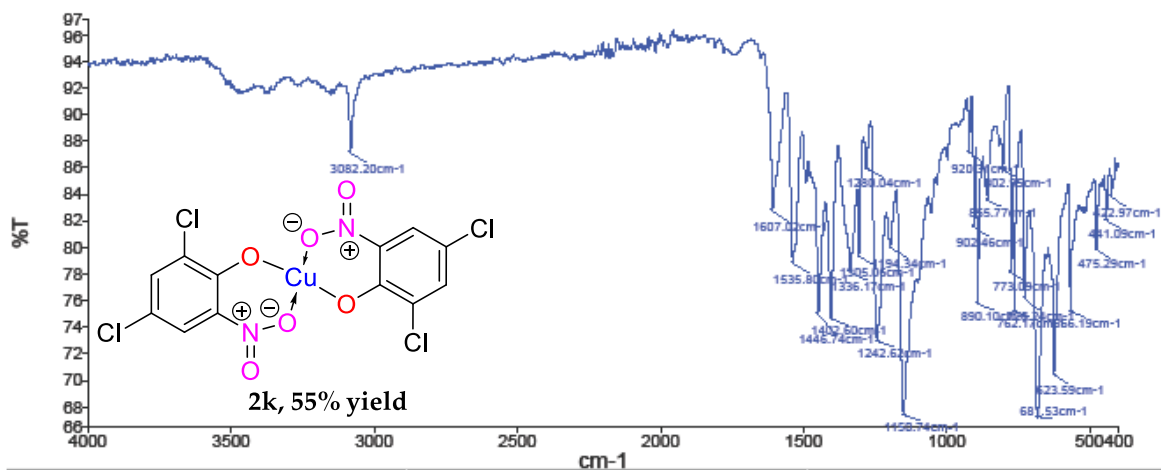

| Sample Name | Description                                             | Quality Checks                                                       |
|-------------|---------------------------------------------------------|----------------------------------------------------------------------|
| 24CL        | Sample 925 By AnalystUG Date Wednesday, October 02 2019 | The Quality Checks give rise to a Weak Bands warning for the sample. |

Analyst  
Date:

AnalystUG  
10 February 2016 16:48

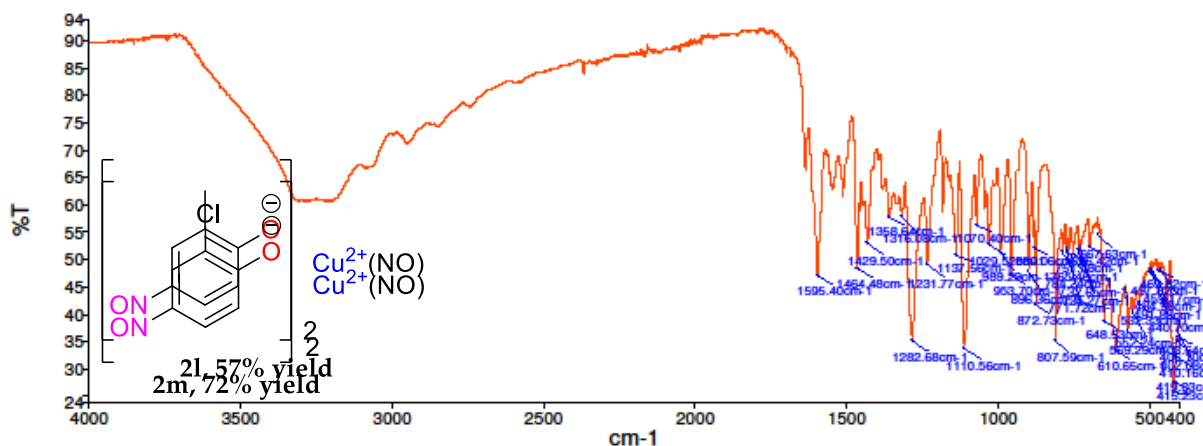

| Sample Name | Description                                              | Quality Checks                                                |
|-------------|----------------------------------------------------------|---------------------------------------------------------------|
| 2M          | Sample 904 By AnalystUG Date Wednesday, February 10 2016 | The Quality Checks do not report any warnings for the sample. |

Analyst  
Date:

AnalystUG  
04 November 2015 14:39

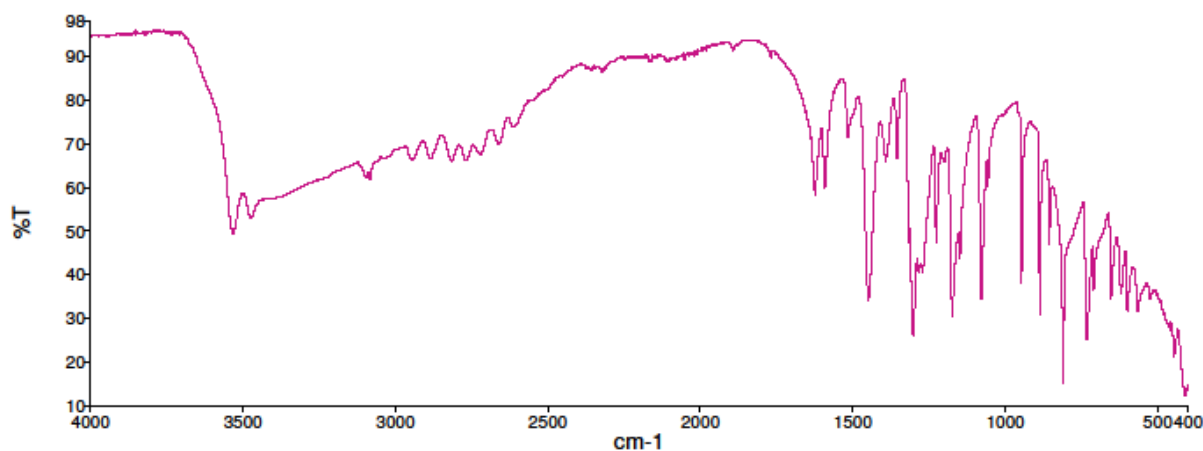

| Sample Name | Description                                              | Quality Checks                                                |
|-------------|----------------------------------------------------------|---------------------------------------------------------------|
| AJN_007     | Sample 674 By AnalystUG Date Wednesday, November 04 2015 | The Quality Checks do not report any warnings for the sample. |

Analyst: AnalystUG  
Date: 02 October 2019 14:29

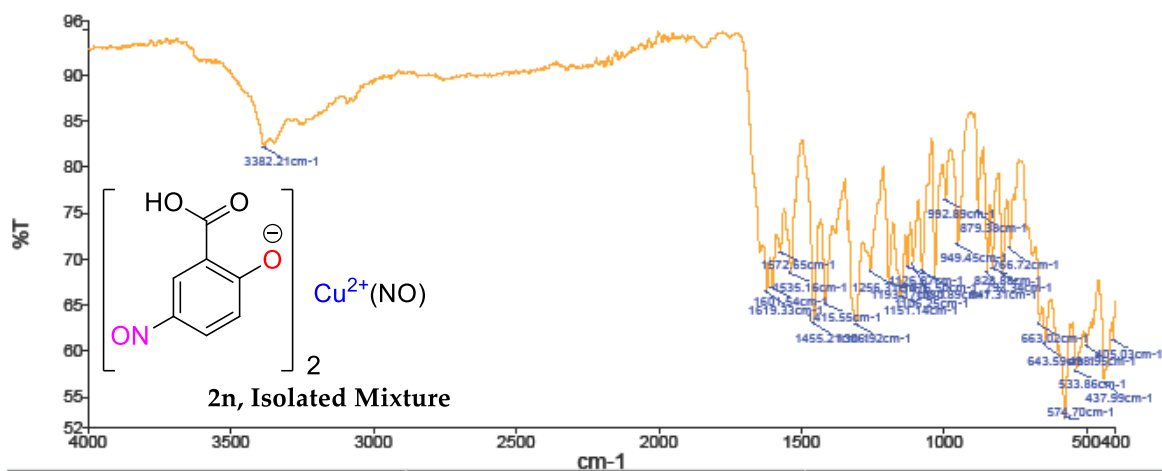

| Sample Name | Description                                             | Quality Checks                                                       |
|-------------|---------------------------------------------------------|----------------------------------------------------------------------|
| SAL         | Sample 629 By AnalystUG Date Wednesday, October 02 2019 | The Quality Checks give rise to a Weak Bands warning for the sample. |

Analyst: AnalystUG  
Date: 04 November 2015 14:30

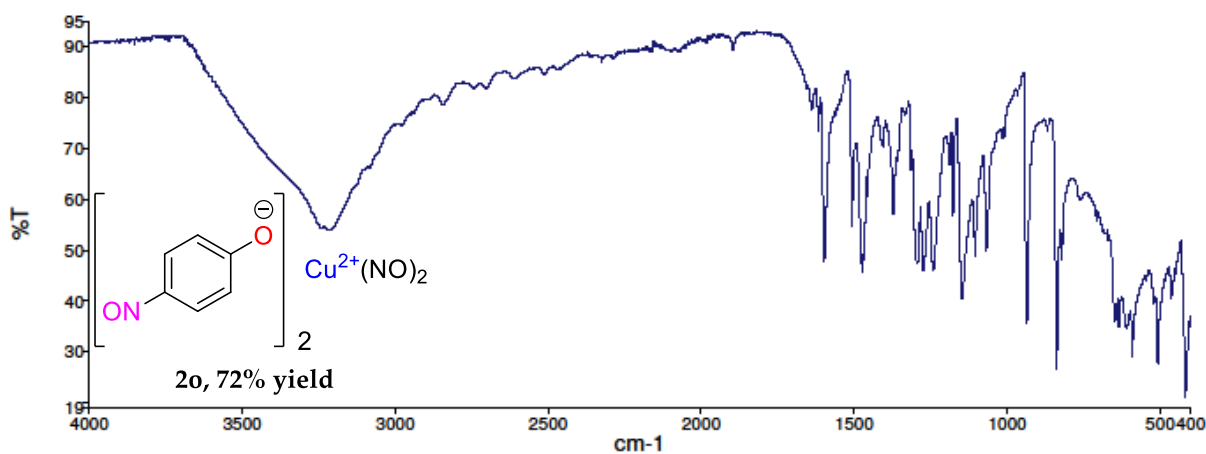

| Sample Name | Description | Quality Checks                                                |
|-------------|-------------|---------------------------------------------------------------|
| AJN_001     | OH          | The Quality Checks do not report any warnings for the sample. |

Analyst  
Date:

AnalystUG  
03 February 2016 15:59

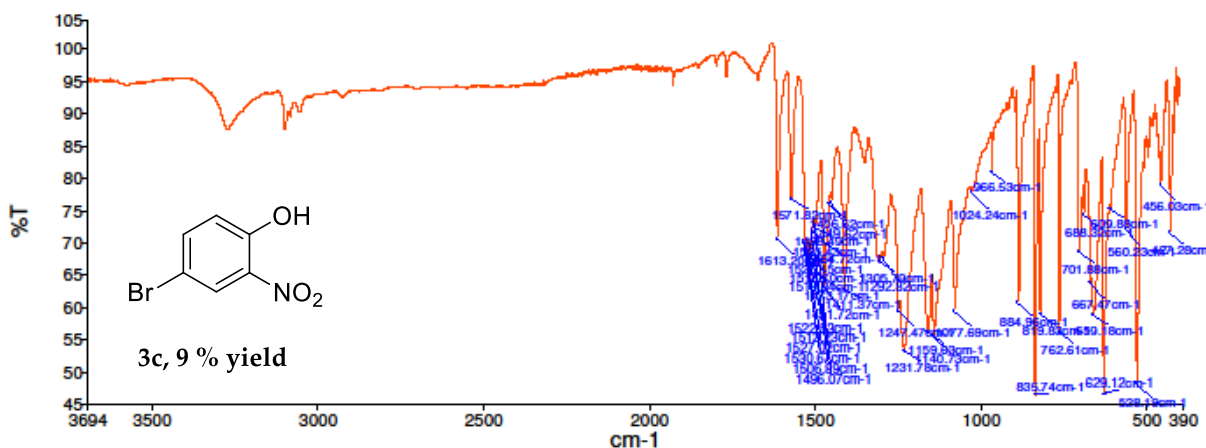

| Sample Name     | Description | Quality Checks                                                |
|-----------------|-------------|---------------------------------------------------------------|
| 4-br-2-no2-phil |             | The Quality Checks do not report any warnings for the sample. |

Analyst  
Date:

AnalystUG  
10 February 2016 16:38

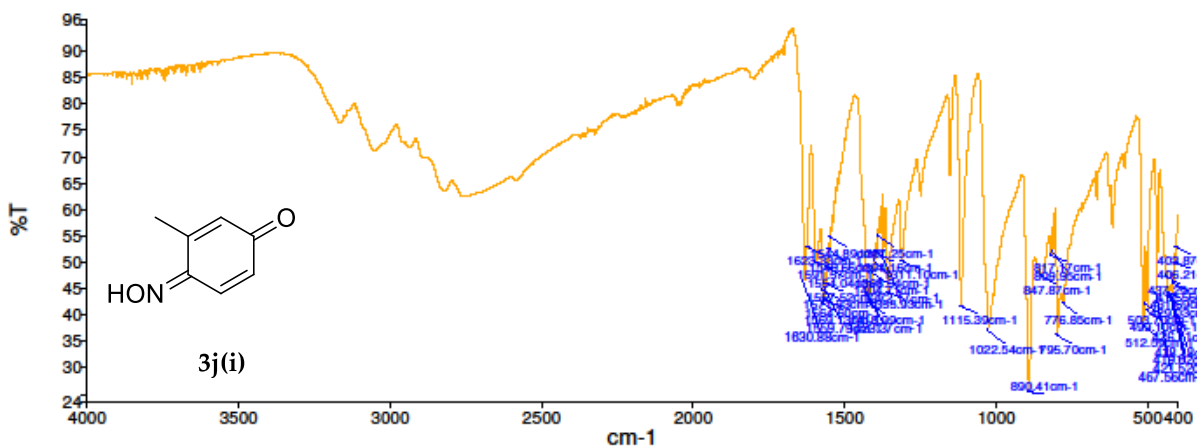

| Sample Name | Description | Quality Checks                                                |
|-------------|-------------|---------------------------------------------------------------|
| 3M L        | AJN         | The Quality Checks do not report any warnings for the sample. |

Analyst  
Date:

AnalystUG  
10 February 2016 16:41

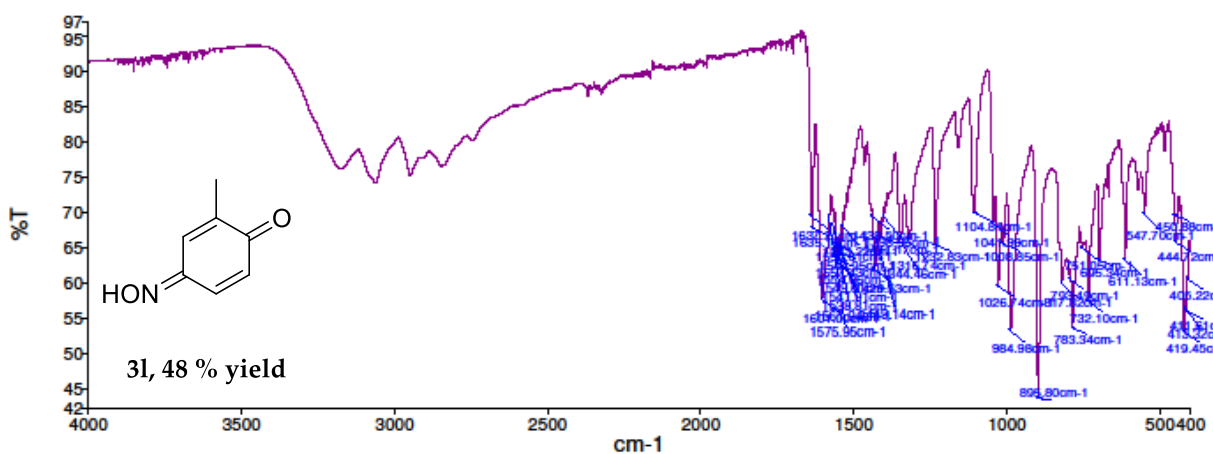

| Sample Name | Description                                              | Quality Checks                                                |
|-------------|----------------------------------------------------------|---------------------------------------------------------------|
| 2ML         | Sample 902 By AnalystUG Date Wednesday, February 10 2016 | The Quality Checks do not report any warnings for the sample. |

Analyst  
Date:

AnalystUG  
03 February 2016 16:09

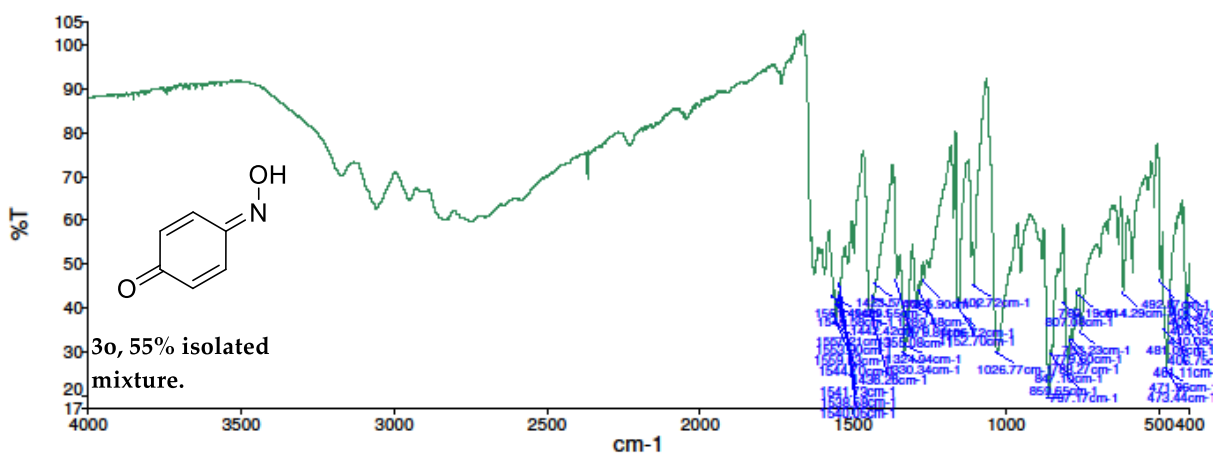

| Sample Name     | Description                                              | Quality Checks                                                           |
|-----------------|----------------------------------------------------------|--------------------------------------------------------------------------|
| 2-NITROSOPHENOL | Sample 896 By AnalystUG Date Wednesday, February 03 2016 | The Quality Checks give rise to a Negative Bands warning for the sample. |

Analyst  
Date:

AnalystUG  
03 February 2016 16:03

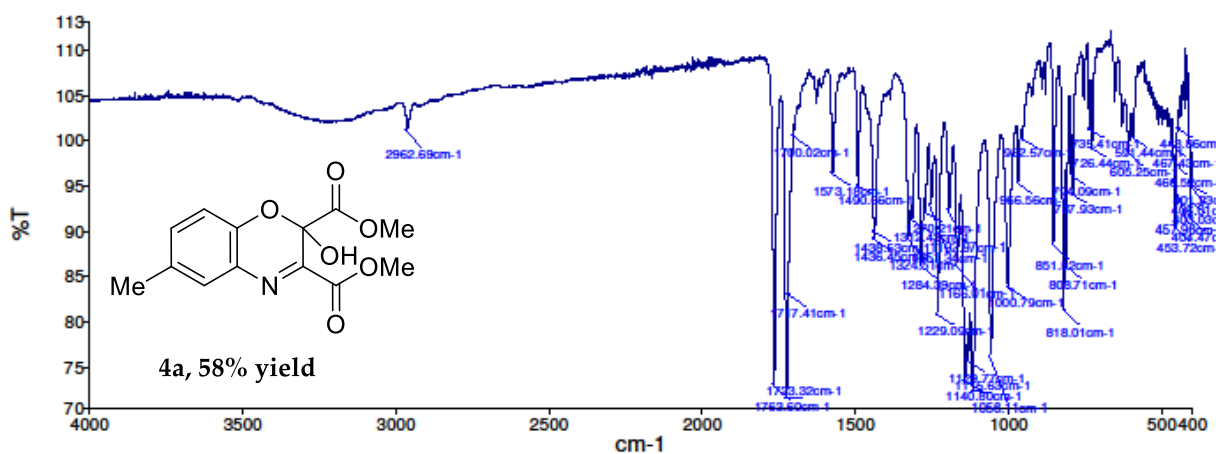

| Sample Name | Description                                              | Quality Checks                                                          |
|-------------|----------------------------------------------------------|-------------------------------------------------------------------------|
| 4ME Cycle   | Sample 906 By AnalystUG Date Wednesday, February 03 2016 | The Quality Checks give rise to a Baseline High warning for the sample. |

Analyst  
Date:

AnalystUG  
03 February 2016 16:06

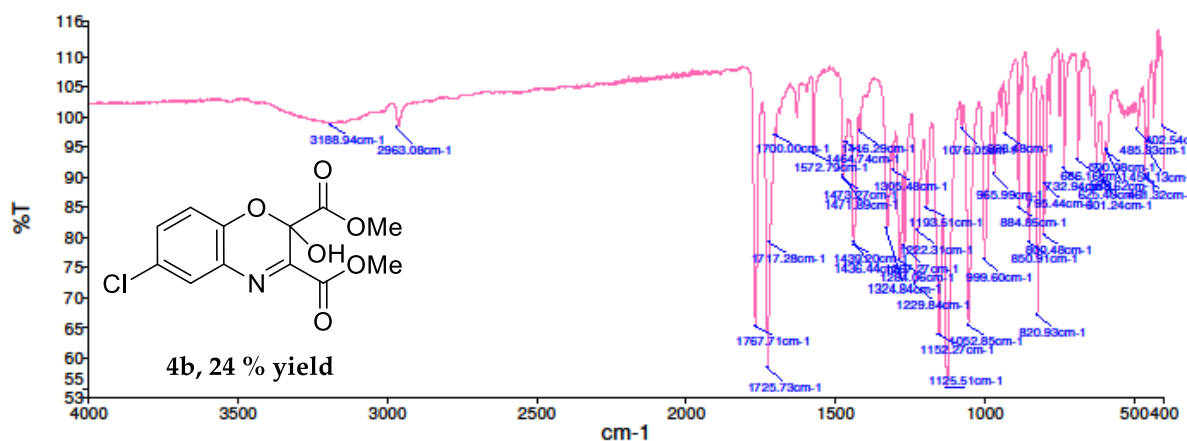

| Sample Name | Description                                              | Quality Checks                                                          |
|-------------|----------------------------------------------------------|-------------------------------------------------------------------------|
| 4CL CYCLE   | Sample 895 By AnalystUG Date Wednesday, February 03 2016 | The Quality Checks give rise to a Baseline High warning for the sample. |

Analyst  
Darr

AnalystUG  
02 October 2019 14:32

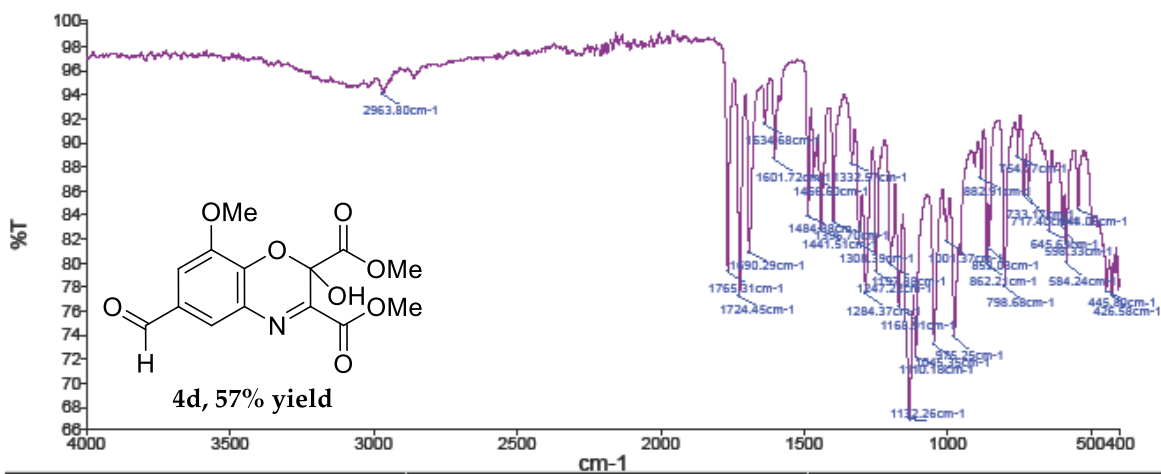

| Sample Name | Description                                             | Quality Checks                                                       |
|-------------|---------------------------------------------------------|----------------------------------------------------------------------|
| VAN H       | Sample 931 By AnalystUG Date Wednesday, October 02 2019 | The Quality Checks give rise to a Weak Bands warning for the sample. |

Analyst  
Darr

AnalystUG  
02 October 2019 14:38

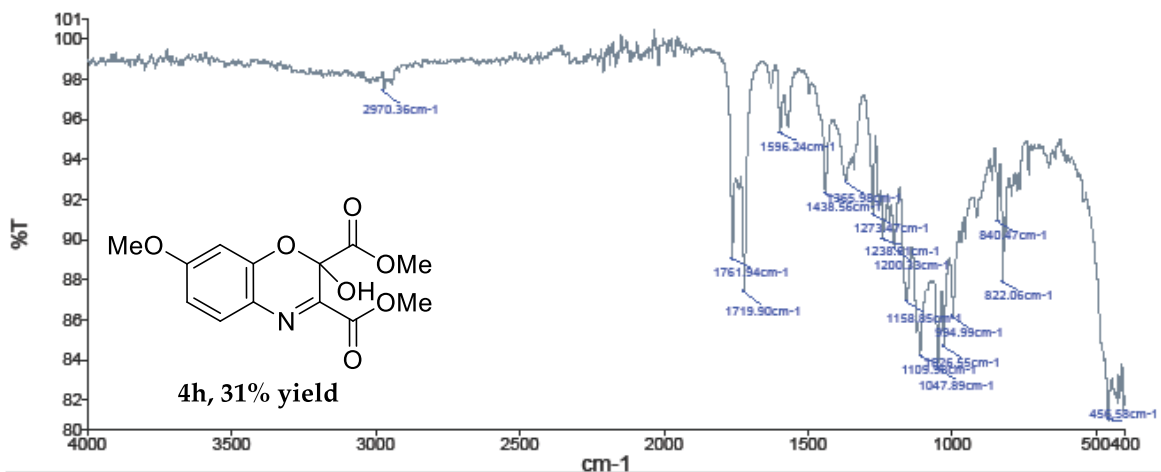

| Sample Name | Description                                             | Quality Checks                                                    |
|-------------|---------------------------------------------------------|-------------------------------------------------------------------|
| 3OME H      | Sample 932 By AnalystUG Date Wednesday, October 02 2019 | The Quality Checks give rise to multiple warnings for the sample. |
